# Supplementary material for: ANO1 Expression Orchestrates p27Kip1/MCL1-Mediated Signaling in Head and Neck Squamous Cell Carcinoma
Source: MDPI journal article supplement (doi:10.3390/cancers13051170), 2021-03-09
Supplement: s1 [file s1]

**Figure S1**

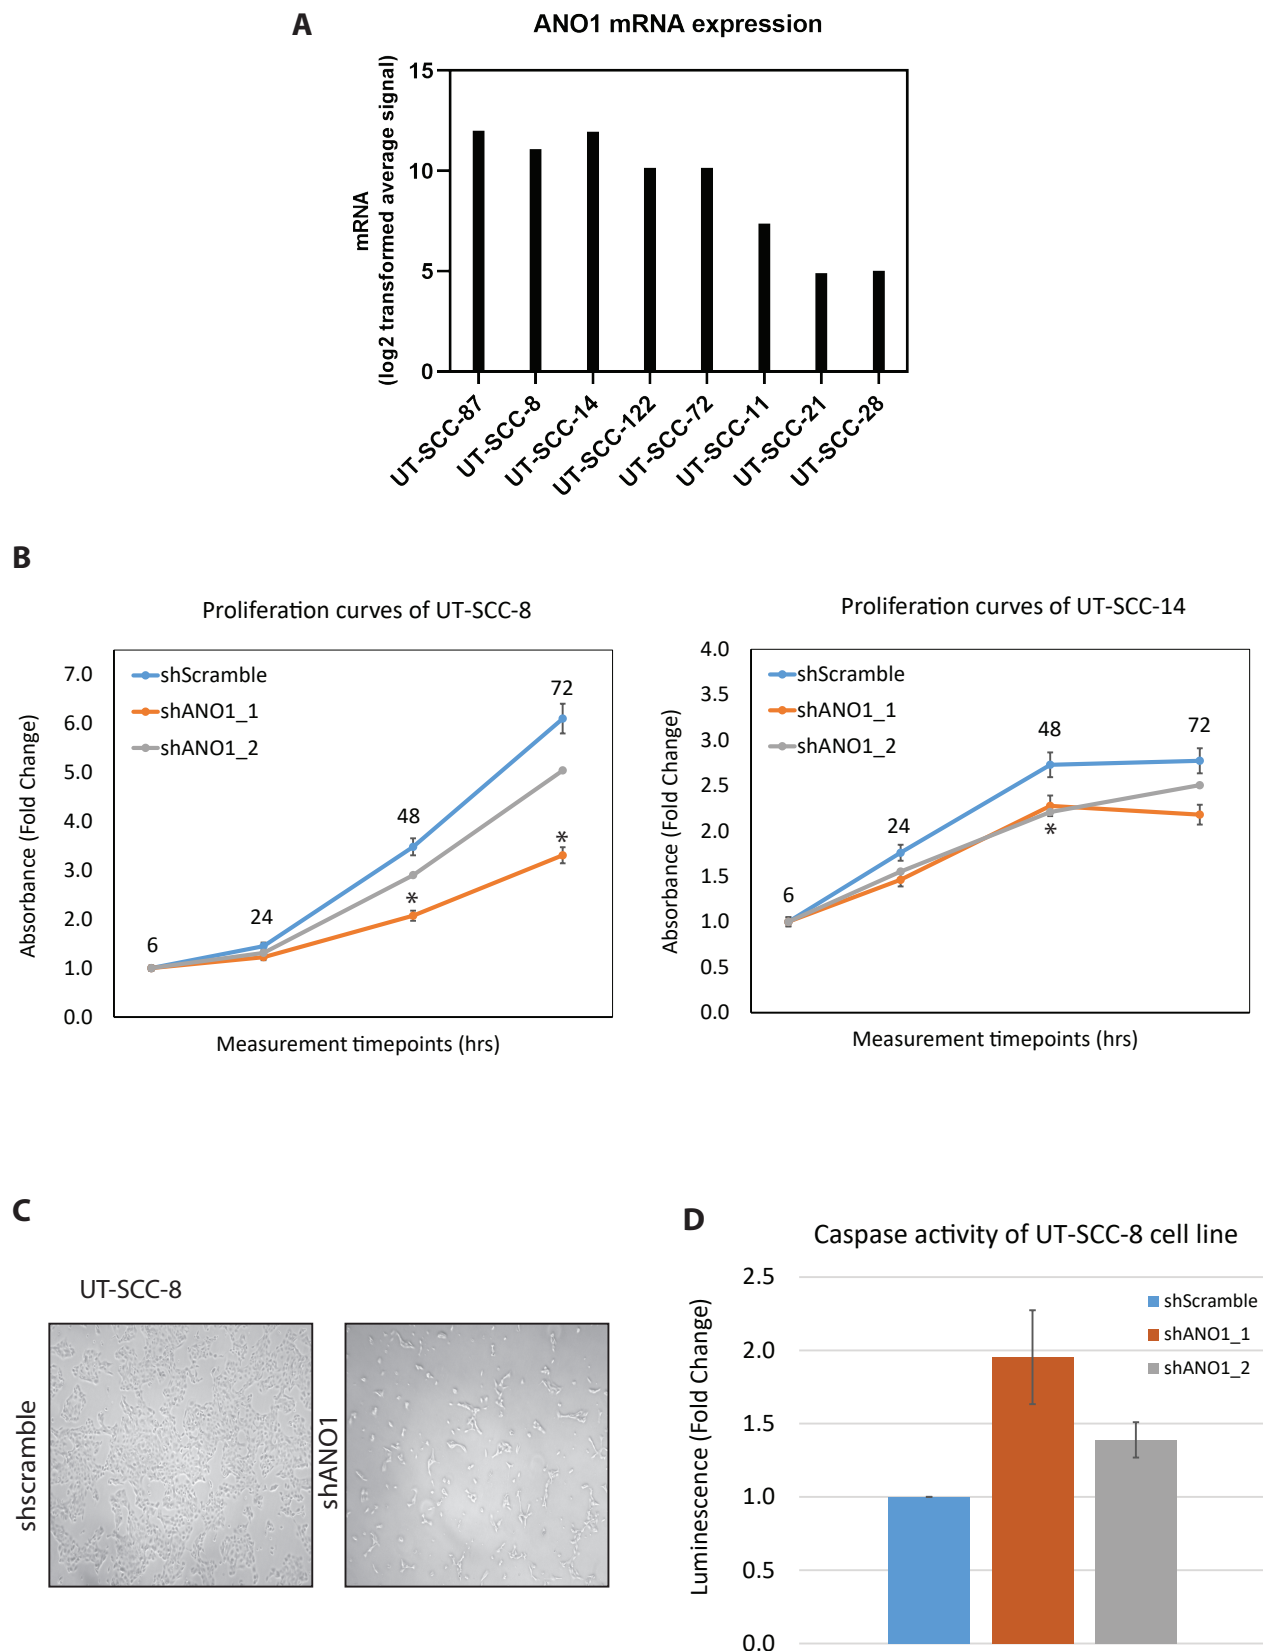

**Figure S2**

**A**

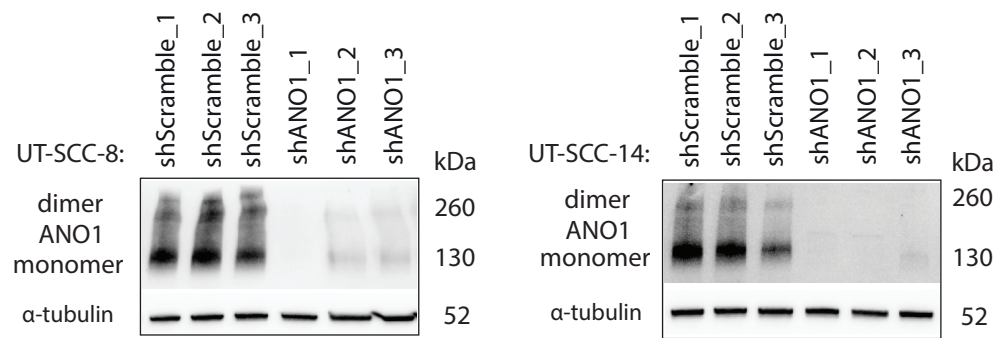

**B**

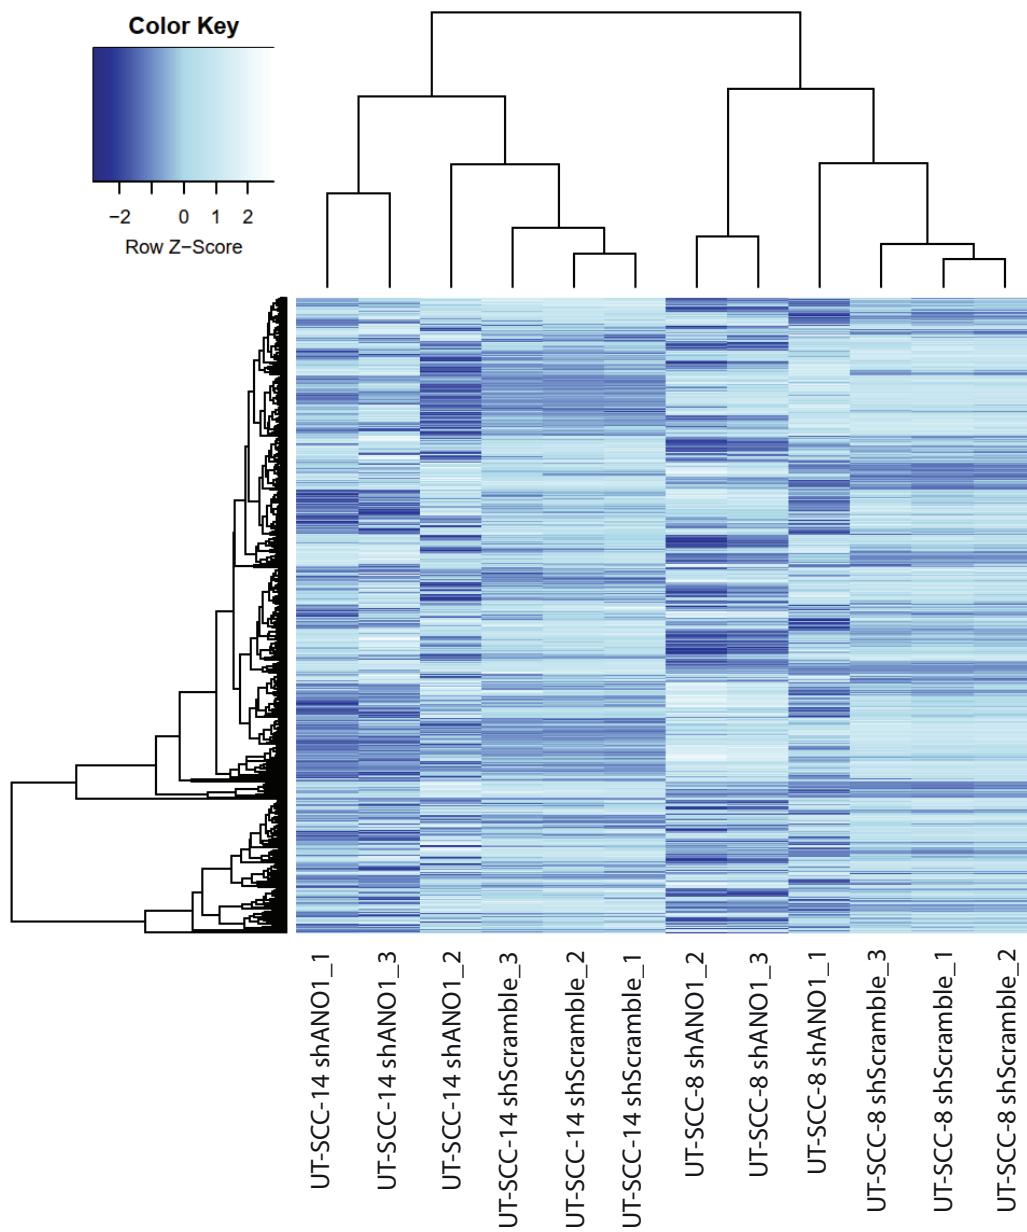



**Figure S3**

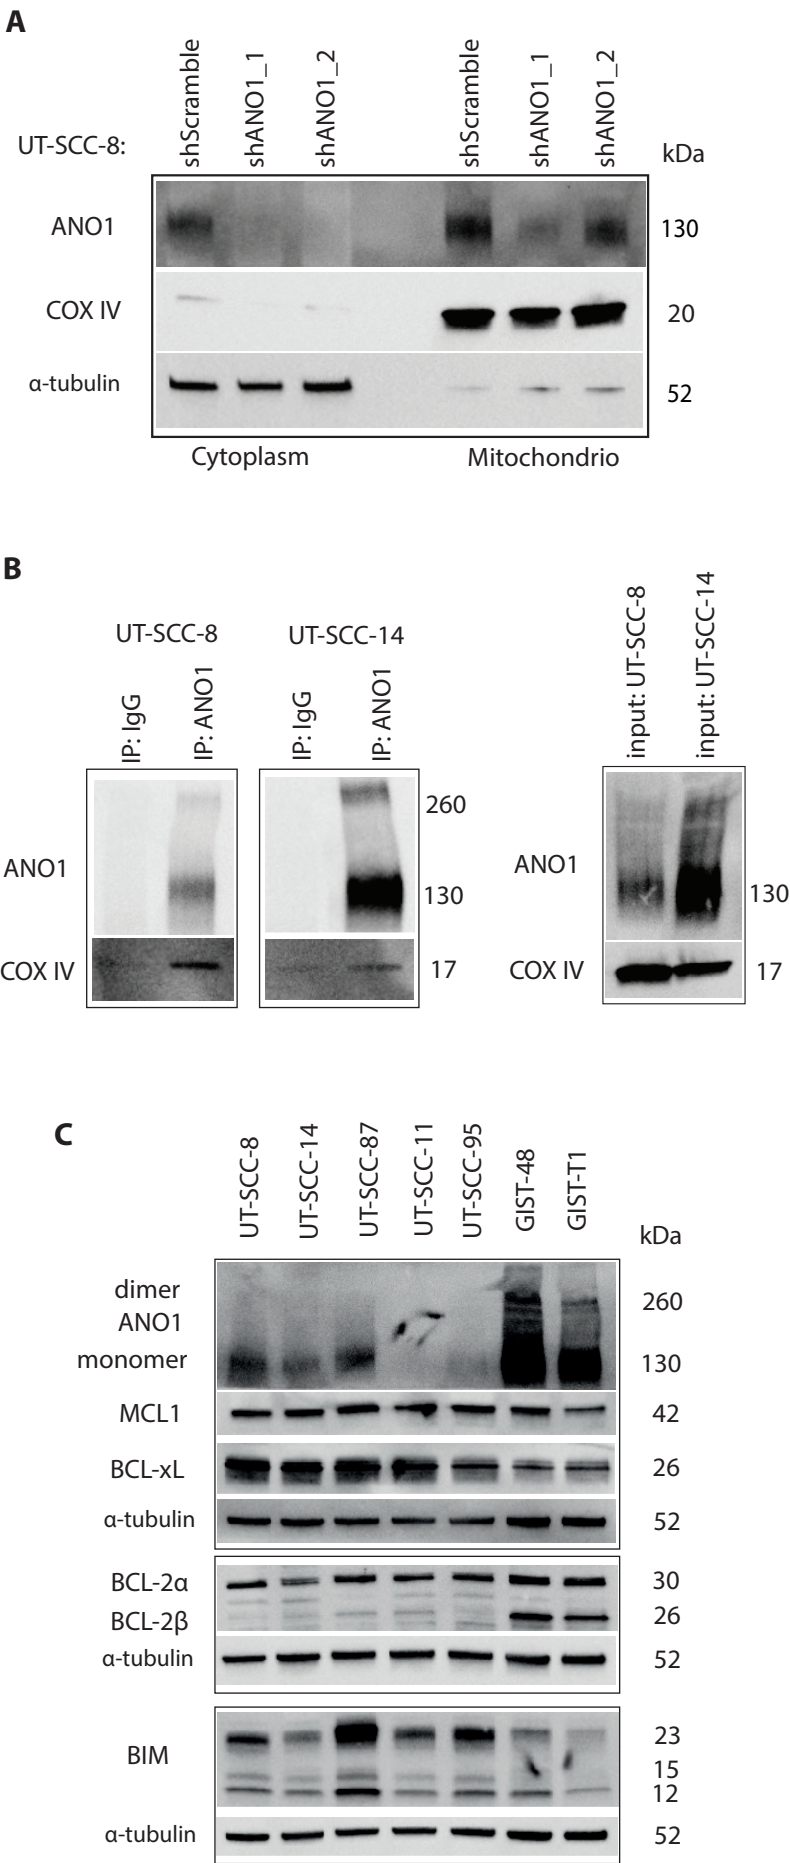

**Figure S4**

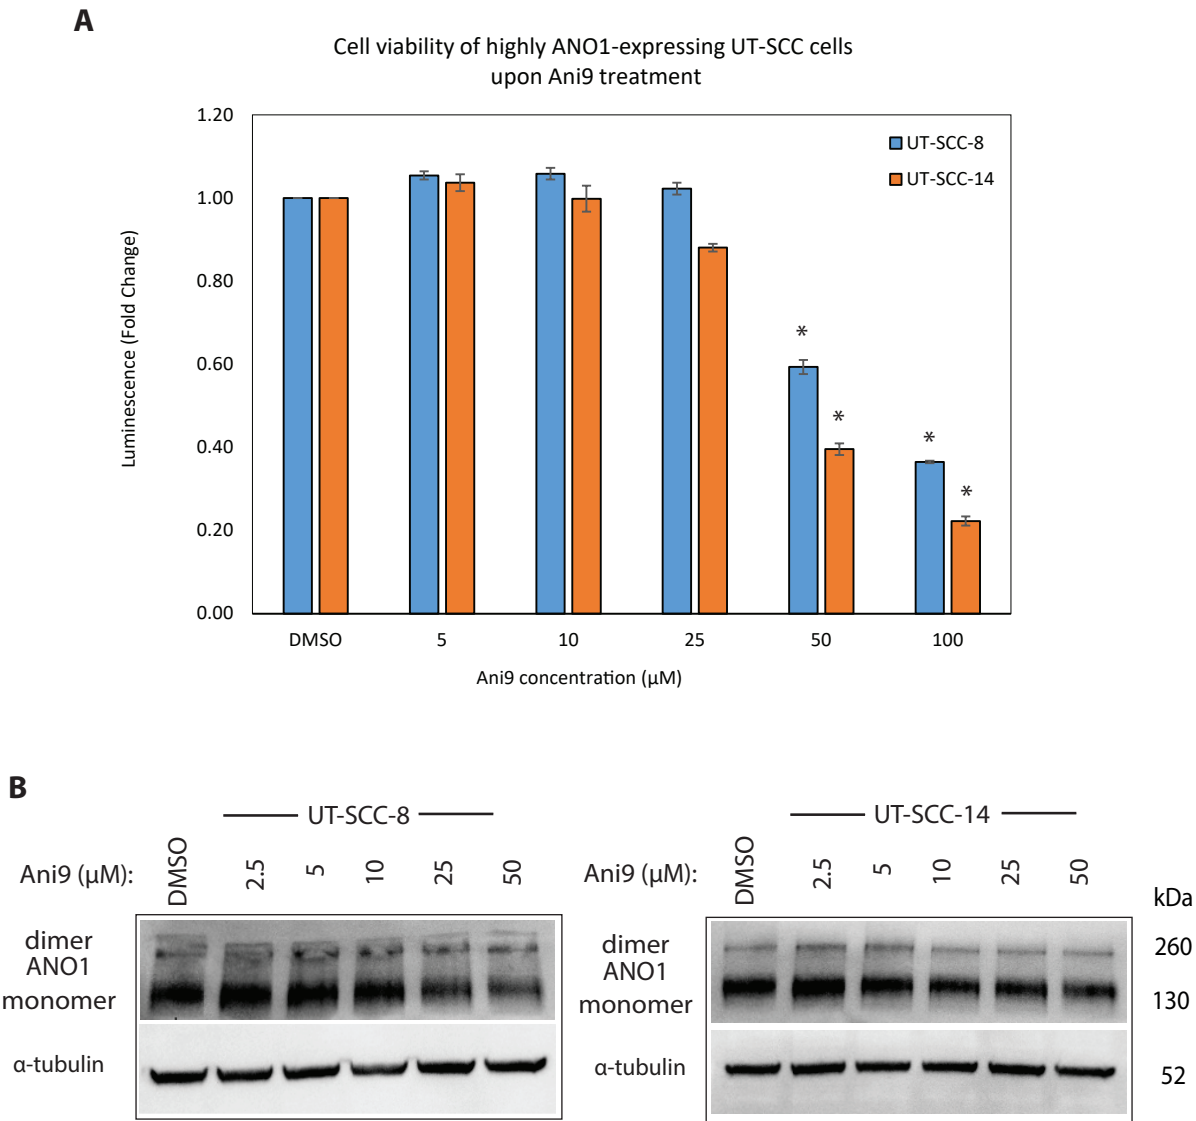

**Figure S5**

**A**

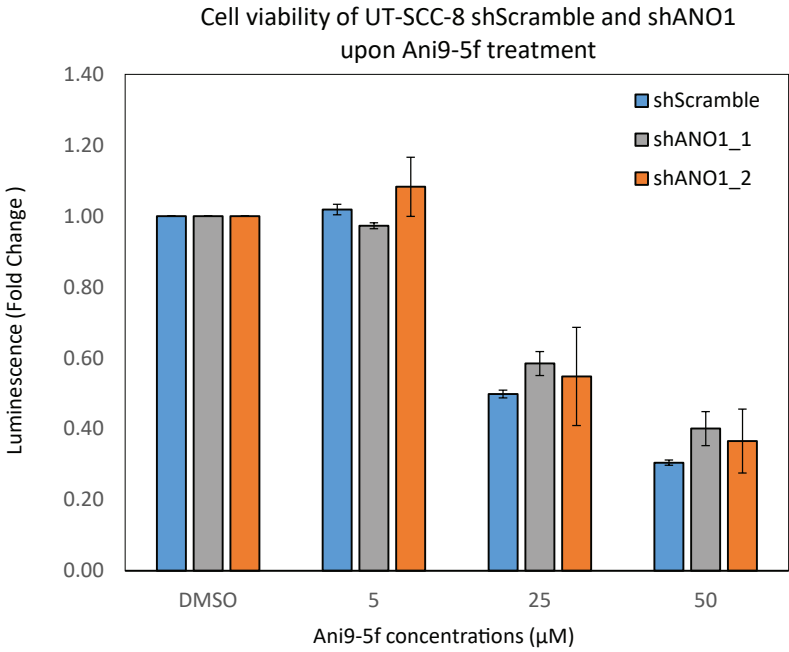

**B**

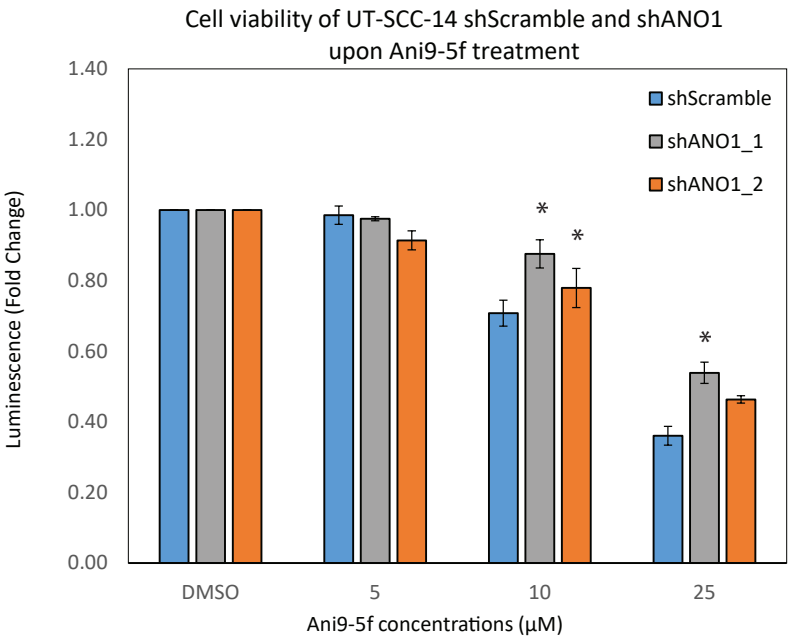

Figure S6

A

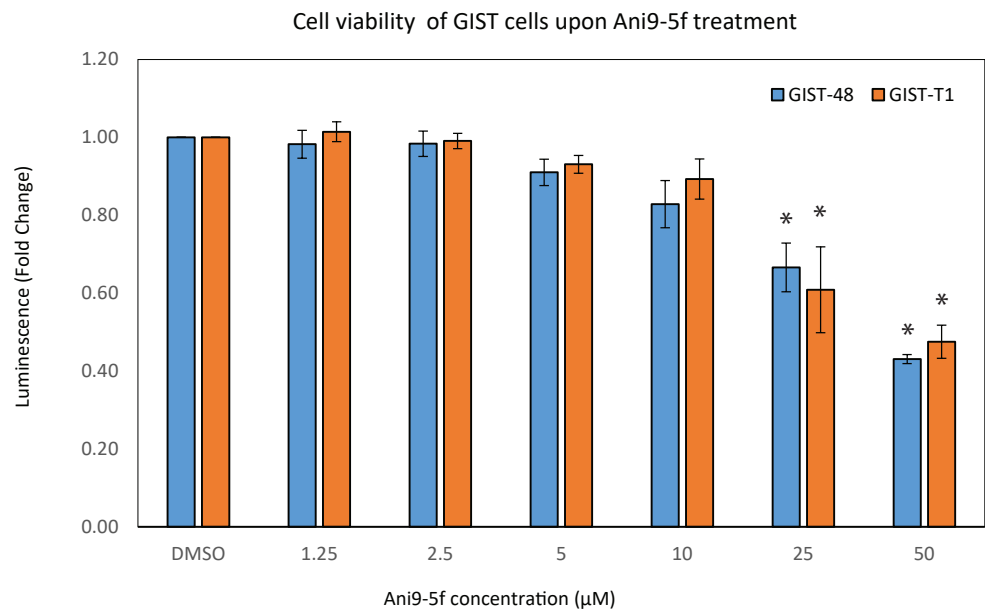

B

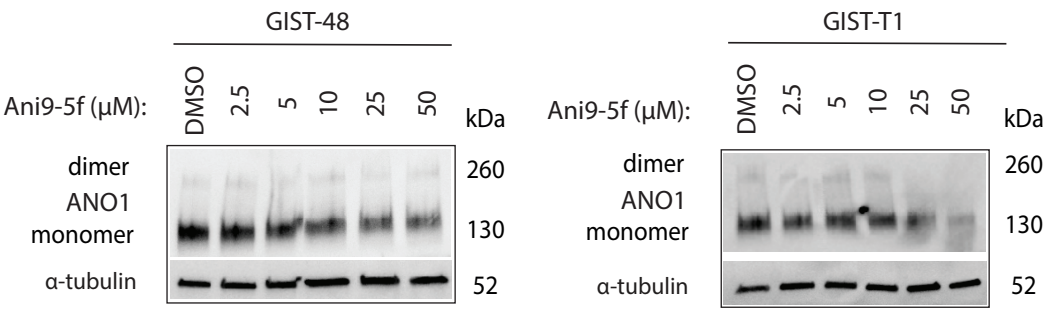

**Figure S7** Uncropped blots of Figure 1A.  
 Immunoblot analysis of the proteins ANO1 and  $\alpha$ -tubulin from a panel of ANO1-high/-low UT-SCC cell lines. Cell lines were selected based on their varying ANO1 mRNA expression (see Figure S1 and Lepikhova et al., 2018). Alpha-tubulin was used as the loading control to normalize the quantities of the proteins. Immunoblot figures, densitometry readings and normalized values are presented in the table below.

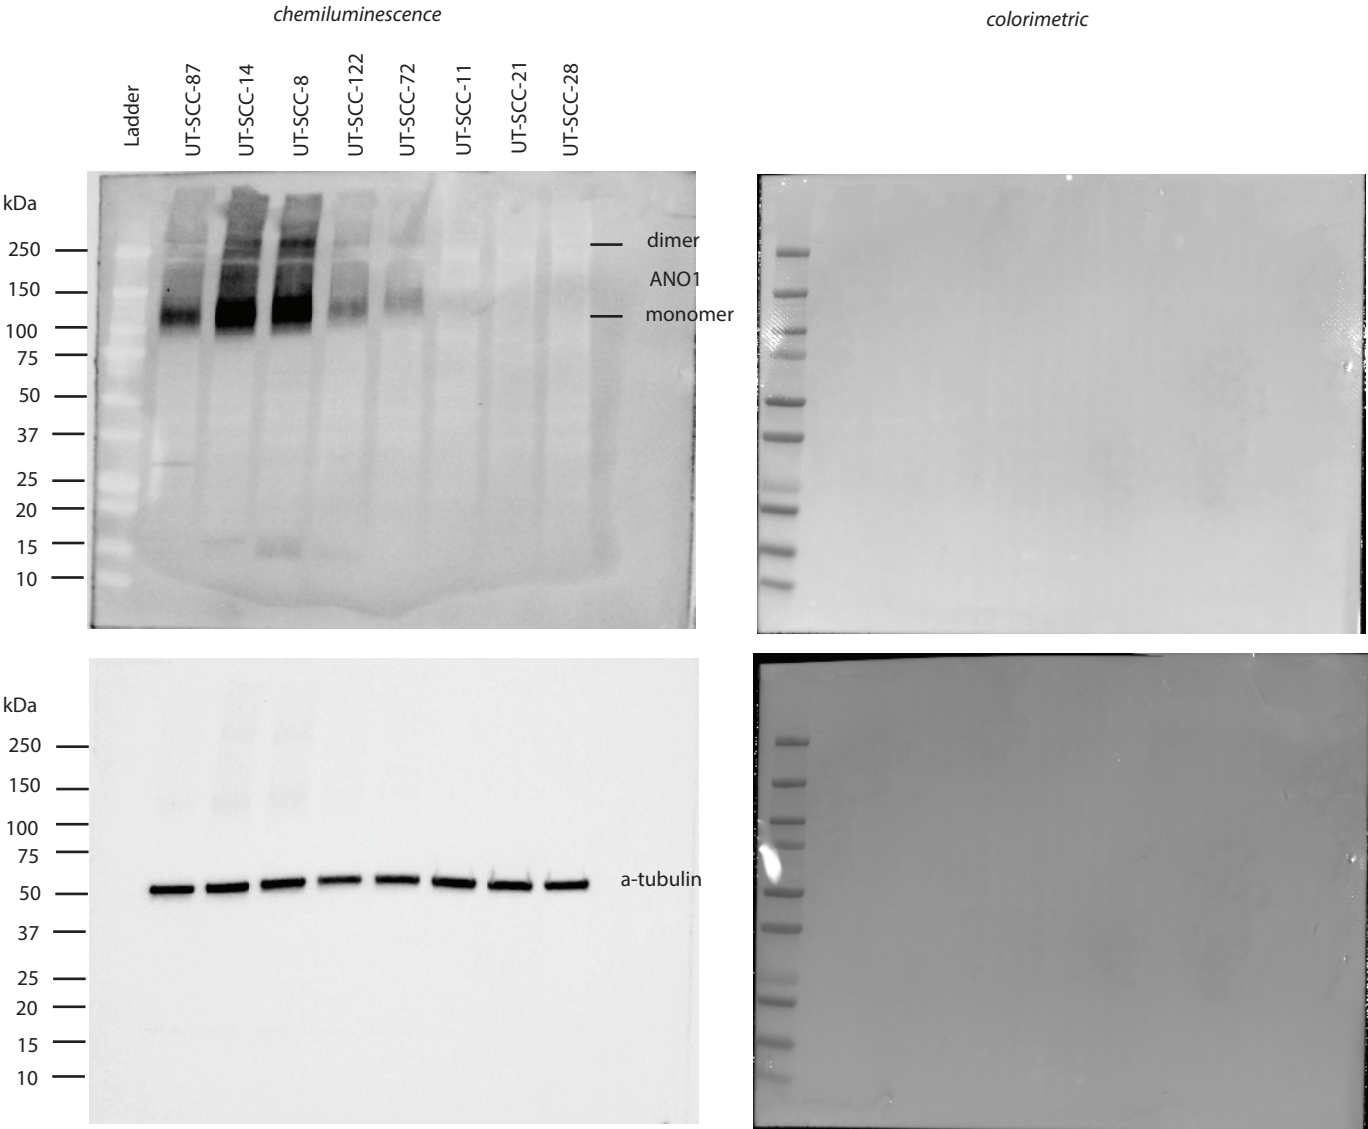

|                   | Intensity of each band (background adjusted) |           |          |            |           |           |           |           |
|-------------------|----------------------------------------------|-----------|----------|------------|-----------|-----------|-----------|-----------|
|                   | UT-SCC-87                                    | UT-SCC-14 | UT-SCC-8 | UT-SCC-122 | UT-SCC-72 | UT-SCC-11 | UT-SCC-21 | UT-SCC-28 |
| ANO1              | 2122120                                      | 4222667   | 4081735  | 1125580    | 719798    | 92608     | 25521     | 16267     |
| $\alpha$ -tubulin | 2167346                                      | 2171457   | 2001814  | 1308144    | 1489957   | 1881457   | 1921531   | 1677118   |
| Intensity ratio   | 0.98                                         | 1.94      | 2.04     | 0.86       | 0.48      | 0.05      | 0.01      | 0.01      |

**Figure S7** Uncropped blots of Figure 1C.  
 Immunoblot analysis of the proteins E-cadherin, N-cadherin, BMI1 in cell lines UT-SCC-8 shScramble and shANO1\_1, shANO1\_2, as well as UT-SCC-14 shScramble and shANO1\_1, shANO1\_2. Alpha-tubulin or GAPDH were used as the loading controls to normalize the quantities of the proteins. Densitometry readings and normalized values are presented in the table under the whole blots.

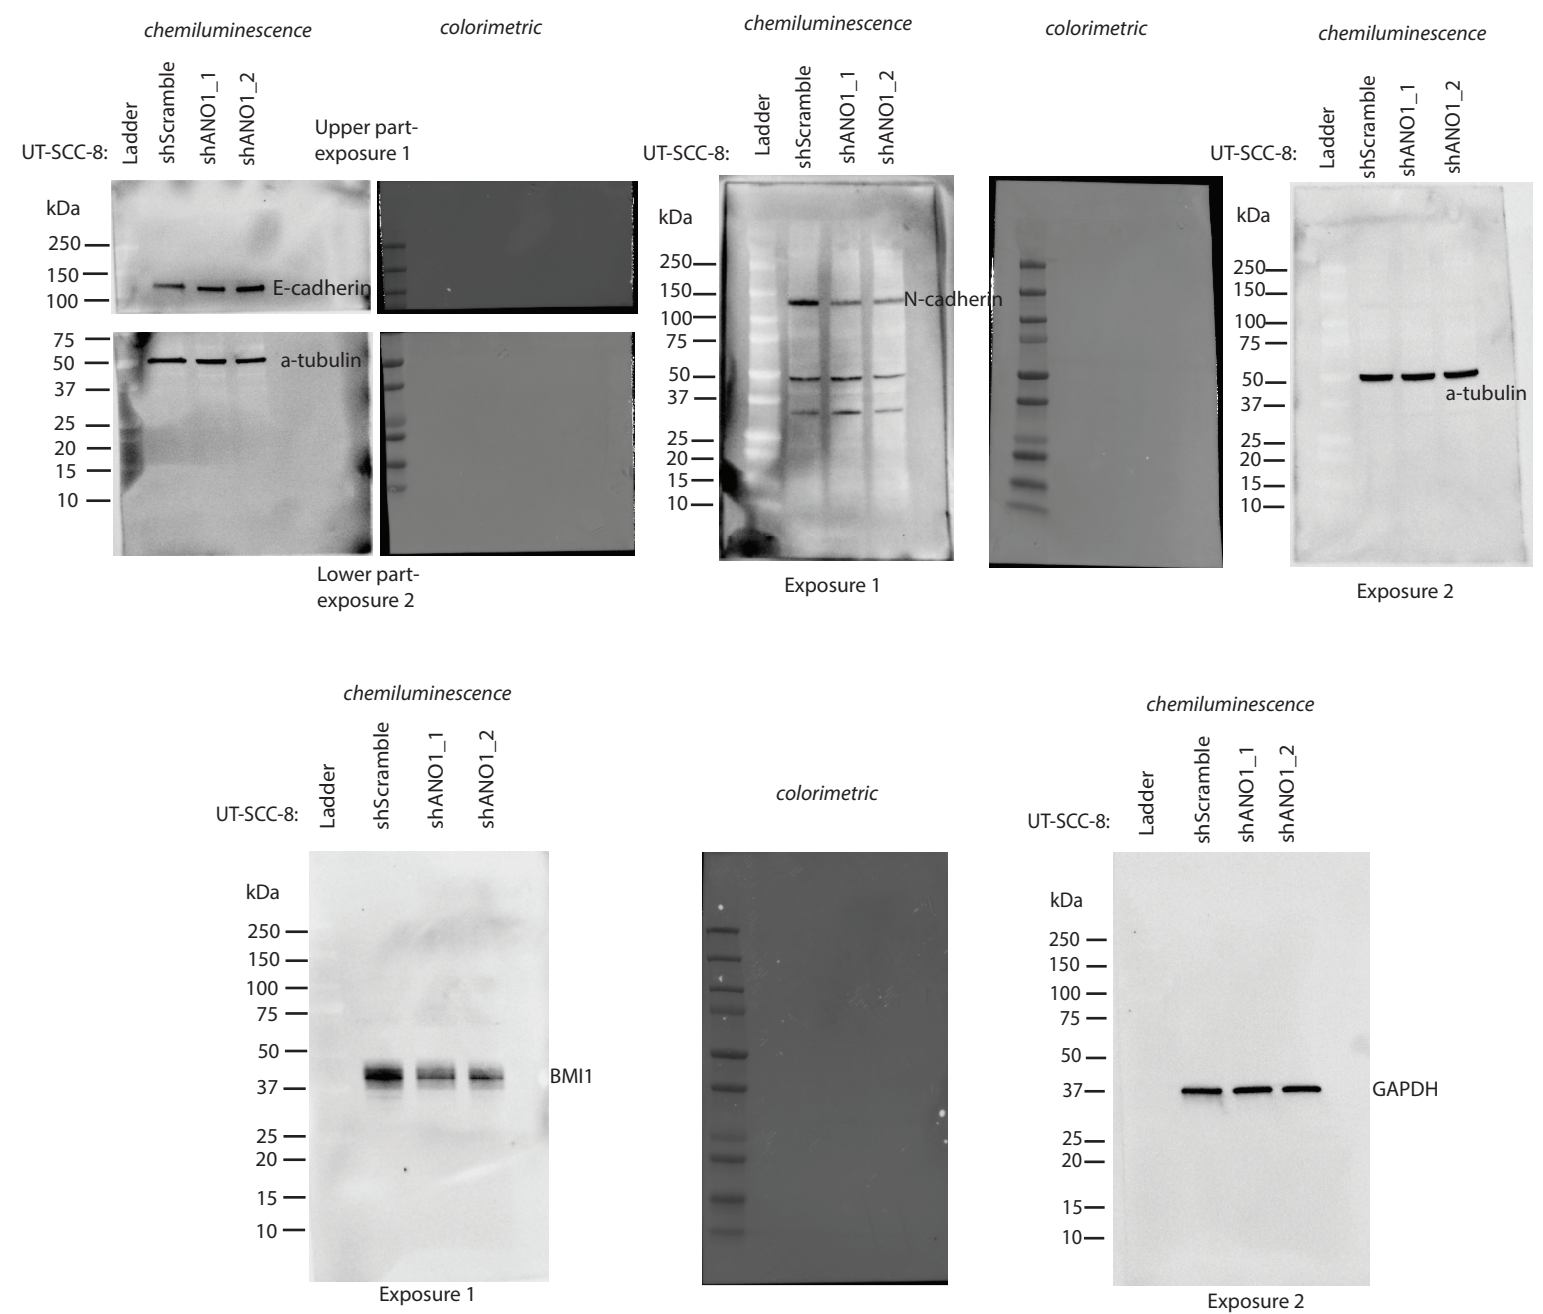

|                 | Intensity of each band (background adjusted) |                      |                      |
|-----------------|----------------------------------------------|----------------------|----------------------|
|                 | UT-SCC-8<br>shScramble                       | UT-SCC-8<br>shANO1_1 | UT-SCC-8<br>shANO1_2 |
| E-cadherin      | 754248                                       | 1019701              | 1559675              |
| α-tubulin       | 1196417                                      | 1497757              | 1369201              |
| Intensity ratio | 0.63                                         | 0.68                 | 1.14                 |
| N-cadherin      | 722962                                       | 16034                | 3697                 |
| α-tubulin       | 1517226                                      | 1558147              | 1609075              |
| Intensity ratio | 0.477                                        | 0.010                | 0.002                |
| BMI1            | 4807371                                      | 2355650              | 2474908              |
| α-tubulin       | 1587335                                      | 1742467              | 1626584              |
| Intensity ratio | 3.03                                         | 1.35                 | 1.52                 |



**Figure S7** Uncropped blots of Figure 1C.

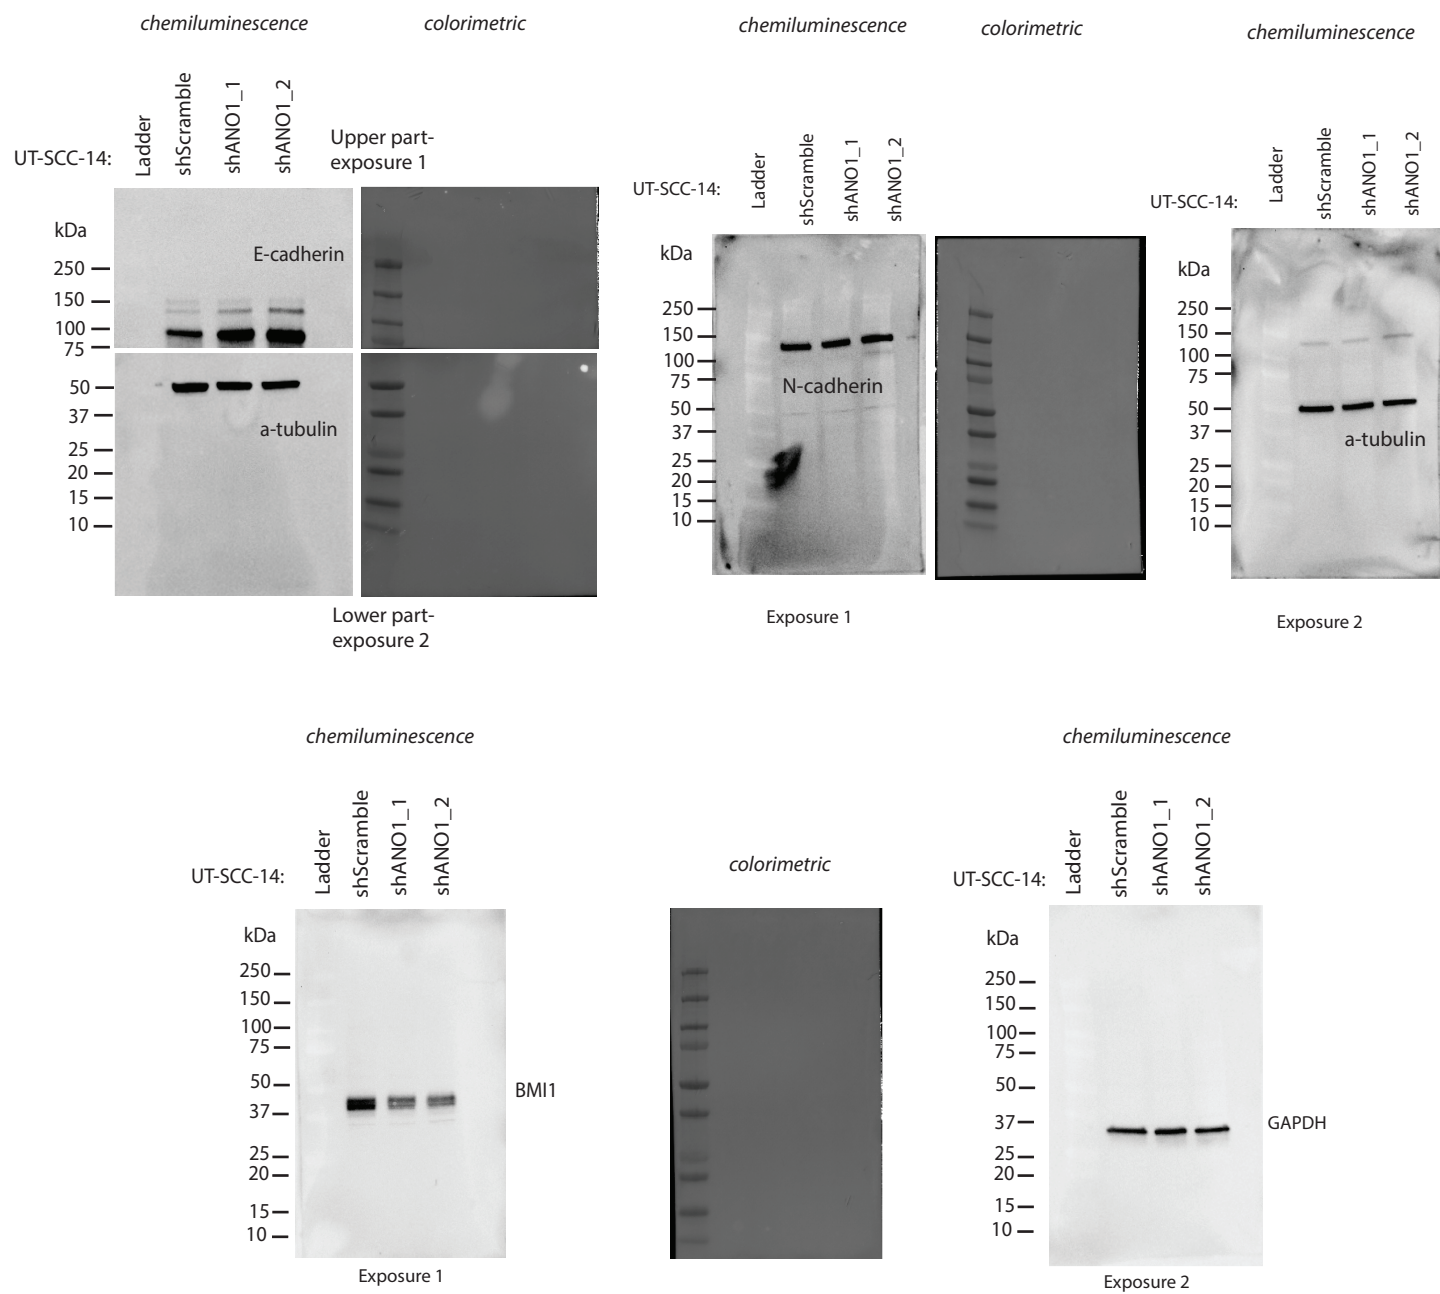

|                   | Intensity of each band (background adjusted) |                       |                       |
|-------------------|----------------------------------------------|-----------------------|-----------------------|
|                   | UT-SCC-14<br>shScramble                      | UT-SCC-14<br>shANO1_1 | UT-SCC-14<br>shANO1_2 |
| E-cadherin        | 1123628                                      | 2484411               | 3173673               |
| $\alpha$ -tubulin | 2054479                                      | 1696848               | 1854173               |
| Intensity ratio   | 0.55                                         | 1.46                  | 1.71                  |
| N-cadherin        | 1129594                                      | 835372                | 1641356               |
| $\alpha$ -tubulin | 1819949                                      | 1381151               | 1466748               |
| Intensity ratio   | 0.62                                         | 0.60                  | 1.12                  |
| BMI1              | 4752423                                      | 2702459               | 2518232               |
| GAPDH             | 1926586                                      | 1840563               | 1691702               |
| Intensity ratio   | 2.47                                         | 1.47                  | 1.49                  |

**Figure S7** Uncropped blots of Figure 2B.  
 Immunoblot analysis of the proteins MCL-1, BCL-2, BCL-XL and BIM in cell lines UT-SCC-8 shScramble and shANO1\_1, shANO1\_2, as well as UT-SCC-14 shScramble and shANO1\_1, shANO1\_2. Alpha-tubulin was used as the loading control to normalize the quantities of the proteins. Densitometry readings and normalized values are presented in the tables under the respective figures.

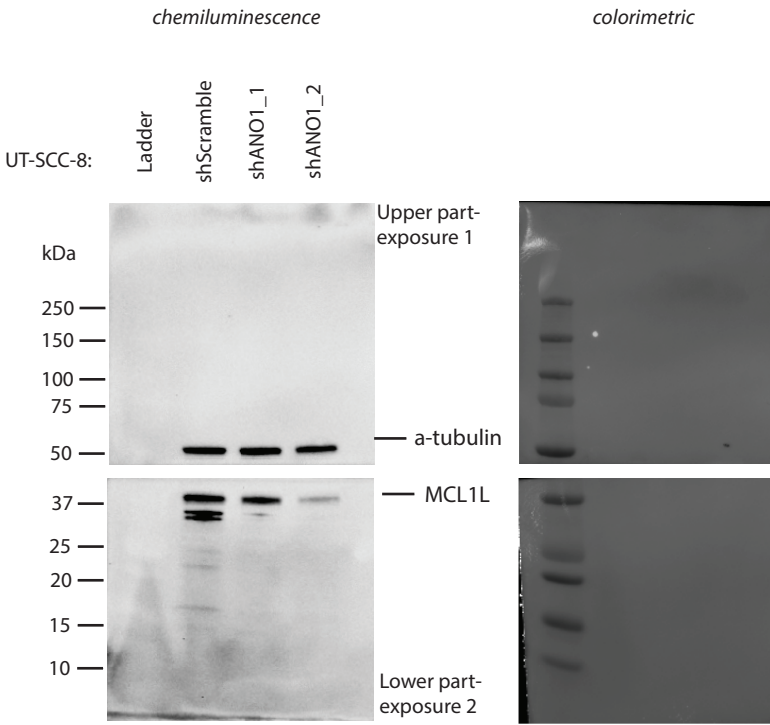

|                   | Intensity of each band (background adjusted) |                   |                   |
|-------------------|----------------------------------------------|-------------------|-------------------|
|                   | UT-SCC-8 shScramble                          | UT-SCC-8 shANO1_1 | UT-SCC-8 shANO1_2 |
| MCL1L             | 1379494                                      | 1043672           | 315049            |
| $\alpha$ -tubulin | 2163007                                      | 2363063           | 1671994           |
| Intensity ratio   | 0.64                                         | 0.44              | 0.19              |



**Figure S7** Uncropped blots of Figure 2B.

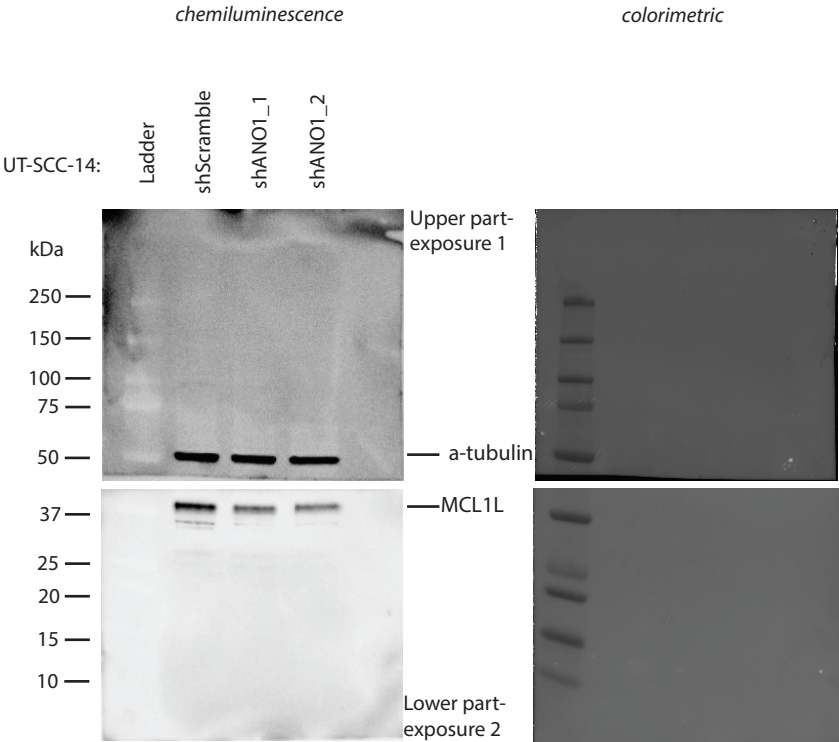

|                   | Intensity of each band (background adjusted) |                       |                       |
|-------------------|----------------------------------------------|-----------------------|-----------------------|
|                   | UT-SCC-14<br>shScramble                      | UT-SCC-14<br>shANO1_1 | UT-SCC-14<br>shANO1_2 |
| MCL1L             | 1748141                                      | 747115                | 617846                |
| $\alpha$ -tubulin | 1783245                                      | 1259613               | 996603                |
| Intensity ratio   | 0.98                                         | 0.59                  | 0.62                  |

**Figure S7** Uncropped blots of Figure 2B.

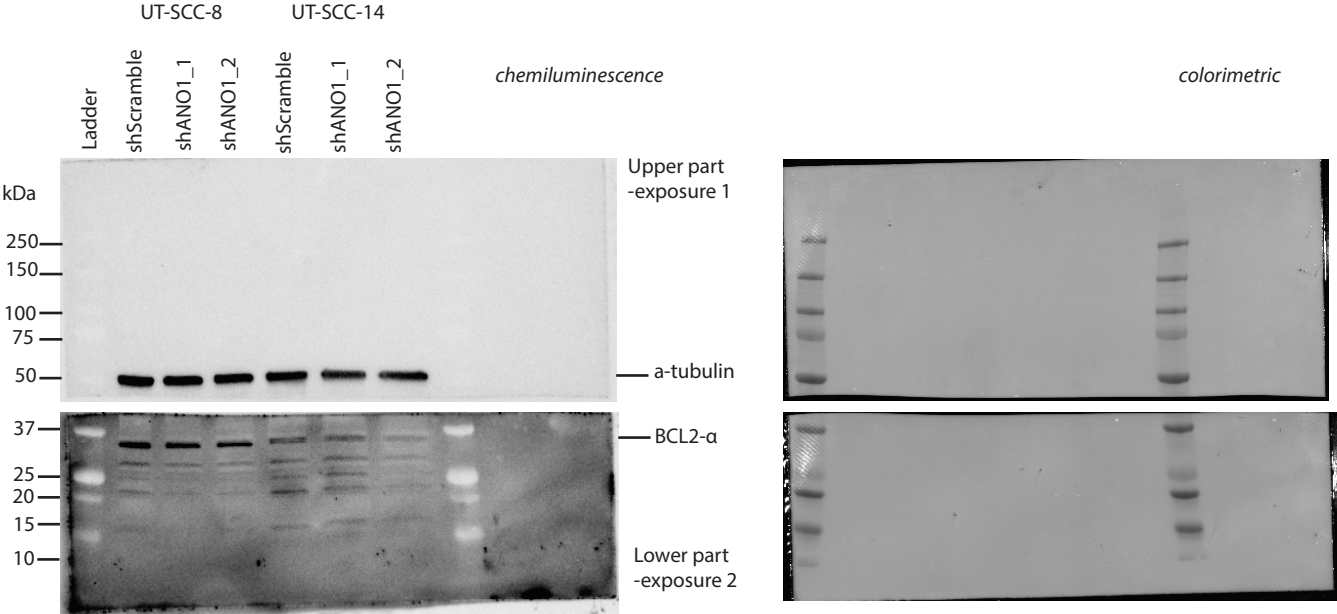

|                 | Intensity of each band (background adjusted) |                      |                      |                         |                       |                       |
|-----------------|----------------------------------------------|----------------------|----------------------|-------------------------|-----------------------|-----------------------|
|                 | UT-SCC-8<br>shScramble                       | UT-SCC-8<br>shANO1_1 | UT-SCC-8<br>shANO1_2 | UT-SCC-14<br>shScramble | UT-SCC-14<br>shANO1_1 | UT-SCC-14<br>shANO1_2 |
| BCL2-α          | 770898                                       | 547671               | 495145               | 178472                  | 136895                | 90218                 |
| α-tubulin       | 2302198                                      | 2155391              | 2034745              | 1694849                 | 1371401               | 1413635               |
| Intensity ratio | 0.33                                         | 0.25                 | 0.24                 | 0.11                    | 0.10                  | 0.06                  |

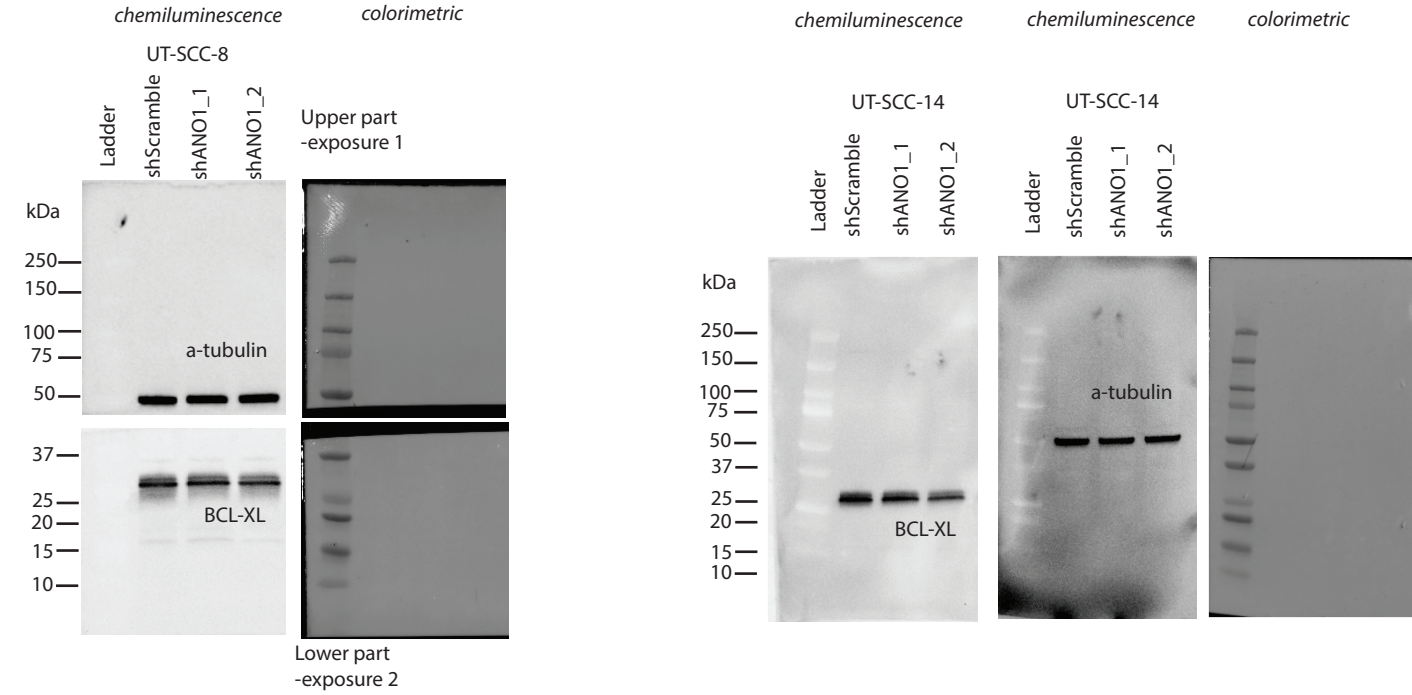

|                 | Intensity of each band (background adjusted) |                      |                      |
|-----------------|----------------------------------------------|----------------------|----------------------|
|                 | UT-SCC-8<br>shScramble                       | UT-SCC-8<br>shANO1_1 | UT-SCC-8<br>shANO1_2 |
| BCL-XL          | 3255706                                      | 2582922              | 2712684              |
| α-tubulin       | 2068165                                      | 1959181              | 1760224              |
| Intensity ratio | 1.57                                         | 1.32                 | 1.54                 |

|                 | Intensity of each band (background adjusted) |                       |                       |
|-----------------|----------------------------------------------|-----------------------|-----------------------|
|                 | UT-SCC-14<br>shScramble                      | UT-SCC-14<br>shANO1_1 | UT-SCC-14<br>shANO1_2 |
| BCL-XL          | 2977950                                      | 2804066               | 2099190               |
| α-tubulin       | 1371232                                      | 984975                | 1248328               |
| Intensity ratio | 2.17                                         | 2.85                  | 1.68                  |

**Figure S7** Uncropped blots of Figure 2B.

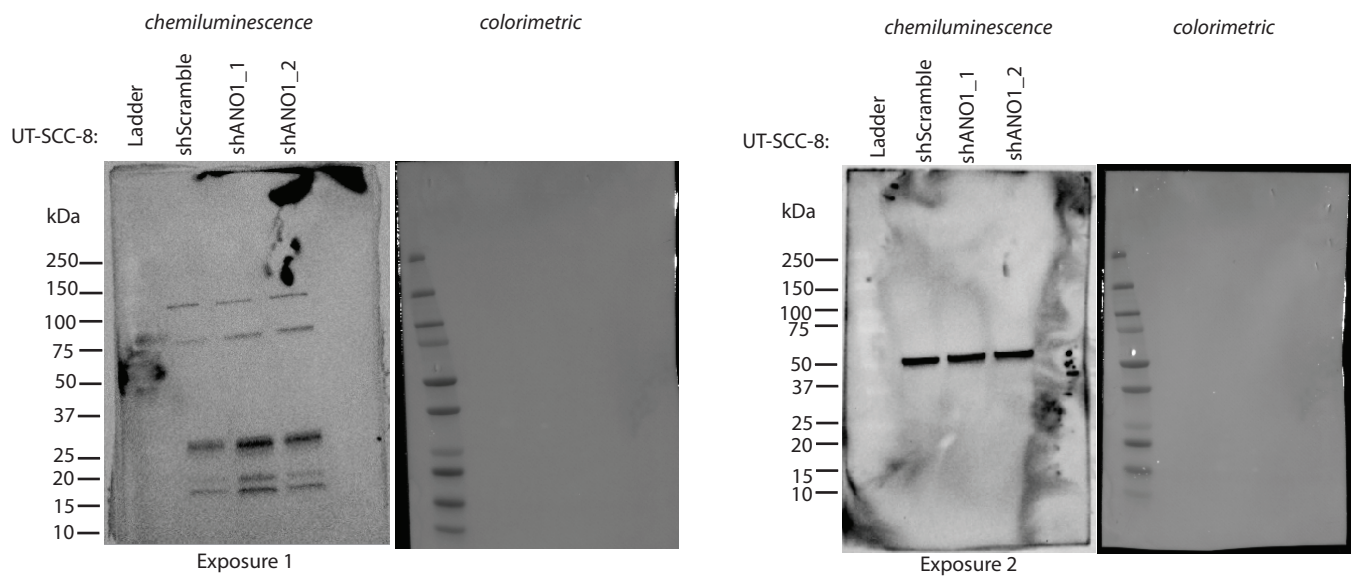

|                   | Intensity of each band (background adjusted) |                      |                      |
|-------------------|----------------------------------------------|----------------------|----------------------|
|                   | UT-SCC-8<br>shScramble                       | UT-SCC-8<br>shANO1_1 | UT-SCC-8<br>shANO1_2 |
| BIM               | 129874                                       | 261924               | 221288               |
| $\alpha$ -tubulin | 1281083                                      | 1182915              | 1069172              |
| Intensity ratio   | 0.10                                         | 0.22                 | 0.21                 |

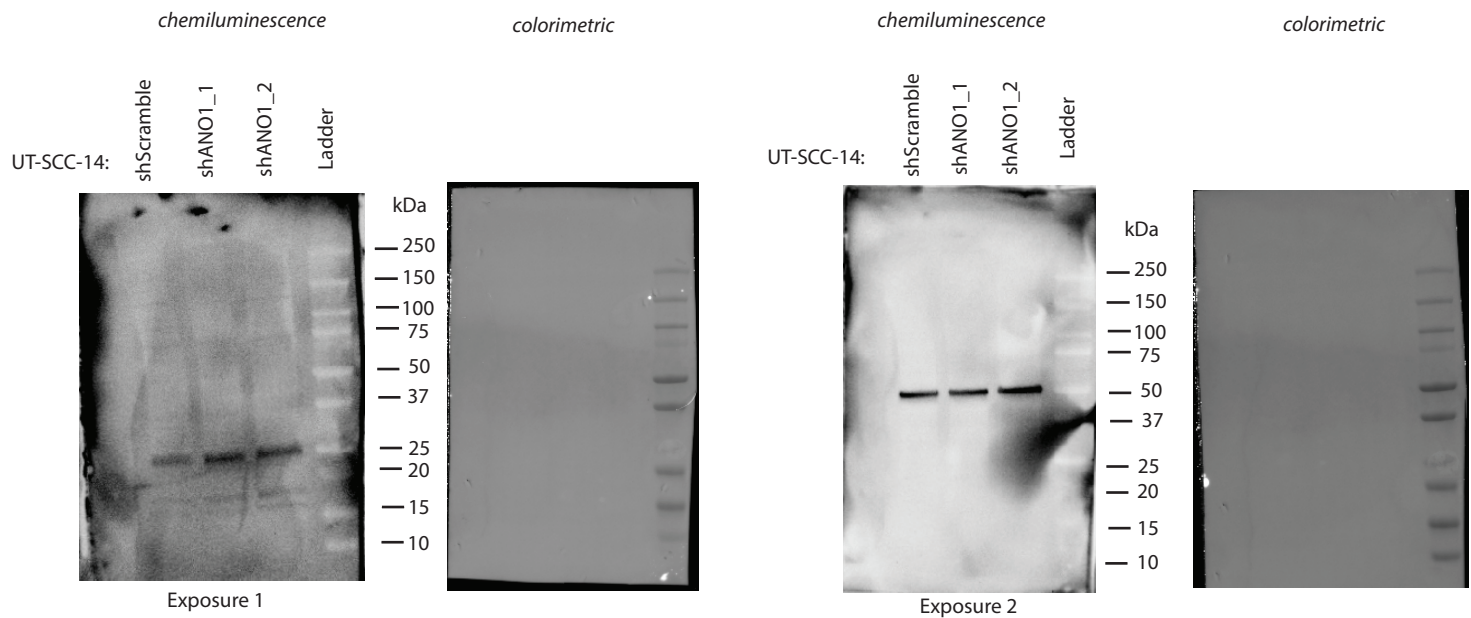

|                   | Intensity of each band (background adjusted) |                       |                       |
|-------------------|----------------------------------------------|-----------------------|-----------------------|
|                   | UT-SCC-14<br>shScramble                      | UT-SCC-14<br>shANO1_1 | UT-SCC-14<br>shANO1_2 |
| BIM               | 152245                                       | 285054                | 326040                |
| $\alpha$ -tubulin | 1238184                                      | 1198241               | 1410510               |
| Intensity ratio   | 0.12                                         | 0.24                  | 0.23                  |

**Figure S7** Uncropped blots from Figure 4A.  
 Immunoblot analysis of the protein CDKN1B (p27kip1) in cell lines UT-SCC-8 shScramble and shANO1\_1, shANO1\_2, as well as UT-SCC-14 shScramble and shANO1\_1, shANO1\_2. Alpha-tubulin was used as the control to normalize the quantities of the proteins. Densitometry readings and normalized values are presented in the tables under the respective whole blots.

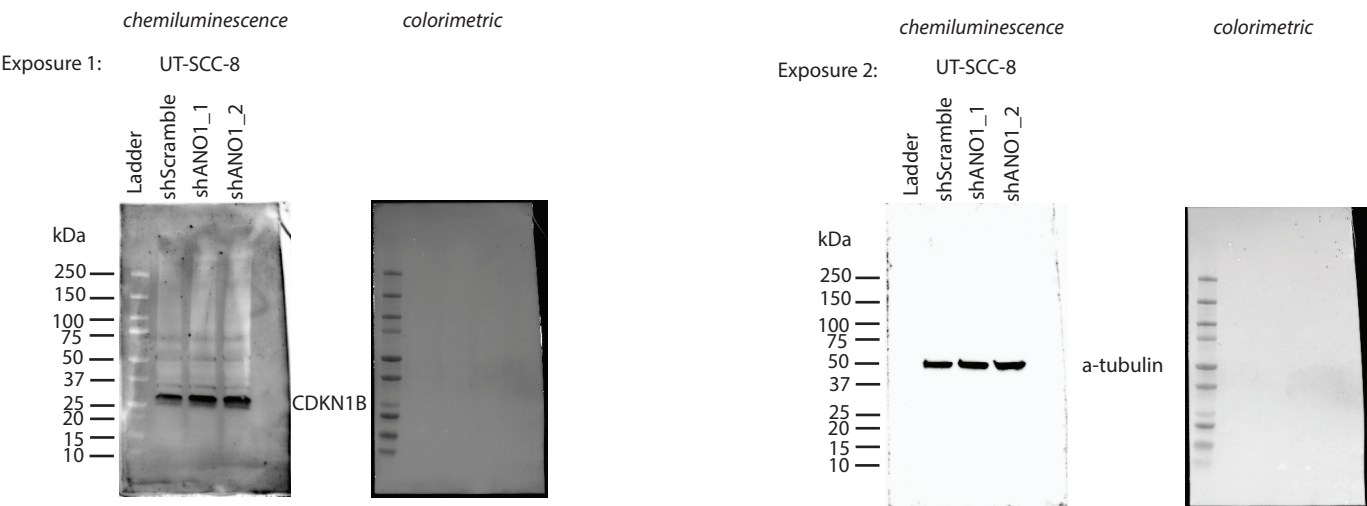

|                 | UT-SCC-8<br>shScramble | UT-SCC-8<br>shANO1_1 | UT-SCC-8<br>shANO1_2 |
|-----------------|------------------------|----------------------|----------------------|
| CDKN1B          | 6954665                | 9387748              | 10598253             |
| α-tubulin       | 14466840               | 16481549             | 17634530             |
| Intensity ratio | 0.48                   | 0.57                 | 0.60                 |

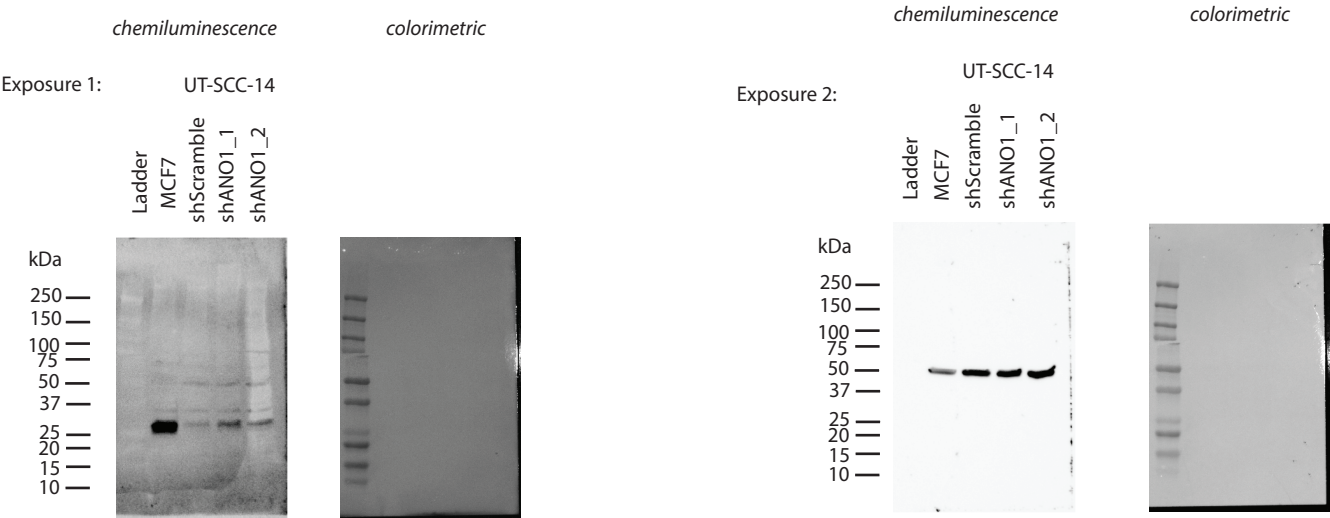

|                 | MCF7    | Intensity of each band (background adjusted) |                       |                       |
|-----------------|---------|----------------------------------------------|-----------------------|-----------------------|
|                 | MCF7    | UT-SCC-14<br>shScramble                      | UT-SCC-14<br>shANO1_1 | UT-SCC-14<br>shANO1_2 |
| CDKN1B          | 1465825 | 129064                                       | 330047                | 198153                |
| α-tubulin       | 2625200 | 5544654                                      | 5449901               | 7602643               |
| Intensity ratio | 0.56    | 0.02                                         | 0.06                  | 0.03                  |

\*MCF7 was used as positive control for the antibody



**Figure S7** Addition uncropped blots (not included in Main Figure), showing the same result as Figure 4A. Immunoblot analysis of the protein CDKN1B (p27kip1) in cell lines UT-SCC-8 shScramble and shANO1\_1, shANO1\_2, as well as UT-SCC-14 shScramble and shANO1\_1, shANO1\_2. Alpha-tubulin was used as the control to normalize the quantities of the proteins. Densitometry readings and normalized values are presented in the tables under the whole blots.

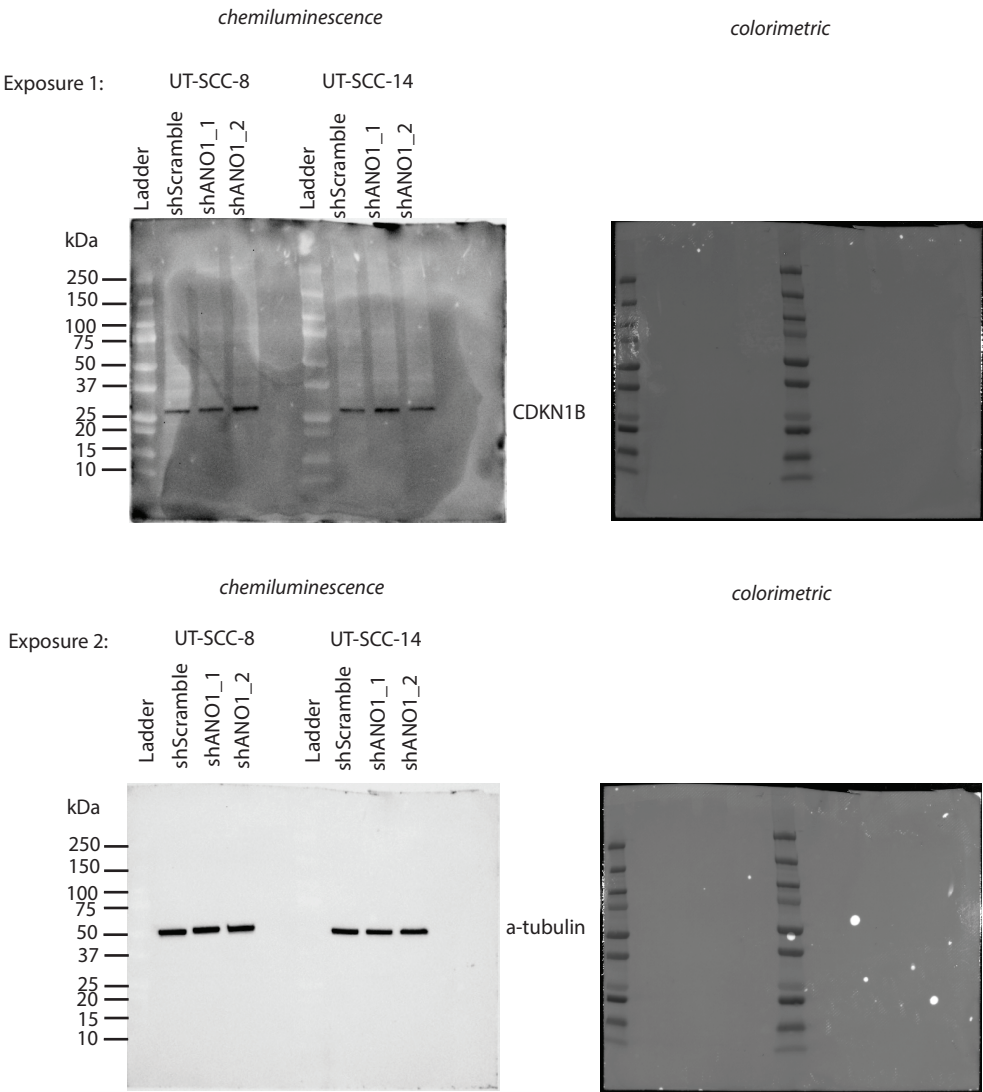

|                   | Intensity of each band (background adjusted) |                      |                      |                         |                       |                       |
|-------------------|----------------------------------------------|----------------------|----------------------|-------------------------|-----------------------|-----------------------|
|                   | UT-SCC-8<br>shScramble                       | UT-SCC-8<br>shANO1_1 | UT-SCC-8<br>shANO1_2 | UT-SCC-14<br>shScramble | UT-SCC-14<br>shANO1_1 | UT-SCC-14<br>shANO1_2 |
| CDKN1B            | 126132                                       | 289606               | 613225               | 320905                  | 657558                | 466882                |
| $\alpha$ -tubulin | 2317065                                      | 1972136              | 1882290              | 1681519                 | 1461723               | 1454817               |
| Intensity ratio   | 0.05                                         | 0.15                 | 0.33                 | 0.19                    | 0.45                  | 0.32                  |

**Figure S7** Uncropped blots of Figure 4B.  
 Immunoblot analysis of the proteins CDKN1B, H2A.x, a-tubulin, MCL1 in the cytoplasmic and nuclear fraction of the cell lines UT-SCC-8 shScramble and shANO1\_1, shANO1\_2, as well as UT-SCC-14 shScramble and shANO1\_1, shANO1\_2. Densitometry readings and normalized values are presented in the tables under the respective whole blots.

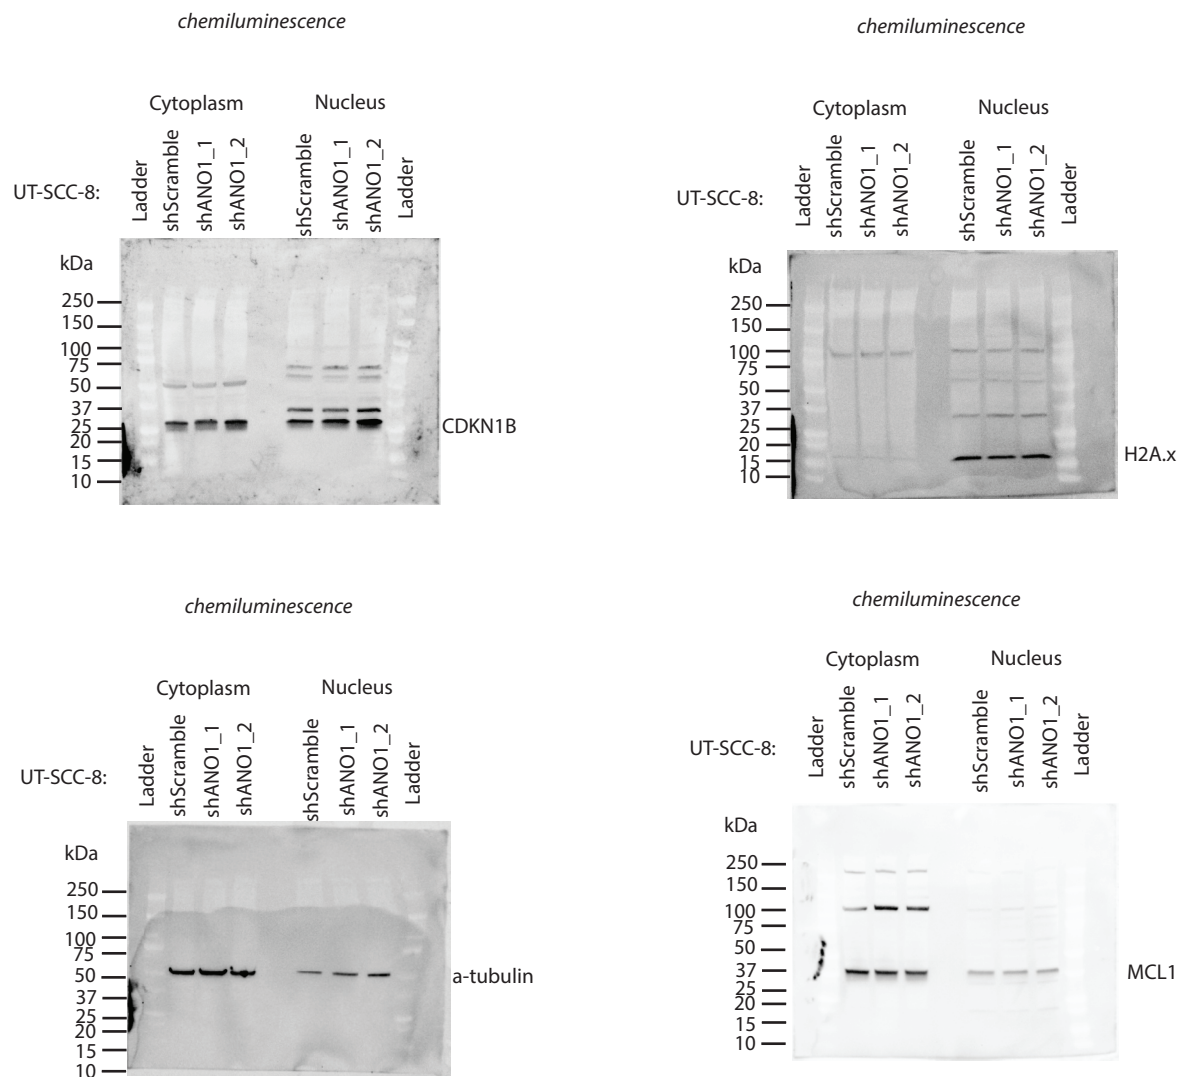

|                                   | Intensity of each band (background adjusted) |                                     |                                     |                                   |                                 |                                 |
|-----------------------------------|----------------------------------------------|-------------------------------------|-------------------------------------|-----------------------------------|---------------------------------|---------------------------------|
|                                   | UT-SCC-8<br>shScramble<br>cytoplasmic        | UT-SCC-8<br>shANO1_1<br>cytoplasmic | UT-SCC-8<br>shANO1_2<br>cytoplasmic | UT-SCC-8<br>shScramble<br>nuclear | UT-SCC-8<br>shANO1_1<br>nuclear | UT-SCC-8<br>shANO1_2<br>nuclear |
| CDKN1B                            | 1613620                                      | 1726694                             | 2195320                             | 1775510                           | 2390283                         | 3665279                         |
| α-tubulin                         | 1246482                                      | 1382003                             | 1150454                             | 289300                            | 417286                          | 468484                          |
| H2Ax                              | 17221                                        | 25344                               | 1668                                | 605133                            | 414028                          | 562209                          |
| Intensity ratio<br>(to a-tubulin) | 1.29                                         | 1.25                                | 1.91                                | 6.14                              | 5.73                            | 7.82                            |
| Intensity ratio<br>(to H2Ax)      | 93.70                                        | 68.13                               | 1316.39                             | 2.93                              | 5.77                            | 6.52                            |
| MCL1                              | 881311                                       | 854091                              | 636320                              | 142116                            | 63535                           | 115539                          |
| Intensity ratio<br>(to a-tubulin) | 0.71                                         | 0.62                                | 0.55                                | 0.49                              | 0.15                            | 0.25                            |
| Intensity ratio<br>(to H2Ax)      | 51.18                                        | 33.70                               | 381.56                              | 0.23                              | 0.15                            | 0.21                            |

**Figure S7** Uncropped blots of Figure 4B.

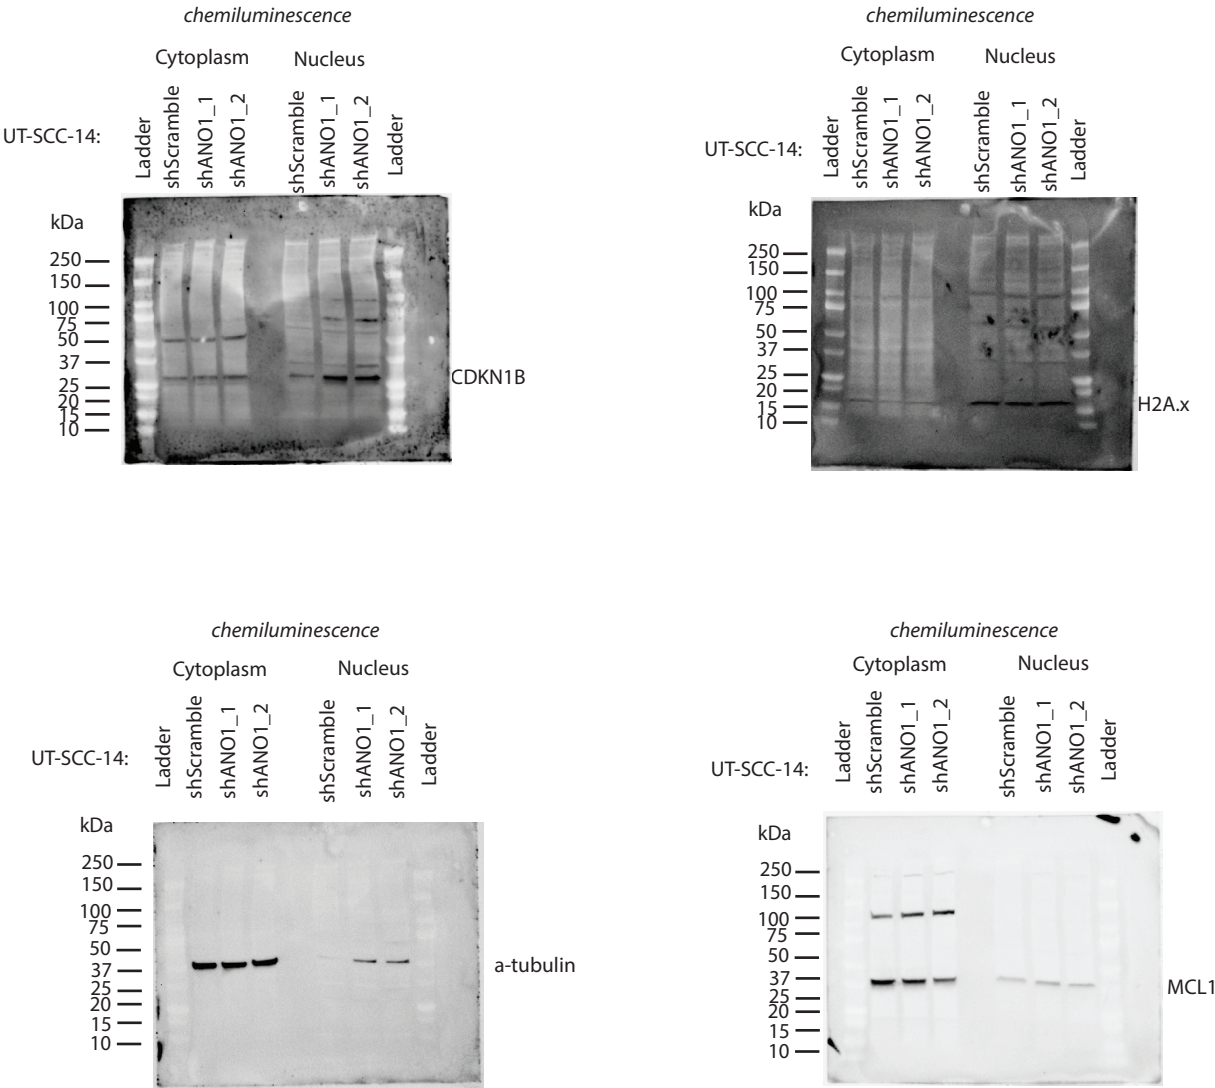

|                                   | Intensity of each band (background adjusted) |                                      |                                      |                                    |                                  |                                  |
|-----------------------------------|----------------------------------------------|--------------------------------------|--------------------------------------|------------------------------------|----------------------------------|----------------------------------|
|                                   | UT-SCC-14<br>shScramble<br>cytoplasmic       | UT-SCC-14<br>shANO1_1<br>cytoplasmic | UT-SCC-14<br>shANO1_2<br>cytoplasmic | UT-SCC-14<br>shScramble<br>nuclear | UT-SCC-14<br>shANO1_1<br>nuclear | UT-SCC-14<br>shANO1_2<br>nuclear |
| CDKN1B                            | 251426                                       | 426953                               | 620078                               | 358407                             | 1449579                          | 1448372                          |
| α-tubulin                         | 2060382                                      | 1483864                              | 1791450                              | 1430                               | 300191                           | 348997                           |
| H2Ax                              | 7683                                         | 11107                                | 241691                               | 2962334                            | 945262                           | 1820972                          |
| Intensity ratio<br>(to α-tubulin) | 0.12                                         | 0.29                                 | 0.35                                 | 250.71                             | 4.83                             | 4.15                             |
| Intensity ratio<br>(to H2Ax)      | 32.72                                        | 38.44                                | 2.57                                 | 0.12                               | 1.53                             | 0.80                             |
| MCL1                              | 574987                                       | 547793                               | 318055                               | 28143                              | 90272                            | 105174                           |
| Intensity ratio<br>(to α-tubulin) | 0.28                                         | 0.37                                 | 0.18                                 | 19.69                              | 0.30                             | 0.30                             |
| Intensity ratio<br>(to H2Ax)      | 74.84                                        | 49.32                                | 1.32                                 | 0.01                               | 0.10                             | 0.06                             |

**Figure S7** Uncropped blots of Figure 5A.  
 Immunoblot analysis of ANO1 and a-tubulin upon treatment with a range of concentrations of Ani9-5f inhibitor. Cell lines used were UT-SCC-8 and UT-SCC-14. Densitometry readings and normalized values are presented in the tables under the respective figures.

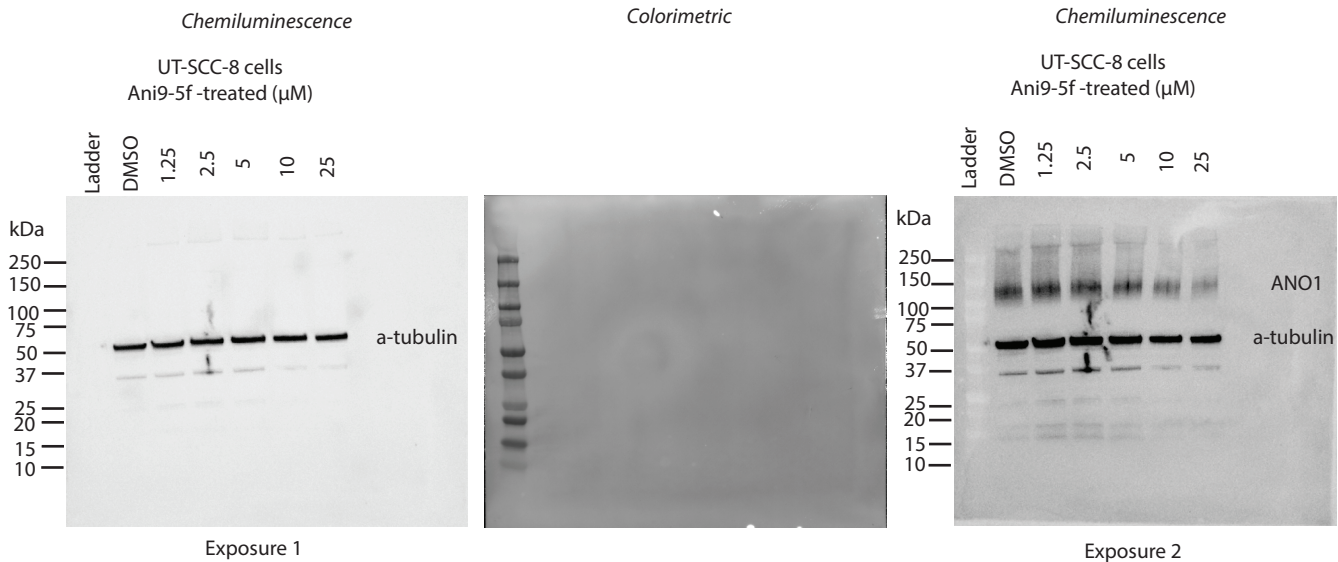

|                                   | Intensity of each band (background adjusted) |                     |                    |                  |                   |                   |
|-----------------------------------|----------------------------------------------|---------------------|--------------------|------------------|-------------------|-------------------|
|                                   | UT-SCC-8<br>DMSO                             | UT-SCC-8<br>1.25 μM | UT-SCC-8<br>2.5 μM | UT-SCC-8<br>5 μM | UT-SCC-8<br>10 μM | UT-SCC-8<br>25 μM |
| ANO1 (monomer)                    | 1413815                                      | 1505826             | 1255117            | 1224846          | 857044            | 597264            |
| a-tubulin                         | 2036621                                      | 2279962             | 2613640            | 2682535          | 2508756           | 2262548           |
| Intensity ratio<br>(to a-tubulin) | 0.69                                         | 0.66                | 0.48               | 0.46             | 0.34              | 0.26              |

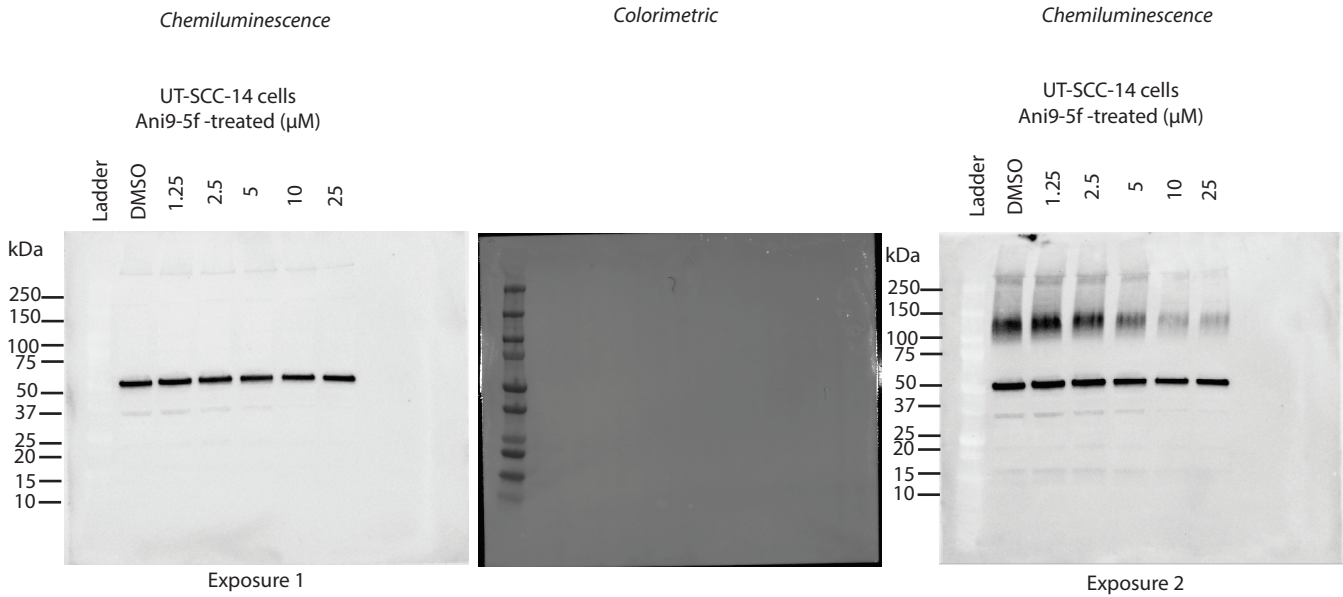

|                                   | Intensity of each band (background adjusted) |                      |                     |                   |                    |                    |
|-----------------------------------|----------------------------------------------|----------------------|---------------------|-------------------|--------------------|--------------------|
|                                   | UT-SCC-14<br>DMSO                            | UT-SCC-14<br>1.25 μM | UT-SCC-14<br>2.5 μM | UT-SCC-14<br>5 μM | UT-SCC-14<br>10 μM | UT-SCC-14<br>25 μM |
| ANO1 (monomer)                    | 6109486                                      | 6747155              | 5586846             | 3730226           | 1799467            | 1720249            |
| a-tubulin                         | 3502227                                      | 3223582              | 2766304             | 2624671           | 2579560            | 2943333            |
| Intensity ratio<br>(to a-tubulin) | 1.74                                         | 2.09                 | 2.02                | 1.42              | 0.70               | 0.58               |



**Figure S7** Uncropped blots of Figure 5C.  
 Immunoblot analysis of changes in proteins ANO1, MCL1, BCL-XL and a-tubulin upon treatment with a range of concentrations of Ani9-5f inhibitor. Cell lines used were UT-SCC-8 and UT-SCC-14. Densitometry readings and normalized values are presented in the tables under the respective whole blots.

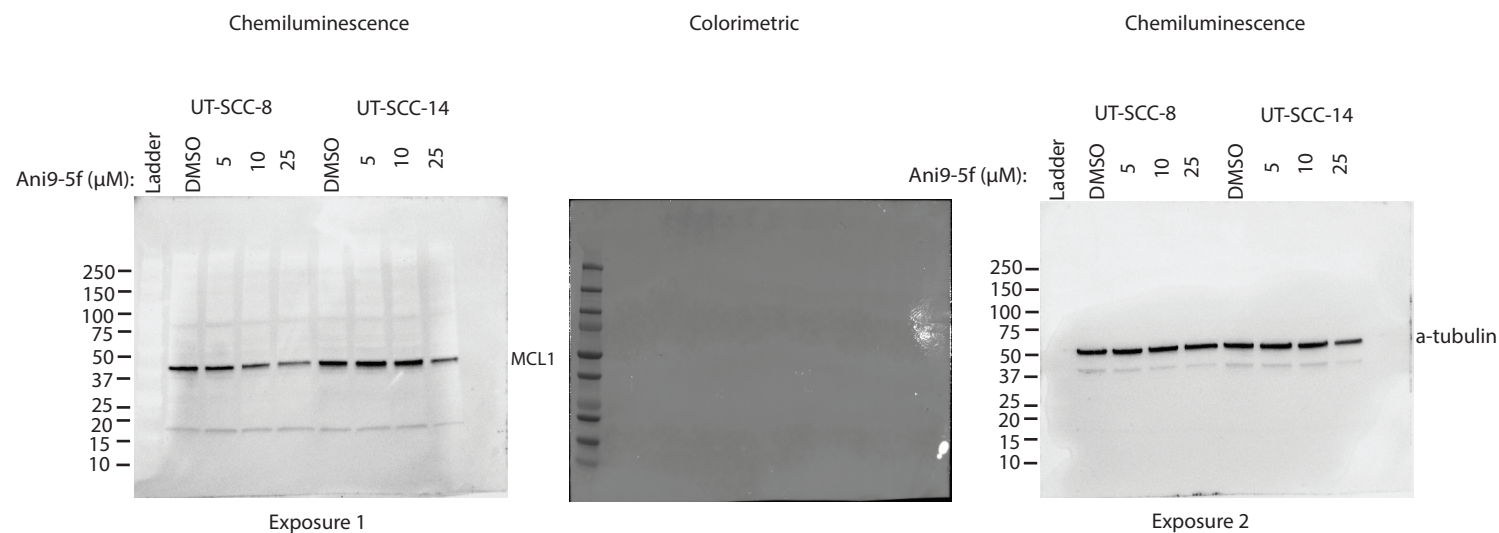

|                                      | Intensity of each band (background adjusted) |                  |                   |                   |                   |                   |                    |                    |
|--------------------------------------|----------------------------------------------|------------------|-------------------|-------------------|-------------------|-------------------|--------------------|--------------------|
|                                      | UT-SCC-8<br>DMSO                             | UT-SCC-8<br>5 μM | UT-SCC-8<br>10 μM | UT-SCC-8<br>25 μM | UT-SCC-14<br>DMSO | UT-SCC-14<br>5 μM | UT-SCC-14<br>10 μM | UT-SCC-14<br>25 μM |
| MCL1                                 | 1643657                                      | 1336736          | 903073            | 740553            | 1606465           | 1938292           | 1870507            | 783287             |
| a-tubulin                            | 1826987                                      | 2126834          | 2015056           | 1881652           | 1947402           | 2064488           | 1888266            | 1242886            |
| Intensity ratio<br>(MCL1/ a-tubulin) | 0.90                                         | 0.63             | 0.45              | 0.39              | 0.82              | 0.94              | 0.99               | 0.63               |

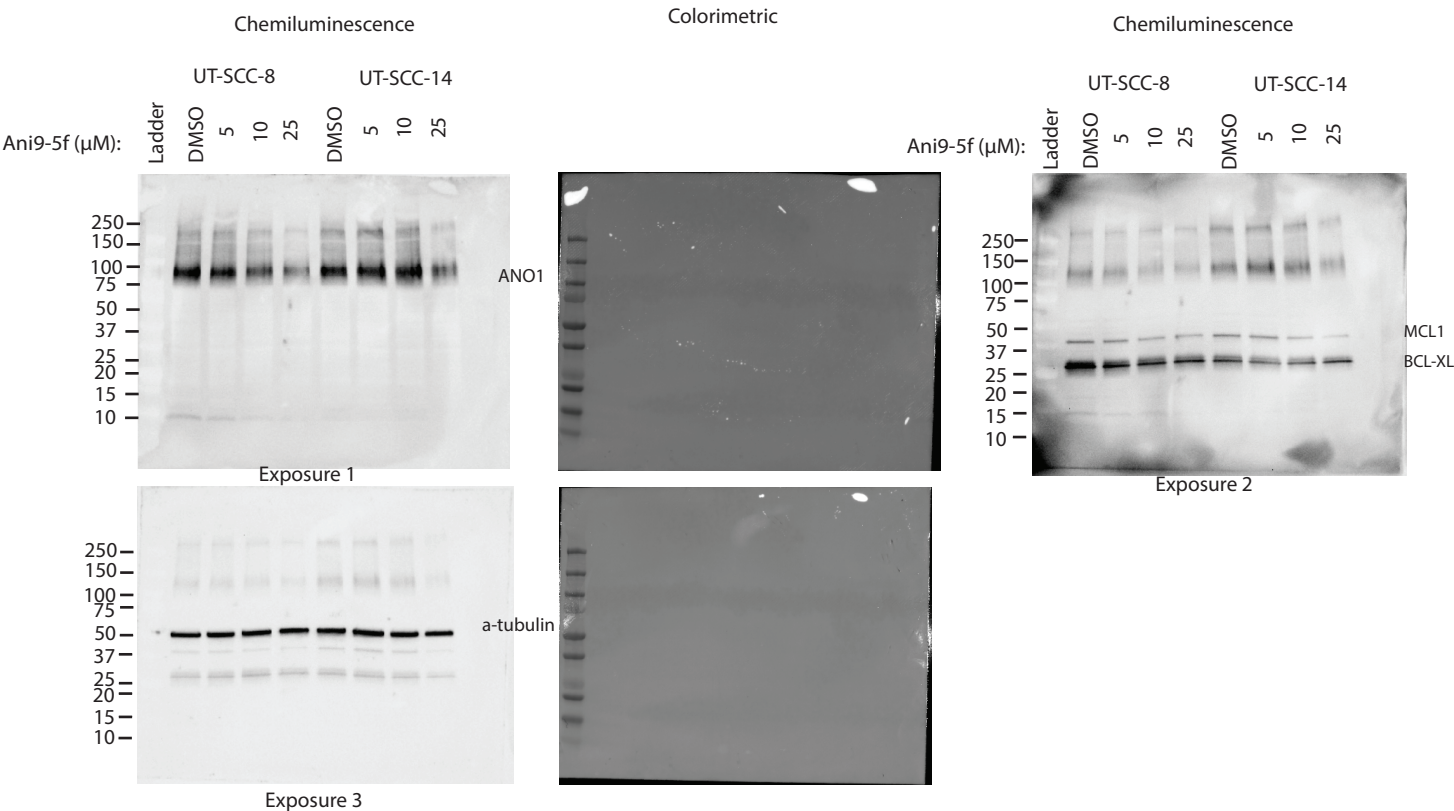

|                                        | Intensity of each band (background adjusted) |                  |                   |                   |                   |                   |                    |                    |
|----------------------------------------|----------------------------------------------|------------------|-------------------|-------------------|-------------------|-------------------|--------------------|--------------------|
|                                        | UT-SCC-8<br>DMSO                             | UT-SCC-8<br>5 μM | UT-SCC-8<br>10 μM | UT-SCC-8<br>25 μM | UT-SCC-14<br>DMSO | UT-SCC-14<br>5 μM | UT-SCC-14<br>10 μM | UT-SCC-14<br>25 μM |
| ANO1 (monomer)                         | 3616714                                      | 3029903          | 2351941           | 1531517           | 3348691           | 3584370           | 3683543            | 2046164            |
| BCL-XL                                 | 3118159                                      | 2293000          | 2184385           | 2045446           | 1884100           | 1462271           | 1367475            | 1392241            |
| a-tubulin                              | 1941652                                      | 2068715          | 2093396           | 2152450           | 2101054           | 2435730           | 2087683            | 1726260            |
| Intensity ratio<br>(ANO1/ a-tubulin)   | 1.86                                         | 1.46             | 1.12              | 0.71              | 1.59              | 1.47              | 1.76               | 1.19               |
| Intensity ratio<br>(BCL-XL/ a-tubulin) | 1.61                                         | 1.11             | 1.04              | 0.95              | 0.90              | 0.60              | 0.66               | 0.81               |

**Figure S7** Uncropped blots of Figure 6B.  
 Immunoblot analysis of the proteins MCL-1, BCL-XL and  $\alpha$ -tubulin from cell lysates of UT-SCC-8 and UT-SCC-14 treated with a range of concentrations of AZD-5991 inhibitor. Alpha-tubulin was used as the control to normalize the quantities of the proteins. Densitometry readings and normalized values are presented in the tables under the respective figures.

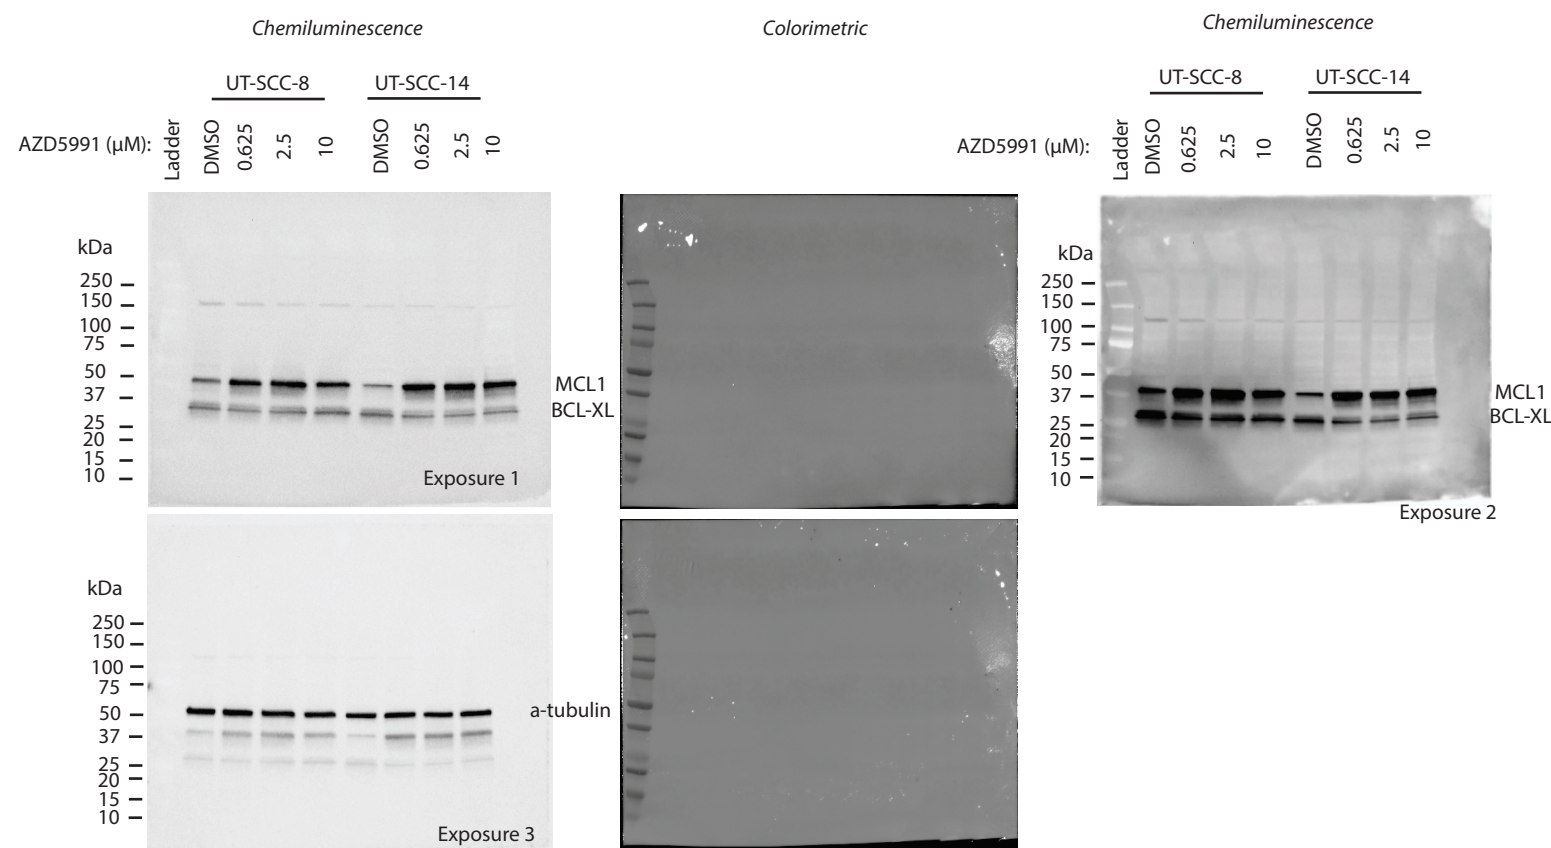

| AZD-5991-treated                               | Intensity of each band (background adjusted) |                           |                         |                        |                   |                            |                          |                         |
|------------------------------------------------|----------------------------------------------|---------------------------|-------------------------|------------------------|-------------------|----------------------------|--------------------------|-------------------------|
|                                                | UT-SCC-8<br>DMSO                             | UT-SCC-8<br>0.625 $\mu$ M | UT-SCC-8<br>2.5 $\mu$ M | UT-SCC-8<br>10 $\mu$ M | UT-SCC-14<br>DMSO | UT-SCC-14<br>0.625 $\mu$ M | UT-SCC-14<br>2.5 $\mu$ M | UT-SCC-14<br>10 $\mu$ M |
| MCL1                                           | 674694                                       | 1607502                   | 2045739                 | 1519667                | 577321            | 2225212                    | 1972098                  | 2007980                 |
| BCL-XL                                         | 7978149                                      | 5708129                   | 7218642                 | 7232210                | 6729603           | 4966260                    | 3572365                  | 4846508                 |
| $\alpha$ -tubulin                              | 1961259                                      | 2071485                   | 1889649                 | 1740564                | 1730898           | 1963104                    | 1591766                  | 1856926                 |
| Intensity ratio<br>(MCL1/ $\alpha$ -tubulin)   | 0.34                                         | 0.78                      | 1.08                    | 0.87                   | 0.33              | 1.13                       | 1.24                     | 1.08                    |
| Intensity ratio<br>(BCL-XL/ $\alpha$ -tubulin) | 4.07                                         | 2.76                      | 3.82                    | 4.16                   | 3.89              | 2.53                       | 2.24                     | 2.61                    |

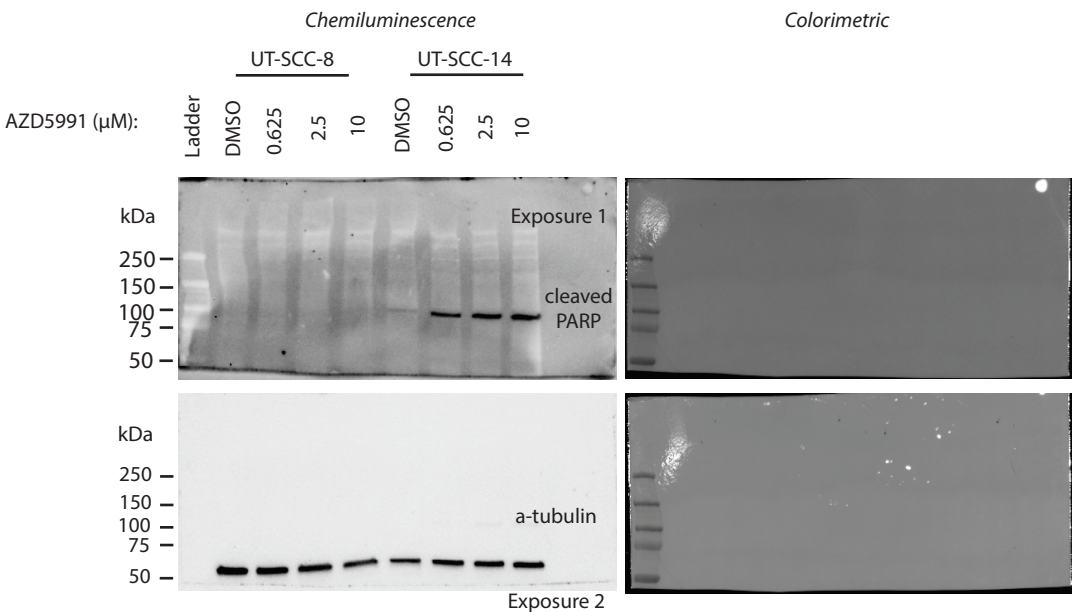

| AZD-5991-treated                             | Intensity of each band (background adjusted) |                           |                         |                        |                   |                            |                          |                         |
|----------------------------------------------|----------------------------------------------|---------------------------|-------------------------|------------------------|-------------------|----------------------------|--------------------------|-------------------------|
|                                              | UT-SCC-8<br>DMSO                             | UT-SCC-8<br>0.625 $\mu$ M | UT-SCC-8<br>2.5 $\mu$ M | UT-SCC-8<br>10 $\mu$ M | UT-SCC-14<br>DMSO | UT-SCC-14<br>0.625 $\mu$ M | UT-SCC-14<br>2.5 $\mu$ M | UT-SCC-14<br>10 $\mu$ M |
| Cleaved-PARP                                 | -48534                                       | -63401                    | -94361                  | 10784                  | 52453             | 515492                     | 902968                   | 1112333                 |
| $\alpha$ -tubulin                            | 2441657                                      | 2155564                   | 1765976                 | 1409903                | 1320234           | 1602544                    | 1554180                  | 1673707                 |
| Intensity ratio<br>(PARP/ $\alpha$ -tubulin) | 0.00                                         | 0.00                      | 0.00                    | 0.01                   | 0.04              | 0.32                       | 0.58                     | 0.66                    |

**Figure S7** Uncropped blots of Figure S2A. Immunoblot analysis shows ANO1 and  $\alpha$ -tubulin protein levels following lentiviral transductions. Two different shRNA constructs targeting ANO1, as well as two technical replicates were tested. shScramble indicates control lentivirus constructs. Cell lines used were UT-SCC-8 and UT-SCC-14. Densitometry readings and normalized values are presented in the tables under the respective whole blots.

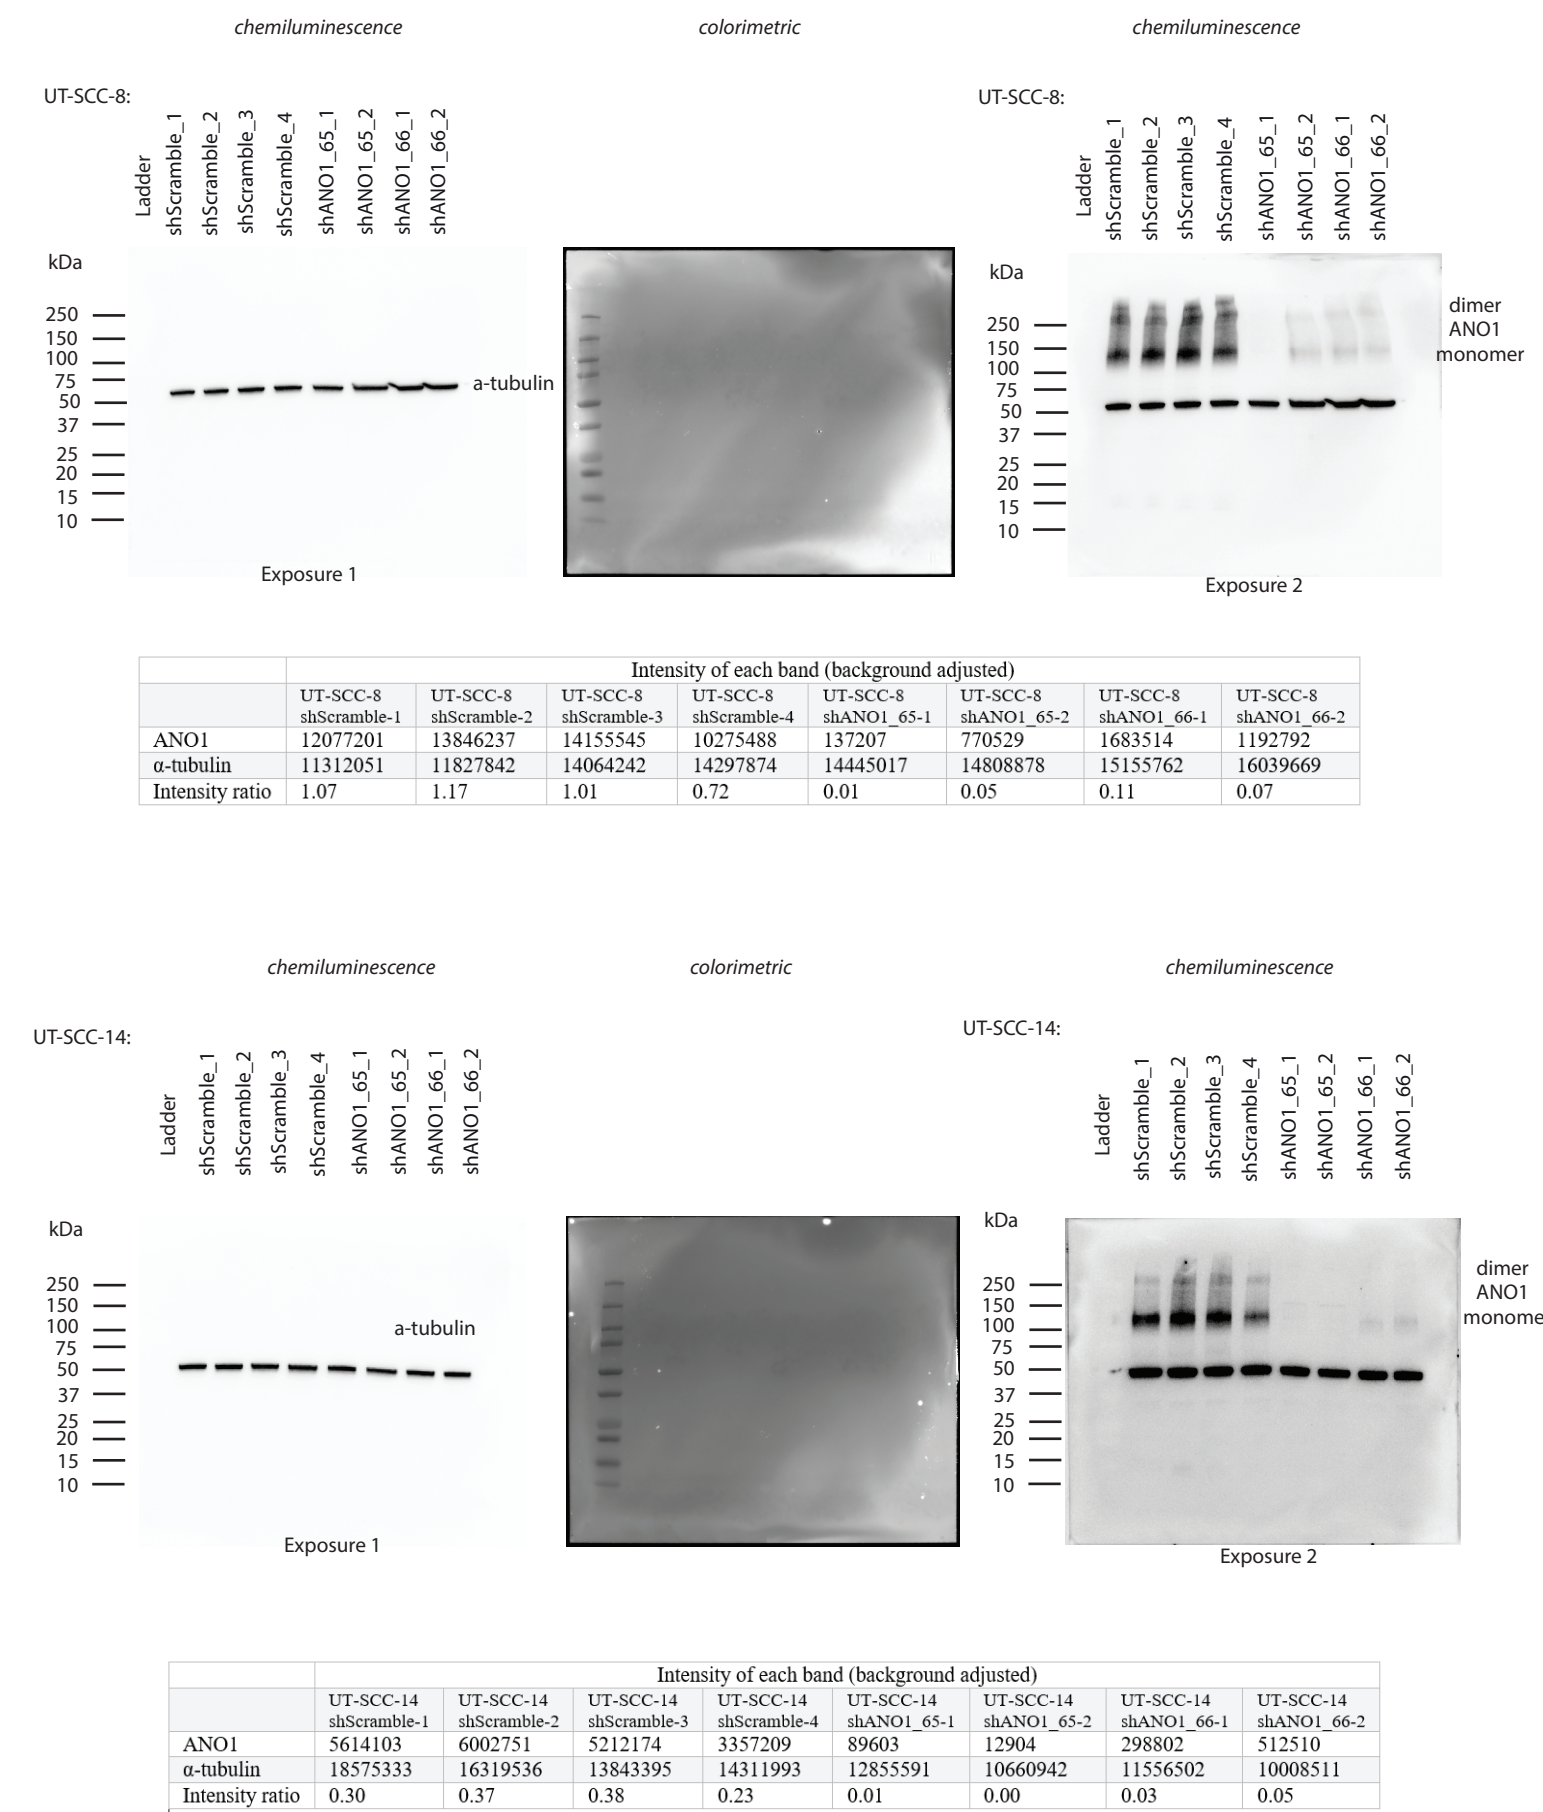



**Figure S7** Uncropped blots of Figure S3A. Immunoblot analysis of changes in proteins ANO1, COXIV and a-tubulin in cytoplasmic and mitochondrial fractions of the cell line UT-SCC-8. Densitometry readings and intensity ratios (normalized values) are presented in the table under the whole blots.

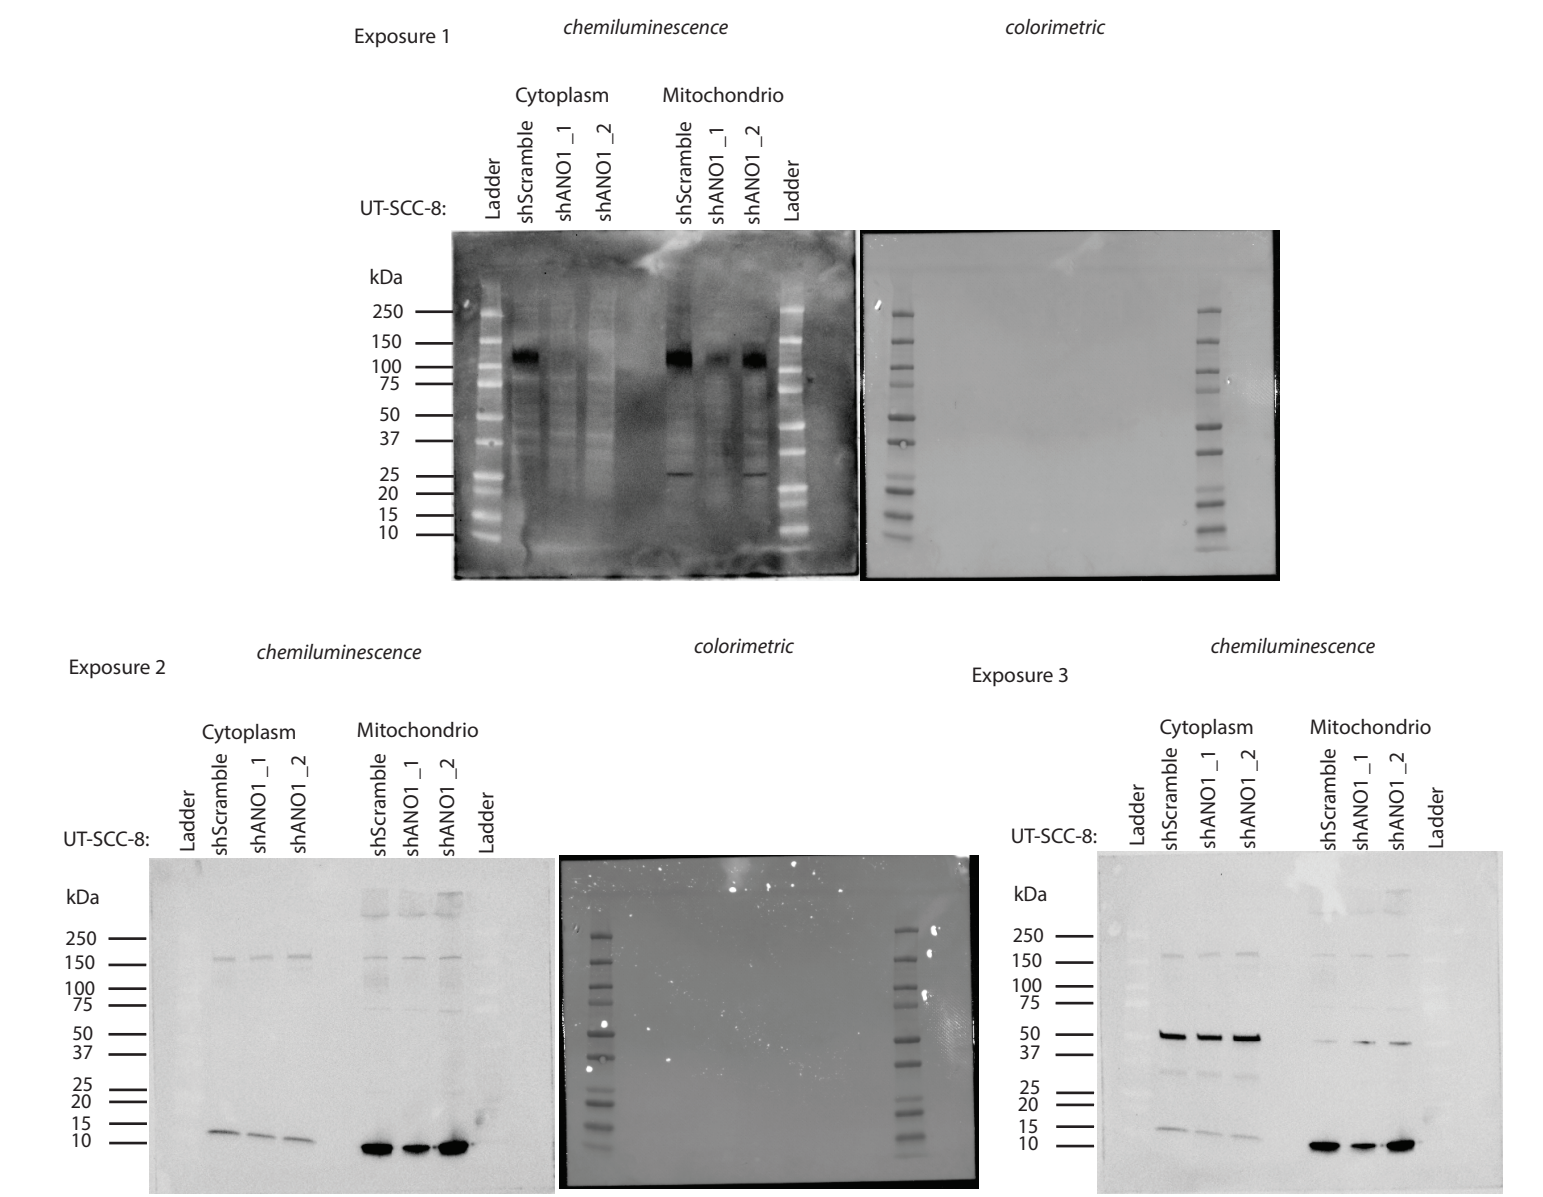

|                                   | Intensity of each band (background adjusted) |                                     |                                     |                                        |                                      |                                      |
|-----------------------------------|----------------------------------------------|-------------------------------------|-------------------------------------|----------------------------------------|--------------------------------------|--------------------------------------|
|                                   | UT-SCC-8<br>shScramble<br>cytoplasmic        | UT-SCC-8<br>shANO1_1<br>cytoplasmic | UT-SCC-8<br>shANO1_2<br>cytoplasmic | UT-SCC-8<br>shScramble<br>mitochondrio | UT-SCC-8<br>shANO1_1<br>mitochondrio | UT-SCC-8<br>shANO1_2<br>mitochondrio |
| ANO1                              | 1708467                                      | 142562                              | 10719                               | 2423751                                | 789525                               | 1635683                              |
| a-tubulin                         | 848404                                       | 684063                              | 1013428                             | 59593                                  | 136652                               | 151321                               |
| COXIV                             | 251119                                       | 156889                              | 205156                              | 2307407                                | 1123599                              | 2702501                              |
| Intensity ratio<br>(to a-tubulin) | 2.01                                         | 0.21                                | 0.01                                | 40.67                                  | 5.78                                 | 10.81                                |
| Intensity ratio<br>(to COXIV)     | 6.80                                         | 0.91                                | 0.05                                | 1.05                                   | 0.70                                 | 0.61                                 |

**Figure S7** Uncropped blots of Figure S3B.

Immunoblot analysis of the proteins COXIV and  $\alpha$ -tubulin from co-immunoprecipitated samples with ANO1 antibody, as well as their corresponding inputs samples. Cell lines utilized were UT-SCC-8 and UT-SCC-14. COXIV antibody used was raised in mouse (Abcam).

colorimetric

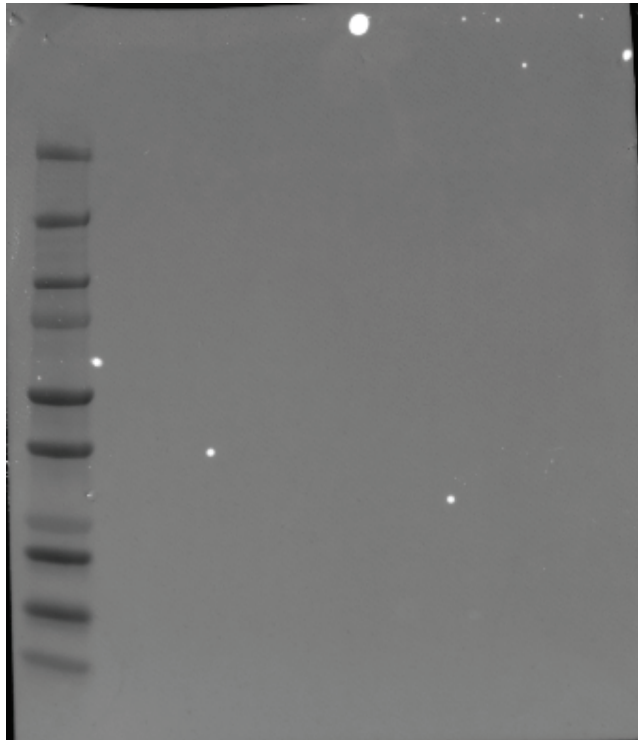

chemiluminescence

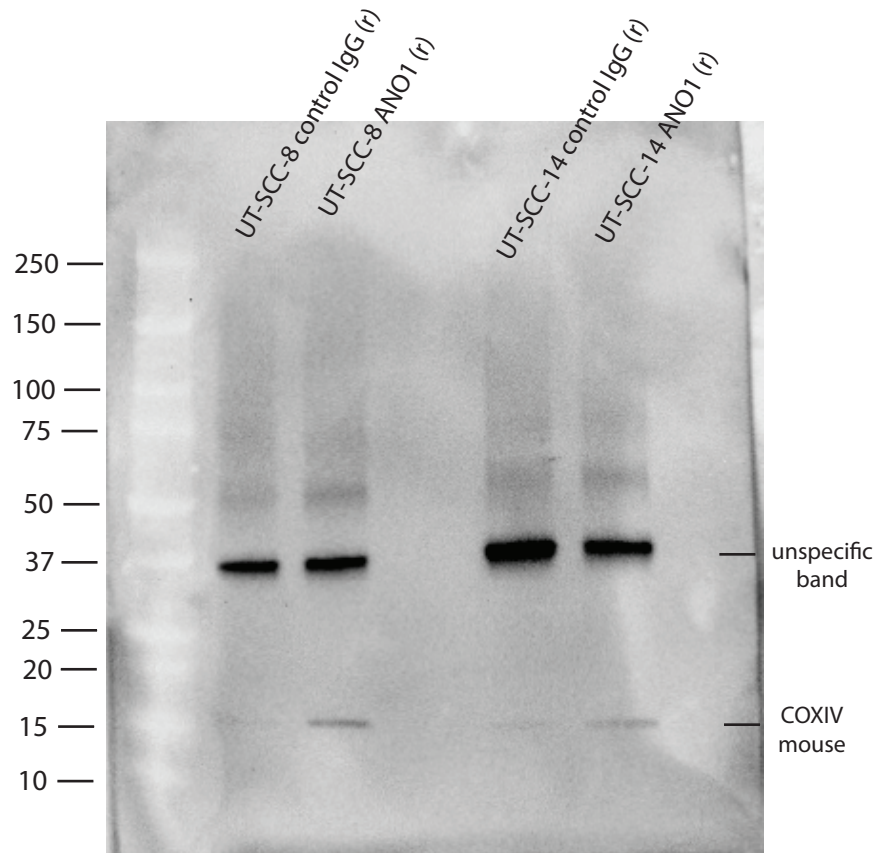

chemiluminescence

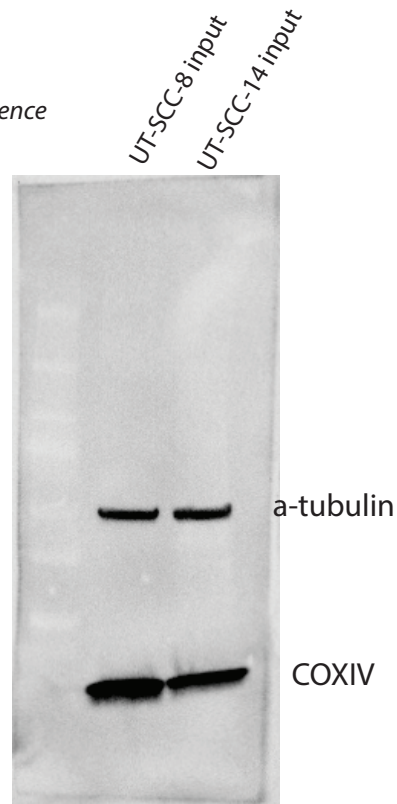

colorimetric

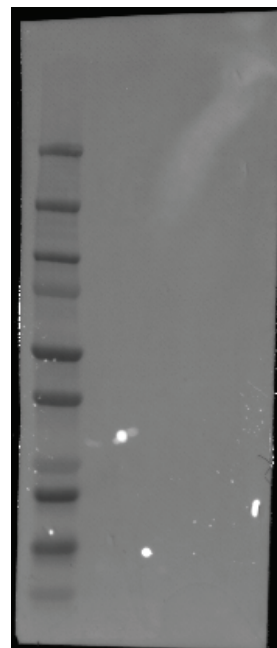

**Figure S7** Uncropped blots of Figure S3C. Immunoblot analysis of the proteins ANO1, MCL1, BCL-XL, BCL2, BIM and  $\alpha$ -tubulin from cell lysates of a panel of UTSCC cell lines. Alpha-tubulin was used as the loading control to normalize the quantities of the proteins. Densitometry readings and normalized values are presented in the tables under the respective blots.

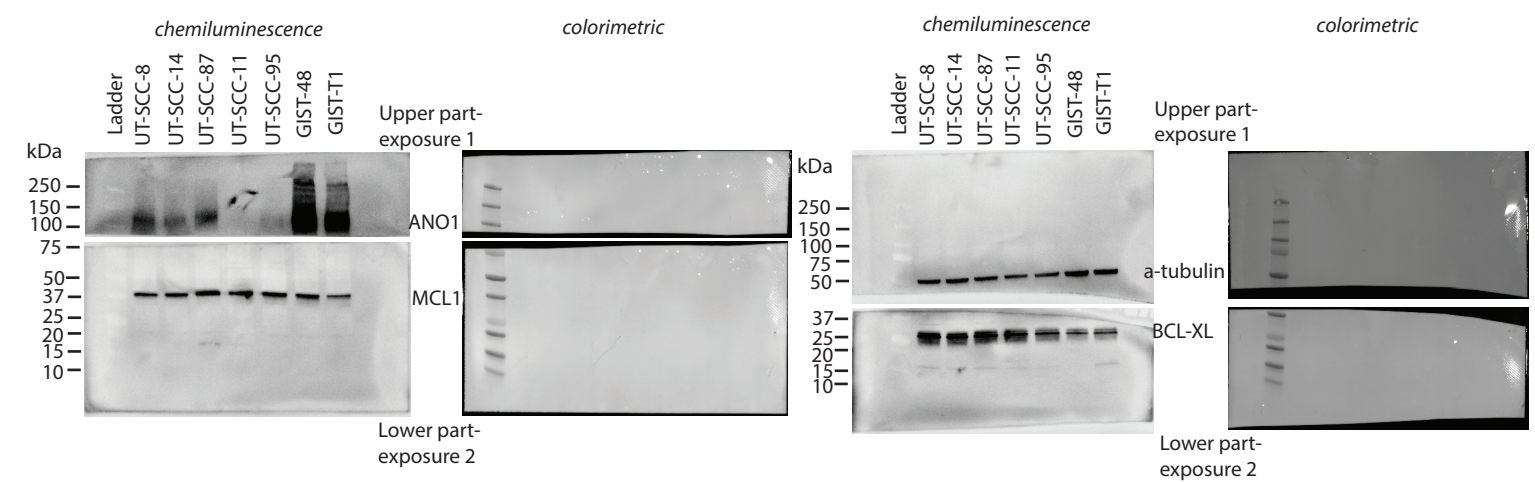

The two gels above were run simultaneously in the sds-page cassette, after which the two mini-gels were transferred in parallel using a midi-PVDF membrane.

|                                             | Intensity of each band (background adjusted) |           |           |           |           |         |         |
|---------------------------------------------|----------------------------------------------|-----------|-----------|-----------|-----------|---------|---------|
|                                             | UT-SCC-8                                     | UT-SCC-14 | UT-SCC-87 | UT-SCC-11 | UT-SCC-95 | GIST-48 | GIST-T1 |
| ANO1                                        | 1557644                                      | 1087278   | 1139776   | 370644    | 677492    | 5937297 | 4030323 |
| MCL1                                        | 1096911                                      | 1227031   | 1657176   | 1711423   | 1600784   | 1355426 | 779095  |
| BCL-XL                                      | 4124391                                      | 3602105   | 3908531   | 3812586   | 2906652   | 1824880 | 2112793 |
| $\alpha$ -tubulin                           | 1273000                                      | 1329923   | 1128754   | 840036    | 907972    | 1754374 | 2047973 |
| Intensity ratio (ANO1/ $\alpha$ -tubulin)   | 1.22                                         | 0.82      | 1.01      | 0.44      | 0.75      | 3.38    | 1.97    |
| Intensity ratio (MCL1/ $\alpha$ -tubulin)   | 0.86                                         | 0.92      | 1.47      | 2.04      | 1.76      | 0.77    | 0.38    |
| Intensity ratio (BCL-XL/ $\alpha$ -tubulin) | 3.24                                         | 2.71      | 3.46      | 4.54      | 3.20      | 1.04    | 1.03    |

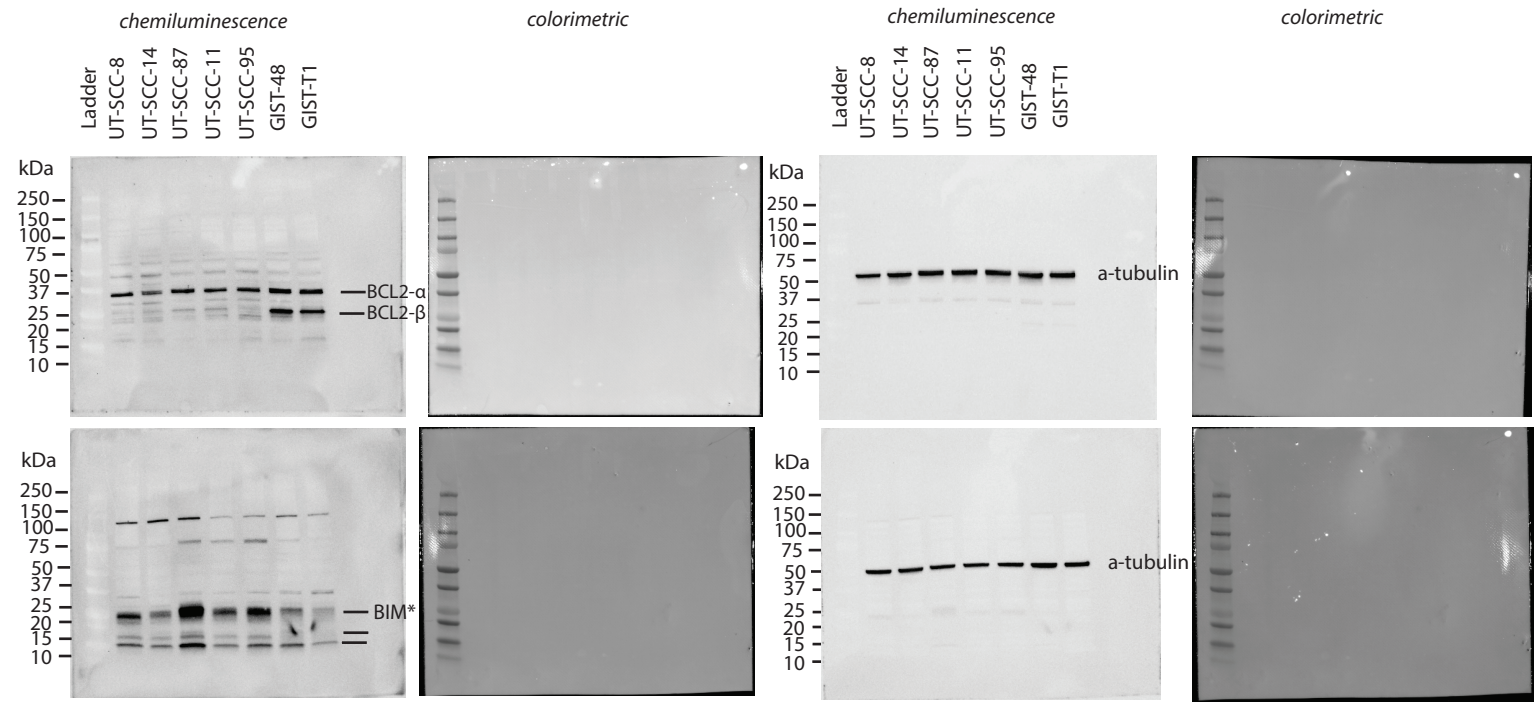

\*BIM-specific bands: 23, 16, 12 kDa. Dnsitometry was measured for the main, 23 kD band.

|                                                      | Intensity of each band (background adjusted) |           |           |           |           |         |         |
|------------------------------------------------------|----------------------------------------------|-----------|-----------|-----------|-----------|---------|---------|
|                                                      | UT-SCC-8                                     | UT-SCC-14 | UT-SCC-87 | UT-SCC-11 | UT-SCC-95 | GIST-48 | GIST-T1 |
| BCL2- $\alpha$                                       | 1005709                                      | 597373    | 1204262   | 974539    | 1113073   | 1544510 | 1455693 |
| BCL2- $\beta$                                        | 66430                                        | 80284     | 183876    | 158980    | 69084     | 1530632 | 1110605 |
| $\alpha$ -tubulin                                    | 1562656                                      | 1807257   | 1711540   | 1610574   | 1709107   | 1913249 | 2154470 |
| Intensity ratio (BCL2- $\alpha$ / $\alpha$ -tubulin) | 0.64                                         | 0.33      | 0.70      | 0.61      | 0.65      | 0.81    | 0.68    |
| Intensity ratio (BCL2- $\beta$ / $\alpha$ -tubulin)  | 0.04                                         | 0.04      | 0.11      | 0.10      | 0.04      | 0.80    | 0.52    |
| BIM                                                  | 1556109                                      | 791182    | 4124364   | 1519685   | 2188691   | 871609  | 360657  |
| $\alpha$ -tubulin                                    | 1389433                                      | 1154068   | 1109790   | 1079964   | 1333818   | 1929931 | 1860979 |
| Intensity ratio (BIM/ $\alpha$ -tubulin)             | 1.12                                         | 0.69      | 3.72      | 1.41      | 1.64      | 0.45    | 0.19    |



**Figure S7** Uncropped blots of Figure S4B. Immunoblot analysis of the proteins ANO1 and a-tubulin from cell lysates of UT-SCC-8 and UT-SCC-14 treated with a range of concentrations of Ani9 inhibitor. Alpha-tubulin was used as the control to normalize the quantities of the proteins. Densitometry readings and normalized values are presented in the tables under the respective blots.

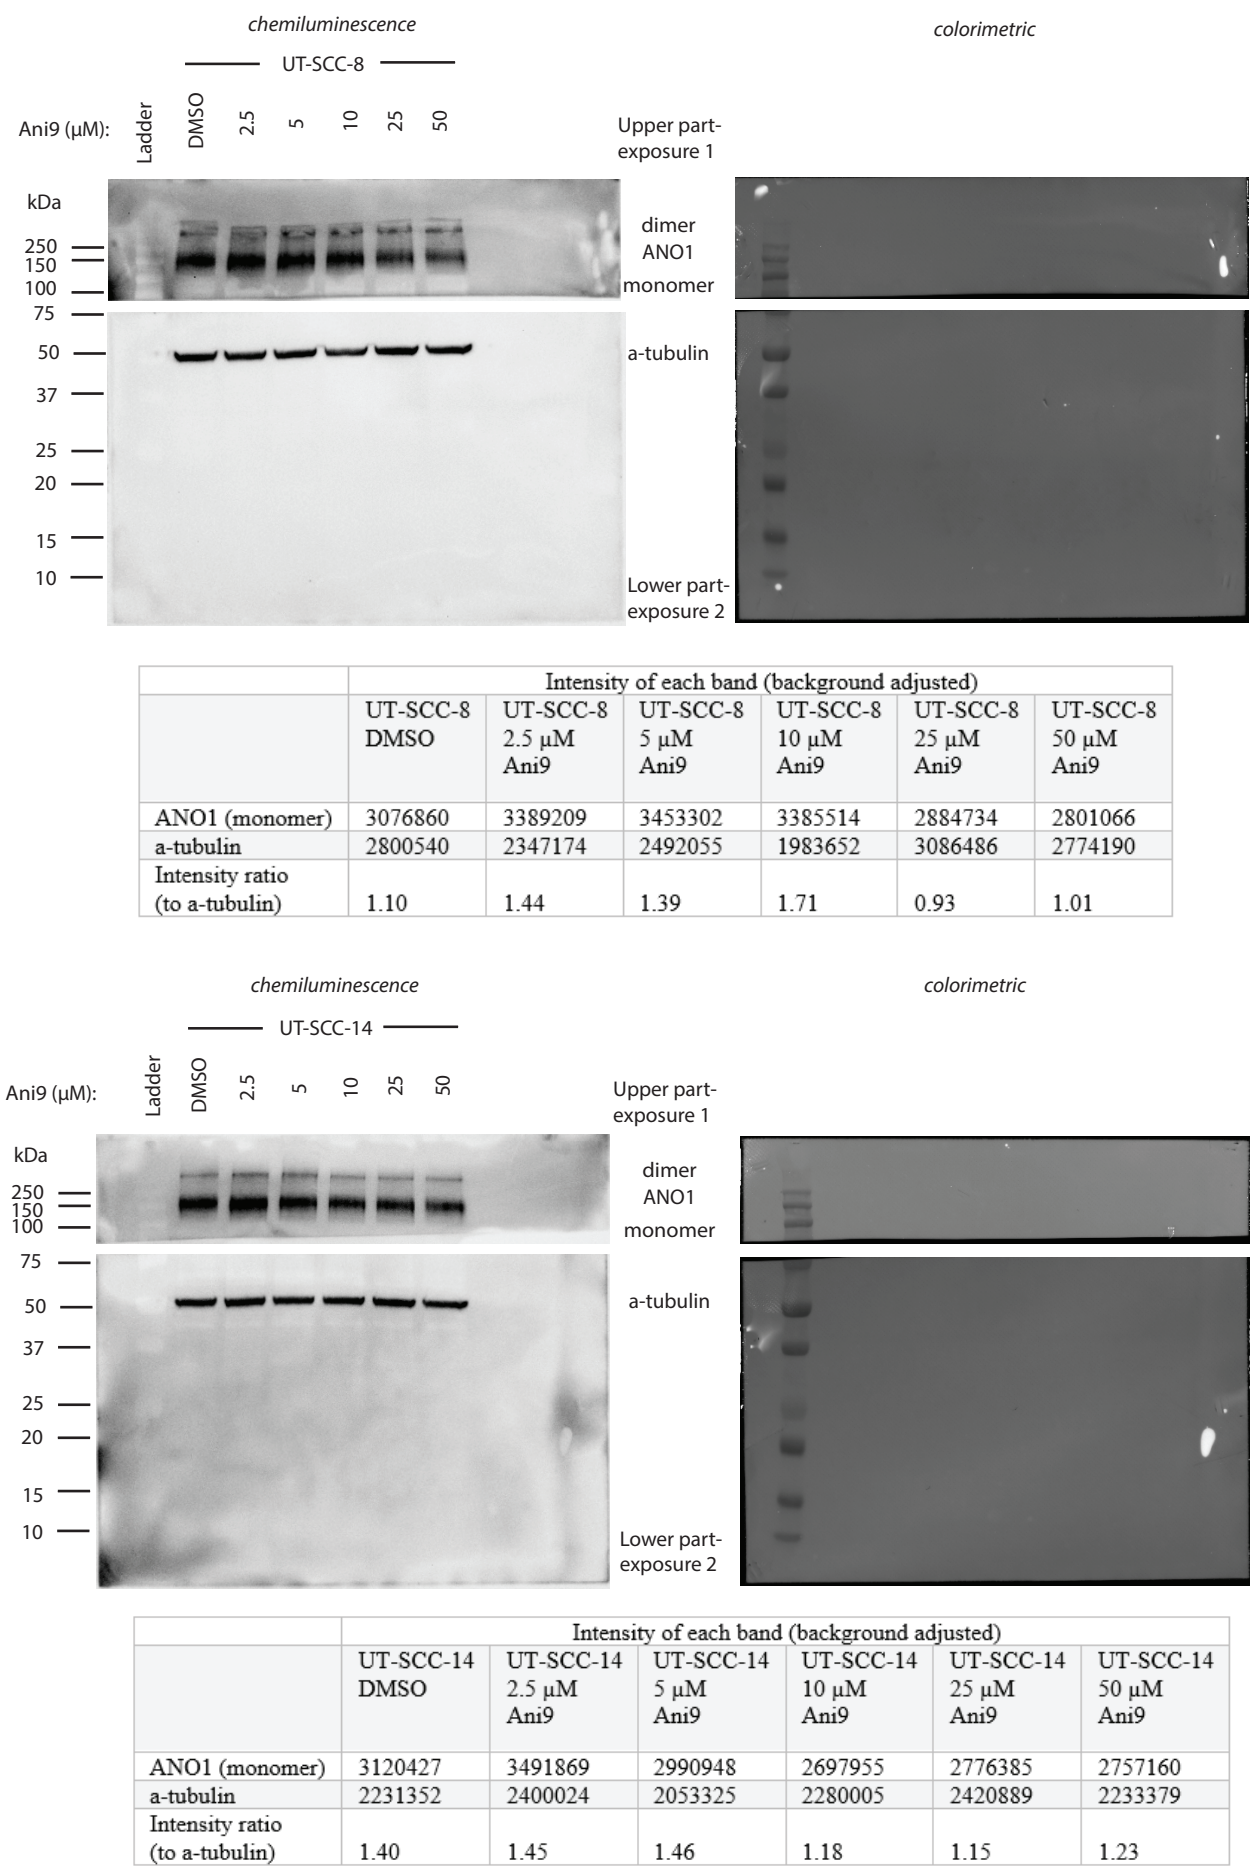

**Figure S7** Uncropped blots of Figure S6B.  
 Immunoblot analysis of the proteins ANO1 and  $\alpha$ -tubulin of cell lysates from GIST-48 and GIST-T1 treated with a range of concentrations of Ani9-5f inhibitor. Alpha-tubulin was used as the control to normalize the quantities of the proteins. Densitometry readings and normalized values are presented in the tables under the respective blots.

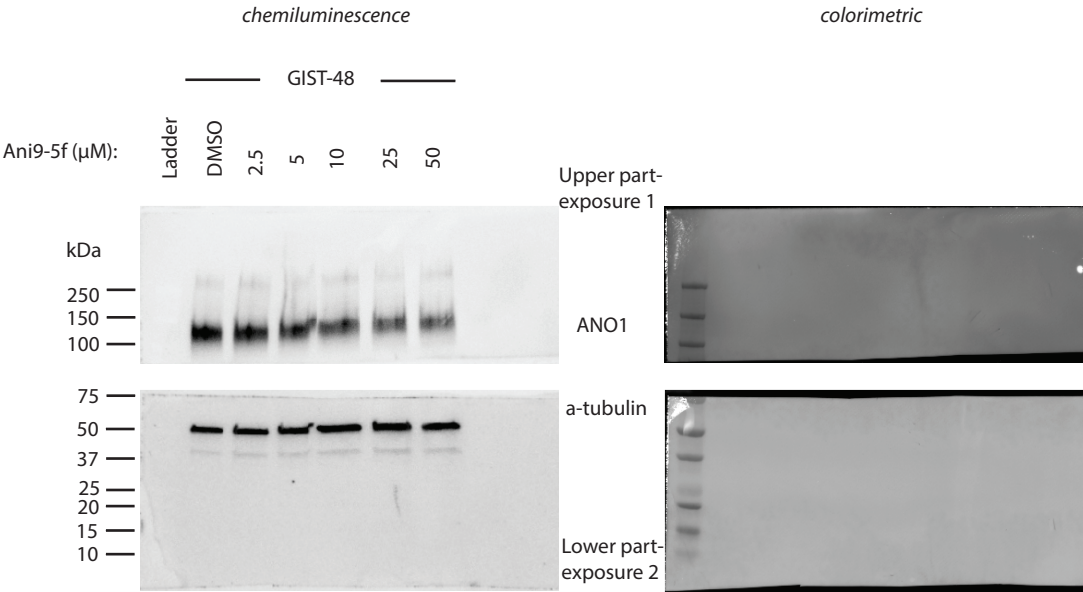

|                                        | Intensity of each band (background adjusted) |                             |                           |                            |                            |                            |
|----------------------------------------|----------------------------------------------|-----------------------------|---------------------------|----------------------------|----------------------------|----------------------------|
|                                        | GIST-48 DMSO                                 | GIST-48 2.5 $\mu$ M Ani9-5f | GIST-48 5 $\mu$ M Ani9-5f | GIST-48 10 $\mu$ M Ani9-5f | GIST-48 25 $\mu$ M Ani9-5f | GIST-48 50 $\mu$ M Ani9-5f |
| ANO1 (monomer)                         | 4103574                                      | 4148841                     | 3423658                   | 2861404                    | 2992919                    | 2876292                    |
| $\alpha$ -tubulin                      | 1403925                                      | 1682958                     | 1553548                   | 2096217                    | 2379447                    | 1887867                    |
| Intensity ratio (to $\alpha$ -tubulin) | 2.92                                         | 2.47                        | 2.20                      | 1.37                       | 1.26                       | 1.52                       |

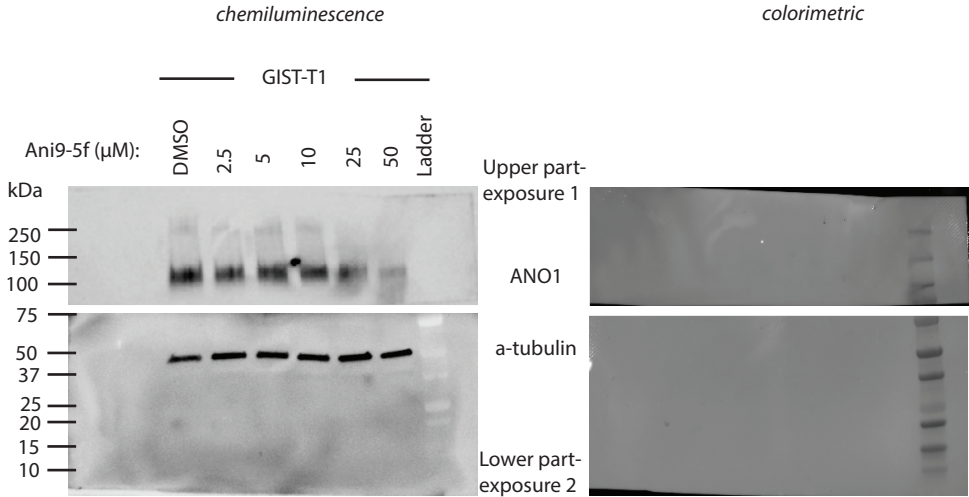

|                                        | Intensity of each band (background adjusted) |                             |                           |                            |                            |                            |
|----------------------------------------|----------------------------------------------|-----------------------------|---------------------------|----------------------------|----------------------------|----------------------------|
|                                        | GIST-T1 DMSO                                 | GIST-T1 2.5 $\mu$ M Ani9-5f | GIST-T1 5 $\mu$ M Ani9-5f | GIST-T1 10 $\mu$ M Ani9-5f | GIST-T1 25 $\mu$ M Ani9-5f | GIST-T1 50 $\mu$ M Ani9-5f |
| ANO1 (monomer)                         | 1409509                                      | 1089275                     | 866654                    | 343499                     | 729478                     | 384773                     |
| $\alpha$ -tubulin                      | 1095759                                      | 1701096                     | 1548198                   | 1382456                    | 1756769                    | 1595450                    |
| Intensity ratio (to $\alpha$ -tubulin) | 1.29                                         | 0.64                        | 0.56                      | 0.25                       | 0.42                       | 0.24                       |



Figure S8

Run 1-UT-SCC-8

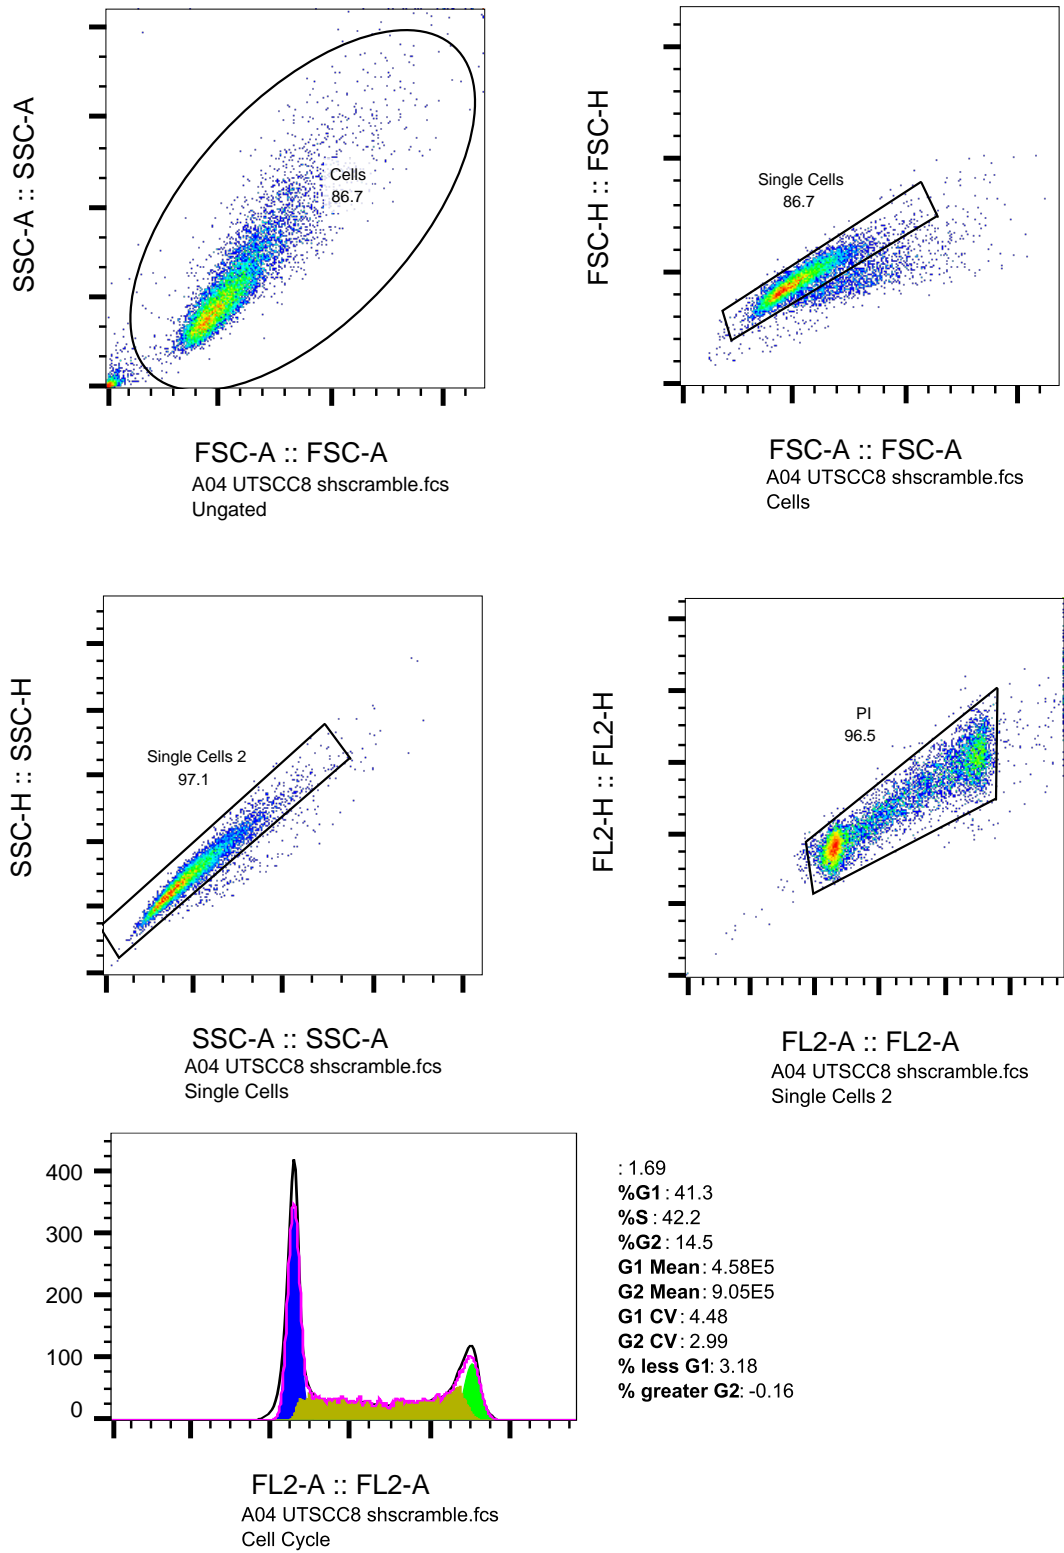

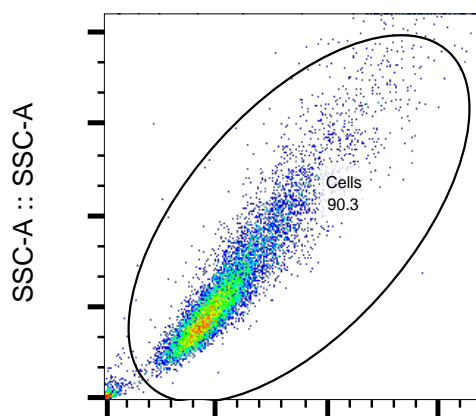

FSC-A :: FSC-A  
A05 UTSCC8 shANO1 65.fcs  
Ungated

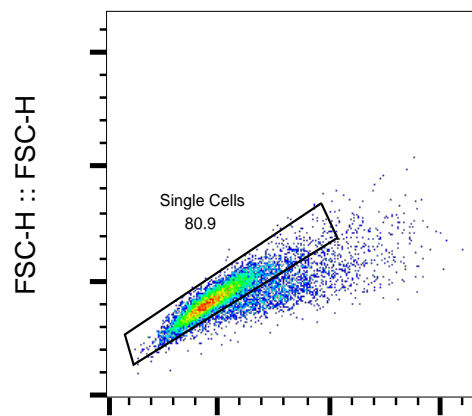

FSC-A :: FSC-A  
A05 UTSCC8 shANO1 65.fcs  
Cells

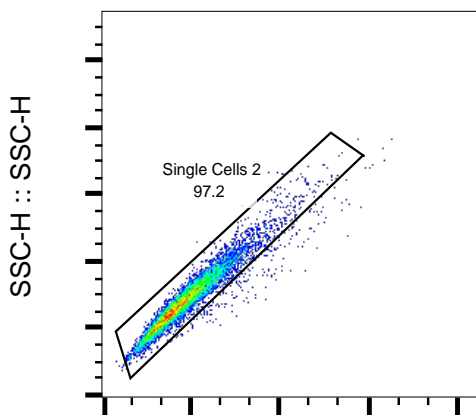

SSC-A :: SSC-A  
A05 UTSCC8 shANO1 65.fcs  
Single Cells

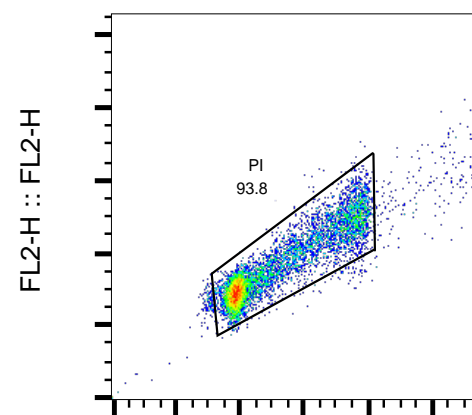

FL2-A :: FL2-A  
A05 UTSCC8 shANO1 65.fcs  
Single Cells 2

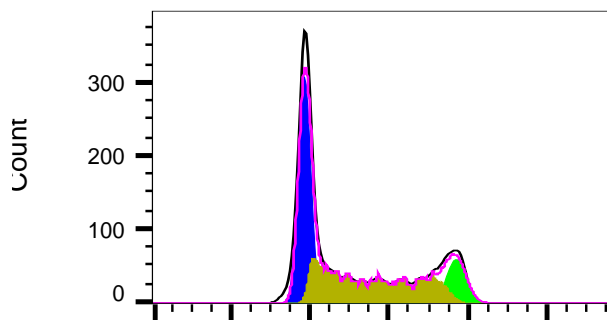

FL2-A :: FL2-A  
A05 UTSCC8 shANO1 65.fcs  
Cell Cycle

: 1.02  
%G1: 43.8  
%S: 41.6  
%G2: 13.4  
G1 Mean: 386630  
G2 Mean: 7.71E5  
G1 CV: 5.71  
G2 CV: 4.56  
% less G1: 2.19  
% greater G2: -0.87

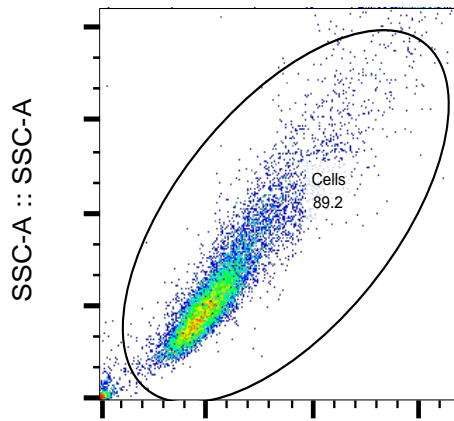

FSC-A :: FSC-A  
A06 UTSCC8 shANO1 66.fcs  
Ungated

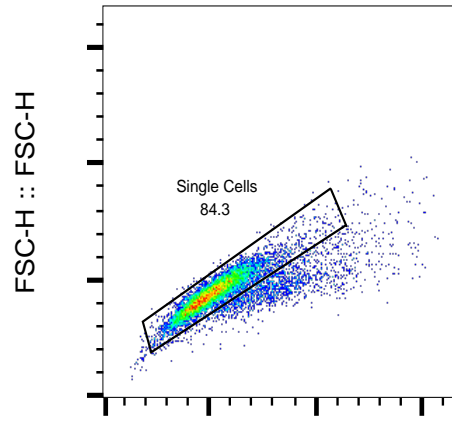

FSC-A :: FSC-A  
A06 UTSCC8 shANO1 66.fcs  
Cells

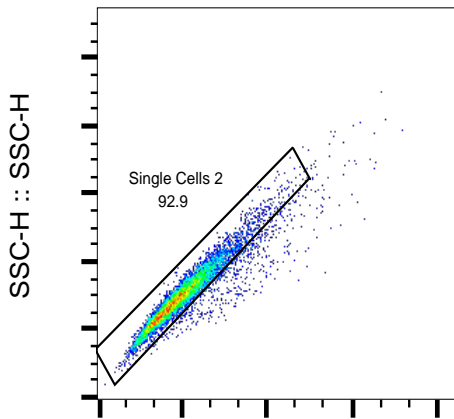

SSC-A :: SSC-A  
A06 UTSCC8 shANO1 66.fcs  
Single Cells

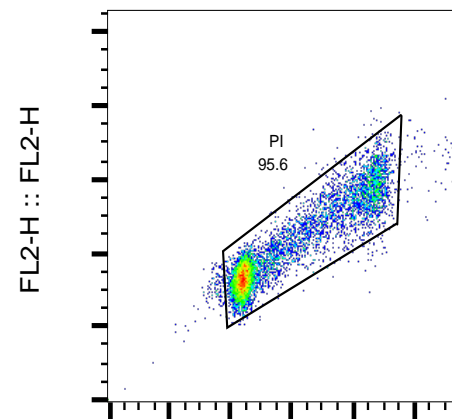

FL2-A :: FL2-A  
A06 UTSCC8 shANO1 66.fcs  
Single Cells 2

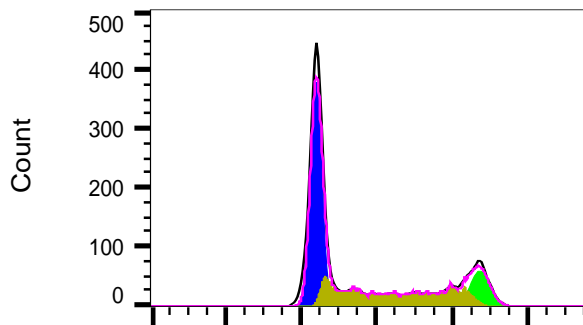

FL2-A :: FL2-A  
A06 UTSCC8 shANO1 66.fcs  
Cell Cycle

: 1.04  
%G1: 51.0  
%S: 33.9  
%G2: 13.3  
G1 Mean: 4.40E5  
G2 Mean: 8.74E5  
G1 CV: 4.89  
G2 CV: 4.07  
% less G1: 1.87  
% greater G2: -0.13

# Run 2- UT-SCC-8

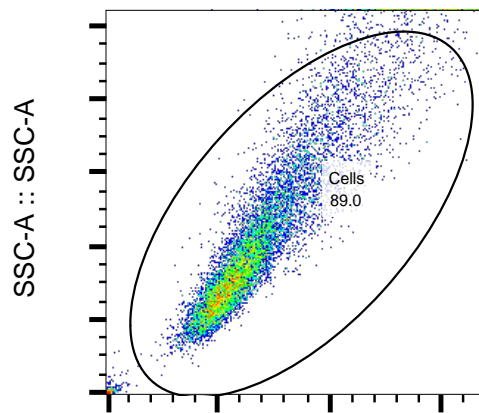

FSC-A :: FSC-A  
A02 8 shscramble.fcs  
Ungated

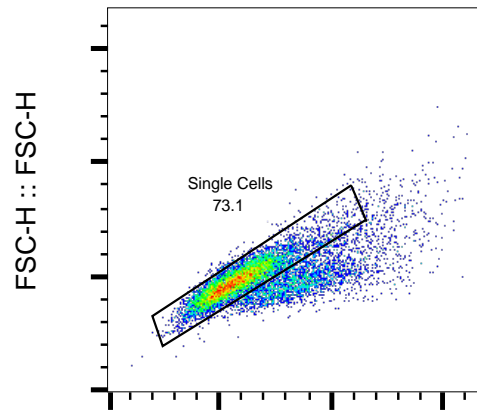

FSC-A :: FSC-A  
A02 8 shscramble.fcs  
Cells

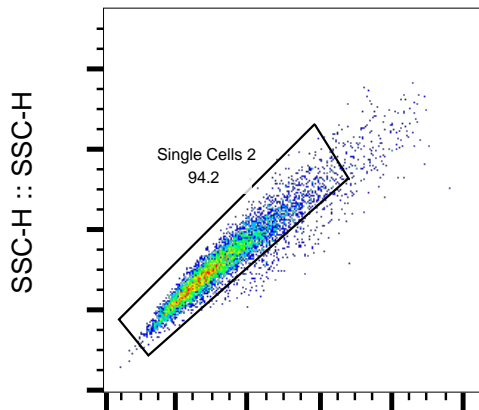

SSC-A :: SSC-A  
A02 8 shscramble.fcs  
Single Cells

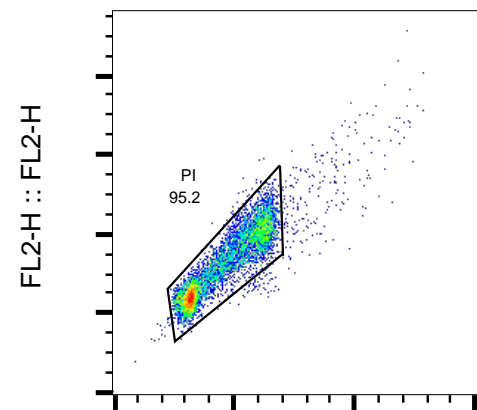

FL2-A :: FL2-A  
A02 8 shscramble.fcs  
Single Cells 2

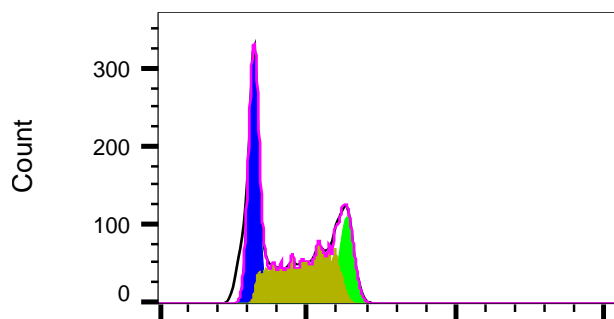

FL2-A :: FL2-A  
A02 8 shscramble.fcs  
Cell Cycle

: 2.48  
%G1: 35.9  
%S: 43.0  
%G2: 17.8  
G1 Mean: 321850  
G2 Mean: 6.36E5  
G1 CV: 7.42  
G2 CV: 5.33  
% less G1: 4.76  
% greater G2: -0.16

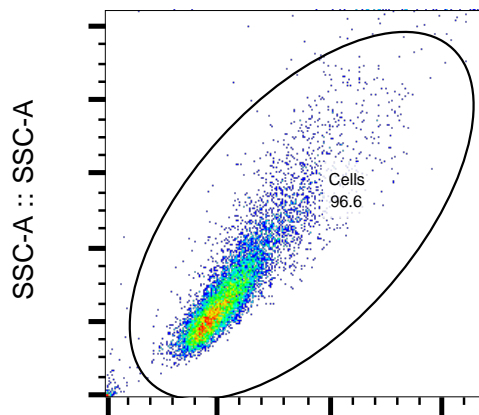

FSC-A :: FSC-A  
A01 8 KD65.fcs  
Ungated

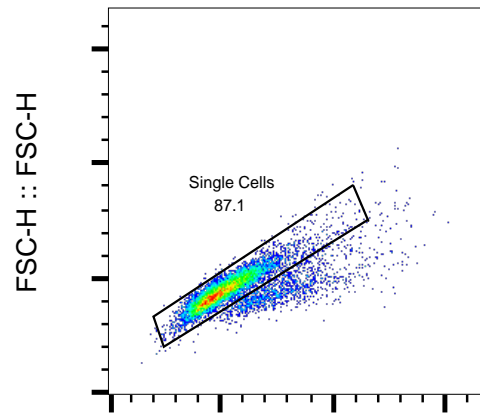

FSC-A :: FSC-A  
A01 8 KD65.fcs  
Cells

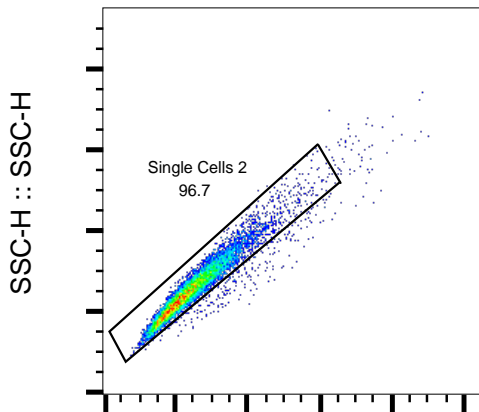

SSC-A :: SSC-A  
A01 8 KD65.fcs  
Single Cells

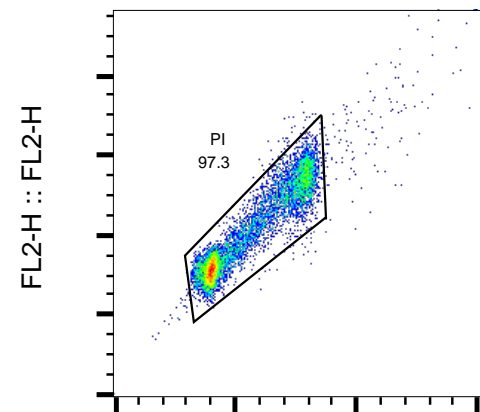

FL2-A :: FL2-A  
A01 8 KD65.fcs  
Single Cells 2

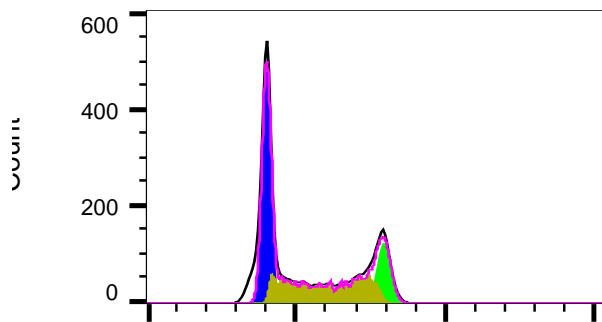

FL2-A :: FL2-A  
A01 8 KD65.fcs  
Cell Cycle

: 2.84  
%G1: 41.6  
%S: 37.4  
%G2: 15.9  
G1 Mean: 4.03E5  
G2 Mean: 7.95E5  
G1 CV: 5.15  
G2 CV: 3.91  
% less G1: 5.49  
% greater G2: 0.21

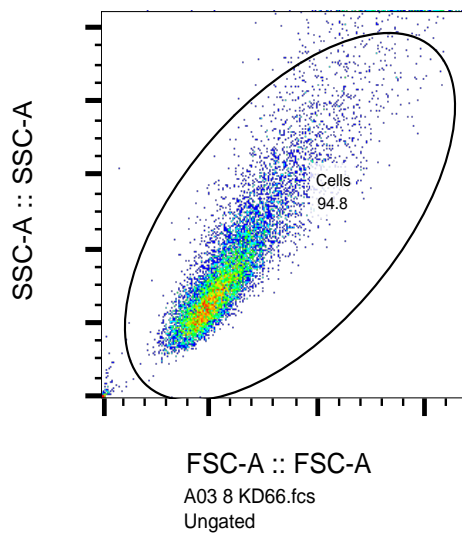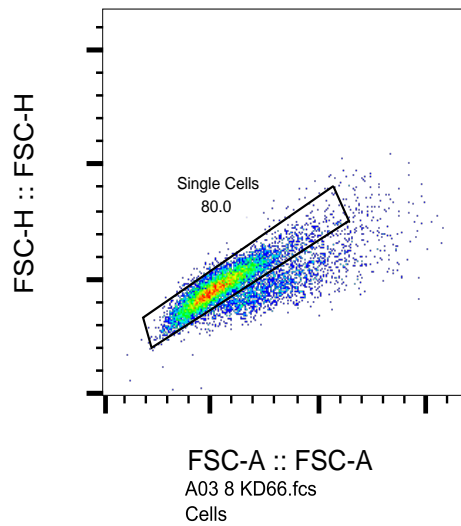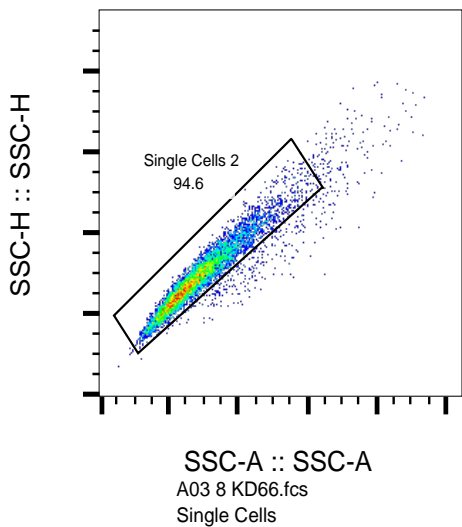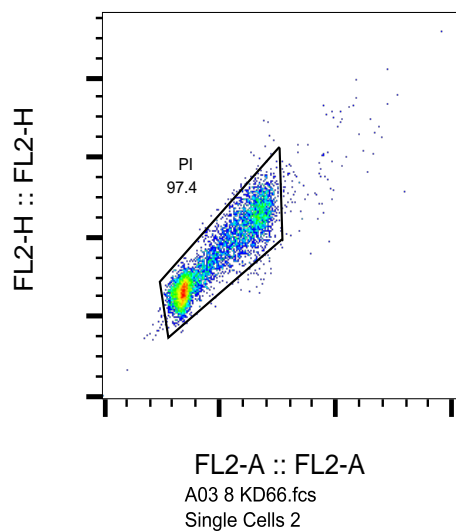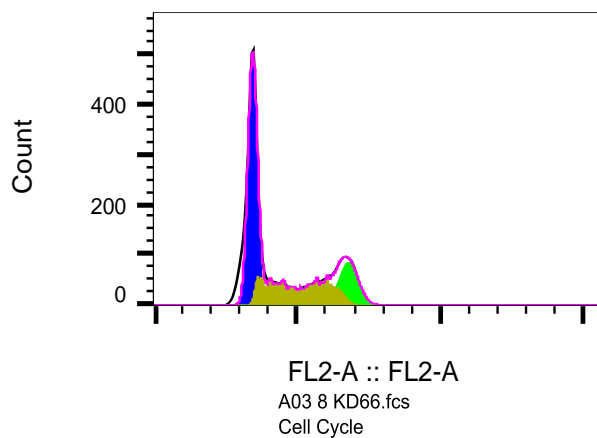

: 2.90  
 %G1: 47.4  
 %S: 32.1  
 %G2: 17.1  
 G1 Mean: 346892  
 G2 Mean: 6.81E5  
 G1 CV: 6.42  
 G2 CV: 6.87  
 % less G1: 5.11  
 % greater G2: -0.52

Run 1- UT-SCC-14

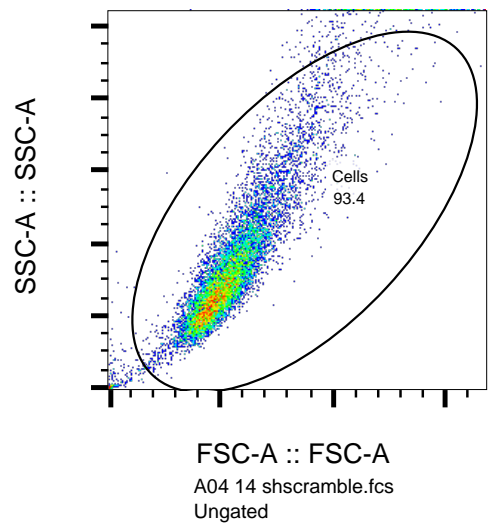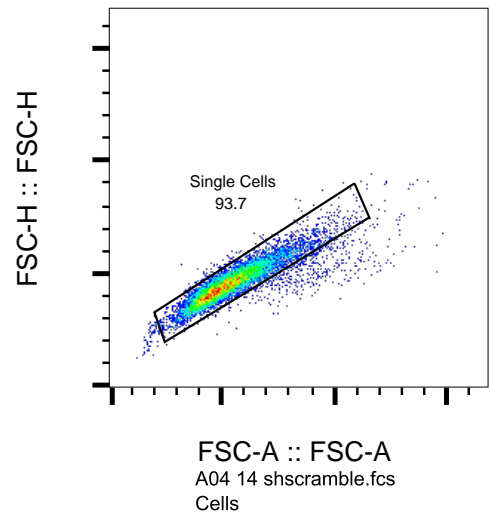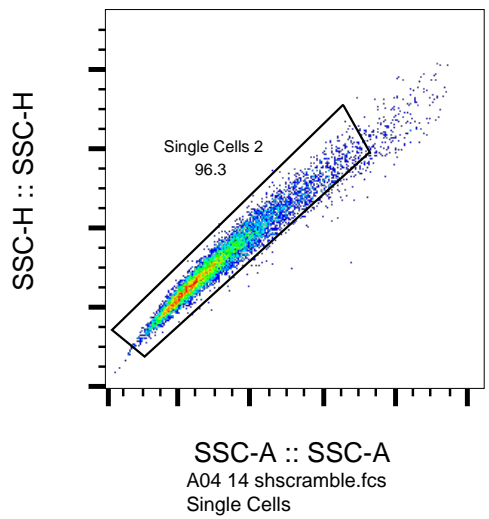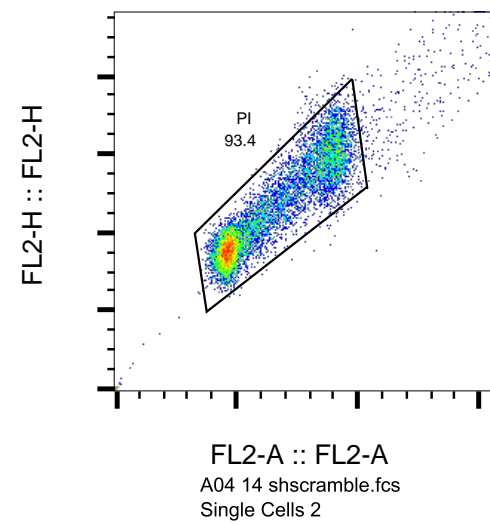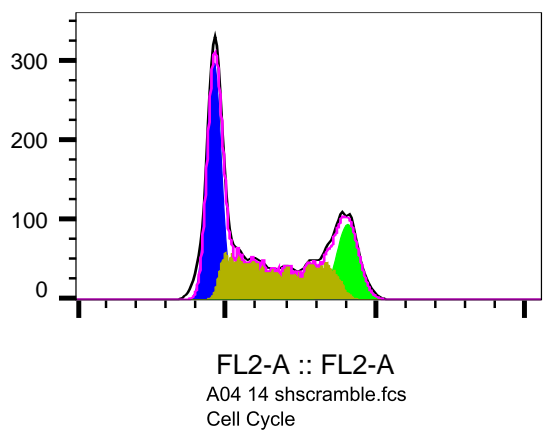

: 1.16  
%G1: 38.6  
%S: 40.4  
%G2: 18.8  
G1 Mean: 4.62E5  
G2 Mean: 9.08E5  
G1 CV: 7.27  
G2 CV: 5.71  
% less G1: 1.71  
% greater G2: 0.41

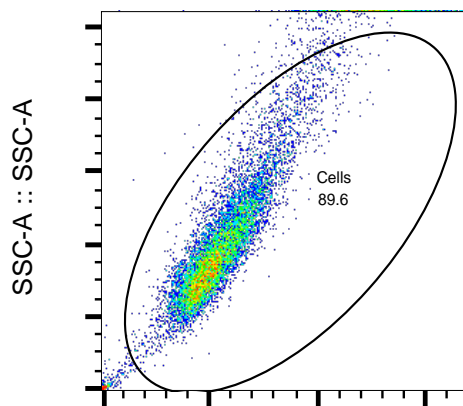

FSC-A :: FSC-A  
A05 14 KD65.fcs  
Ungated

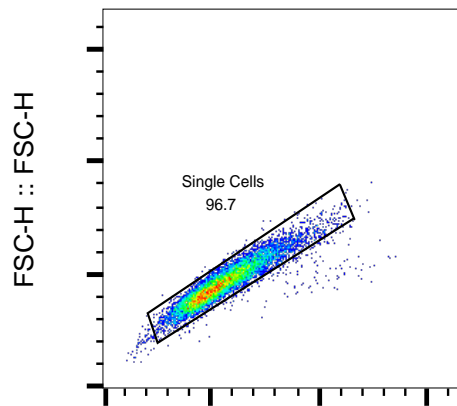

FSC-A :: FSC-A  
A05 14 KD65.fcs  
Cells

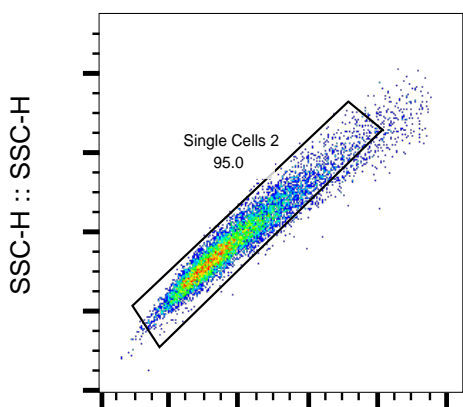

SSC-A :: SSC-A  
A05 14 KD65.fcs  
Single Cells

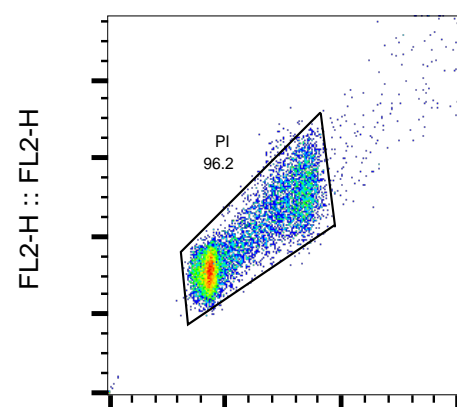

FL2-A :: FL2-A  
A05 14 KD65.fcs  
Single Cells 2

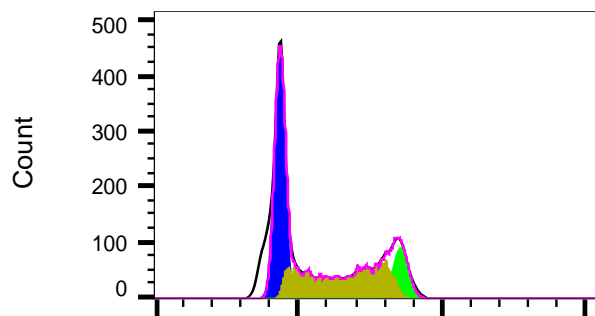

FL2-A :: FL2-A  
A05 14 KD65.fcs  
Cell Cycle

: 4.12  
%G1: 41.5  
%S: 38.9  
%G2: 12.3  
G1 Mean: 4.37E5  
G2 Mean: 8.57E5  
G1 CV: 6.02  
G2 CV: 4.38  
% less G1: 7.35  
% greater G2: 0.58



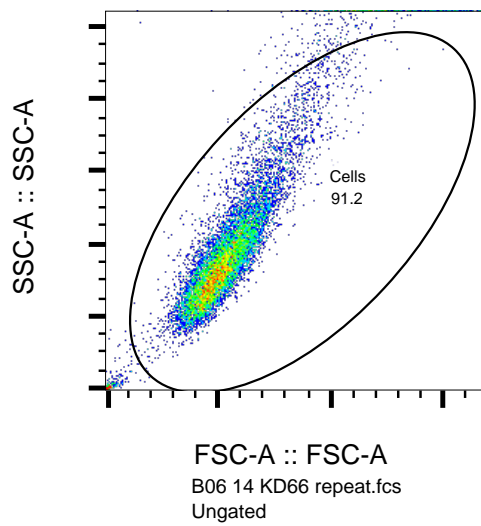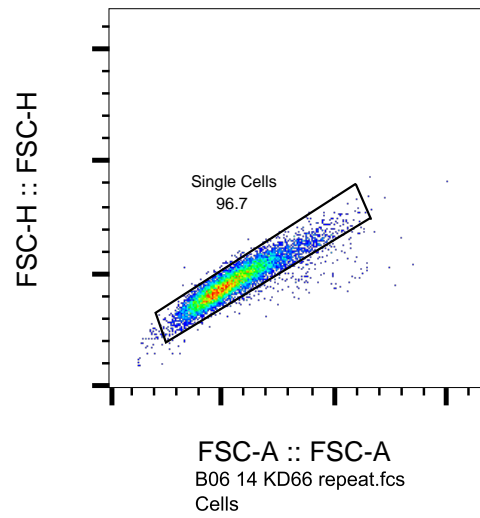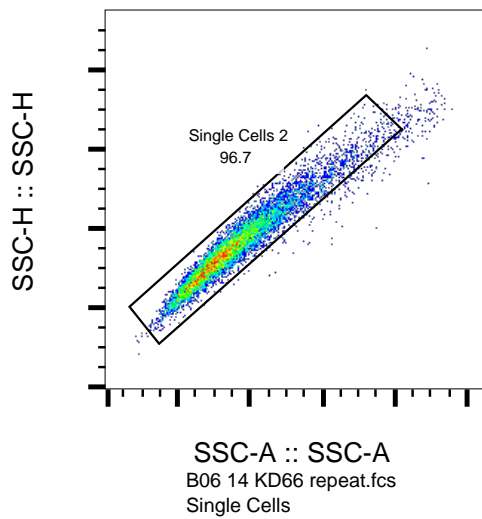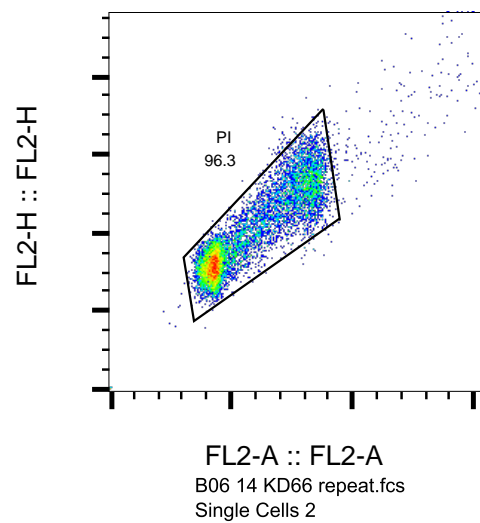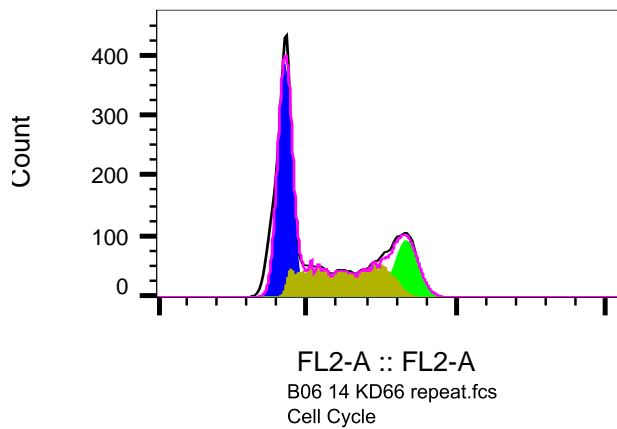

: 3.37  
 %G1: 46.3  
 %S: 34.5  
 %G2: 18.2  
 G1 Mean: 4.28E5  
 G2 Mean: 8.34E5  
 G1 CV: 7.76  
 G2 CV: 6.45  
 % less G1: 3.63  
 % greater G2: -0.74

## Run 2- UT-SCC-14

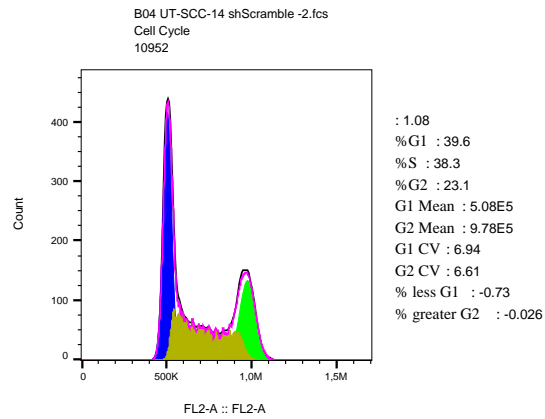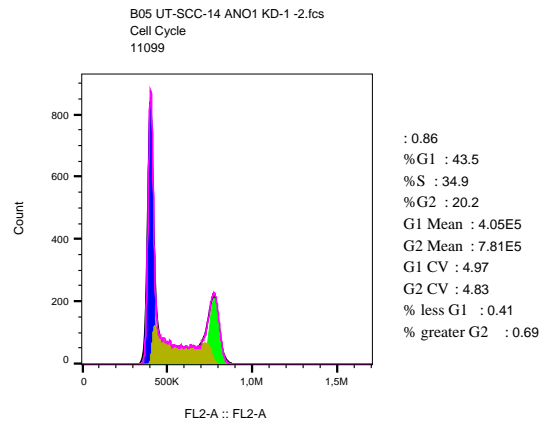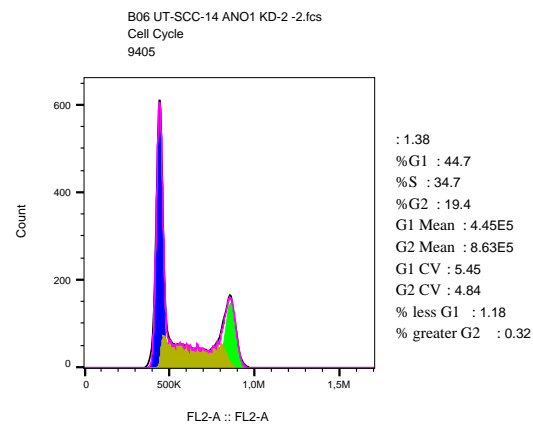

# Run 3- UT-SCC-8

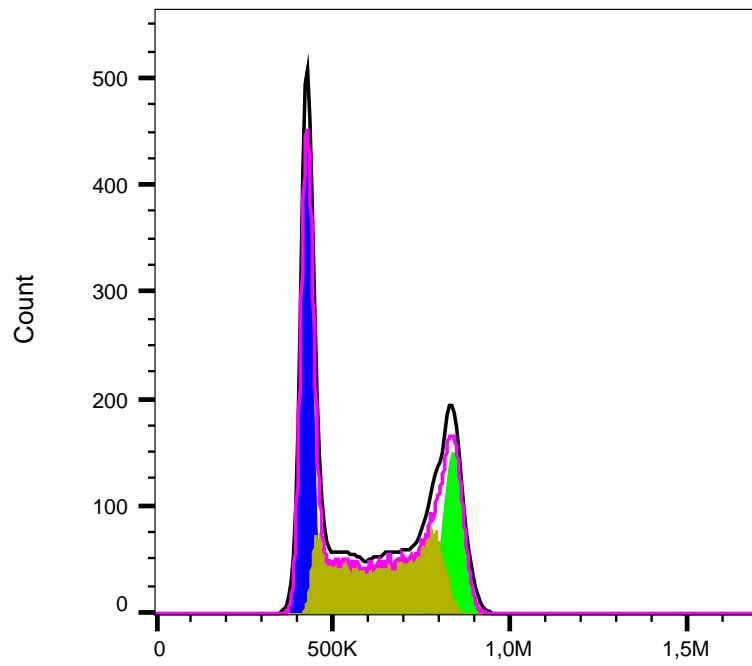

: 0,92  
%G1 : 35,0  
%S : 43,0  
%G2 : 20,3  
G1 Mean : 4,29E5  
G2 Mean : 8,43E5  
G1 CV : 5,30  
G2 CV : 4,55  
% less G1 : 0,13  
% greater G2 : 0,91

FL2-A :: FL2-A

A01 UT-SCC-8 shScramble.fcs

Cell Cycle

9499

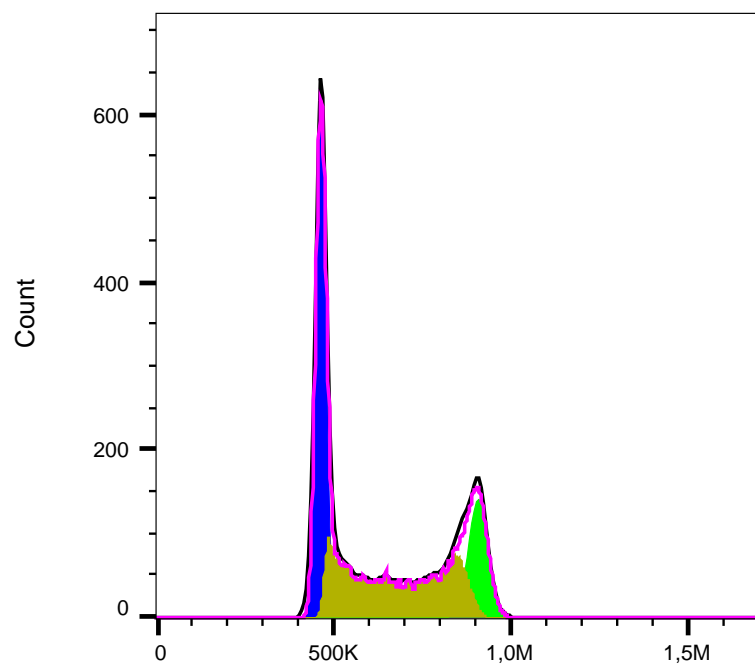

: 1,17  
 %G1 : 39,1  
 %S : 42,0  
 %G2 : 18,0  
 G1 Mean : 4,66E5  
 G2 Mean : 9,10E5  
 G1 CV : 4,26  
 G2 CV : 4,29  
 % less G1 : 0,90  
 % greater G2 : -0,19

FL2-A :: FL2-A  
 A02 UT-SCC-8 ANO1 KD-1.fcs  
 Cell Cycle  
 9418

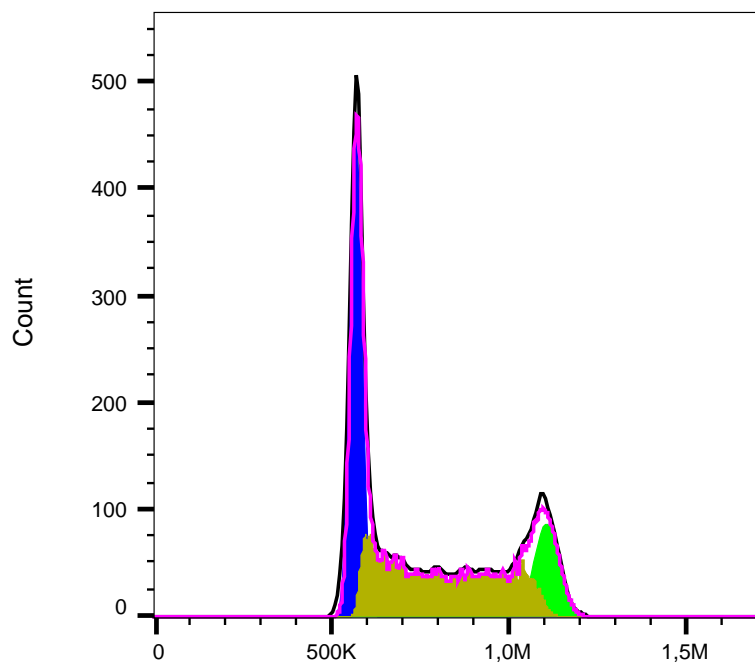

: 1,21  
%G1 : 37,9  
%S : 46,2  
%G2 : 15,1  
G1 Mean : 5,72E5  
G2 Mean : 1,11E6  
G1 CV : 4,19  
G2 CV : 4,48  
% less G1 : 0,99  
% greater G2 : -0,028

FL2-A :: FL2-A  
A06 UT-SCC-8 ANO1 KD2- 2.fcs  
Cell Cycle  
8940



# Run 3- UT-SCC-14

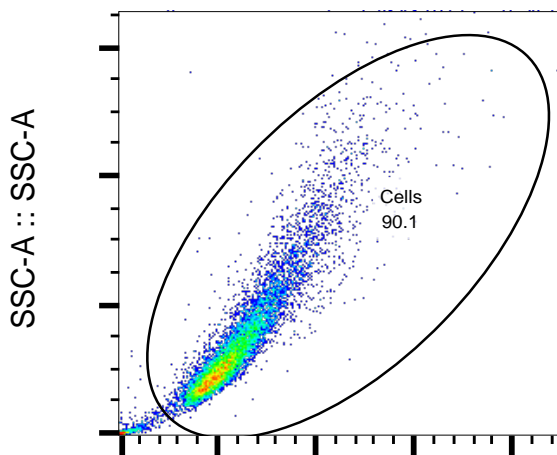

FSC-A :: FSC-A  
A04 14 shscramble.fcs  
Ungated

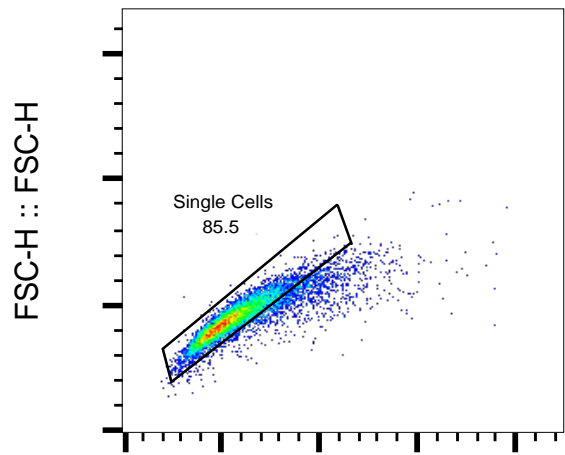

FSC-A :: FSC-A  
A04 14 shscramble.fcs  
Cells

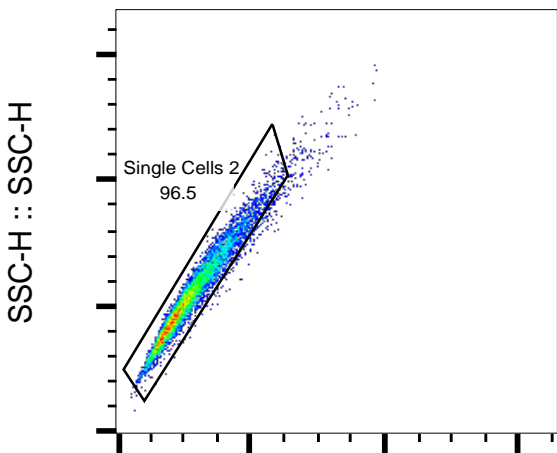

SSC-A :: SSC-A  
A04 14 shscramble.fcs  
Single Cells

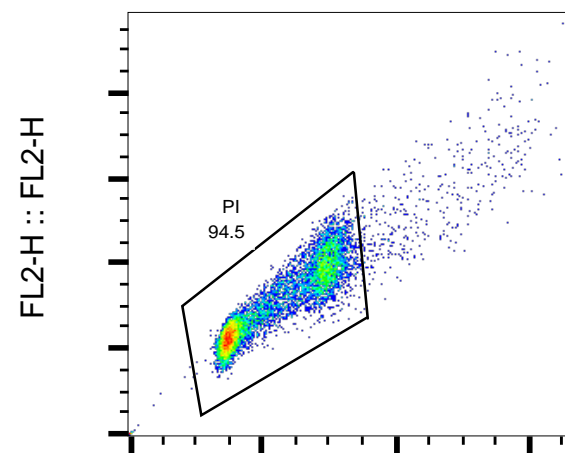

FL2-A :: FL2-A  
A04 14 shscramble.fcs  
Single Cells 2

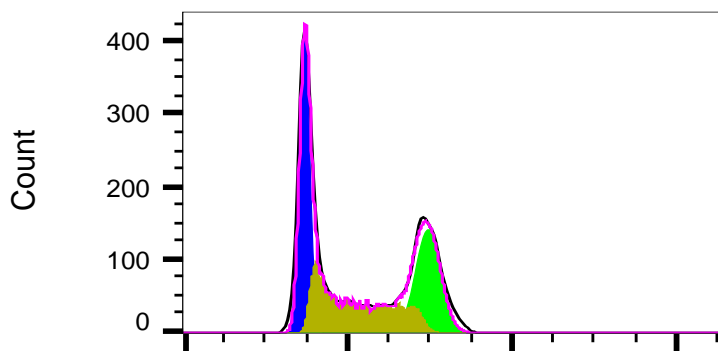

FL2-A :: FL2-A  
A04 14 shscramble.fcs  
Cell Cycle

: 1.79  
%G1: 34.3  
%S: 34.8  
%G2: 28.7  
G1 Mean: 148789  
G2 Mean: 298472  
G1 CV: 5.97  
G2 CV: 7.19  
% less G1: -1.73  
% greater G2: 3.61

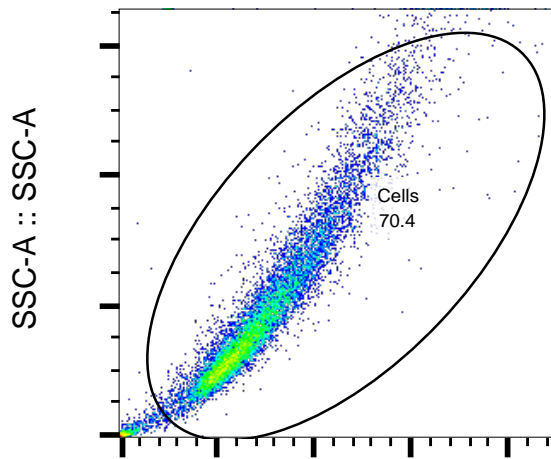

FSC-A :: FSC-A  
A05 14 KD65.fcs  
Ungated

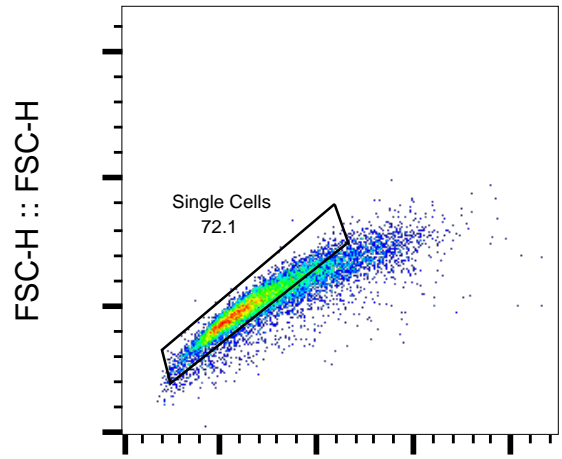

FSC-A :: FSC-A  
A05 14 KD65.fcs  
Cells

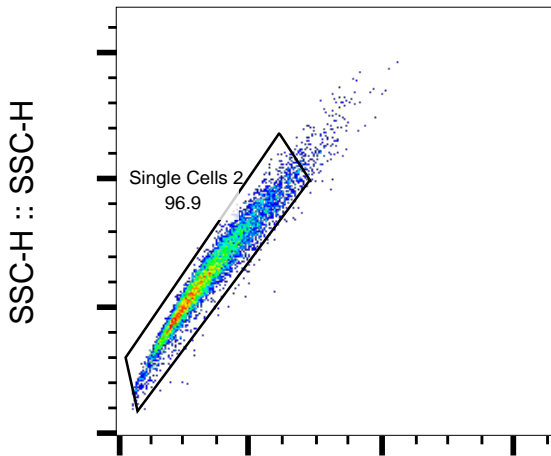

SSC-A :: SSC-A  
A05 14 KD65.fcs  
Single Cells

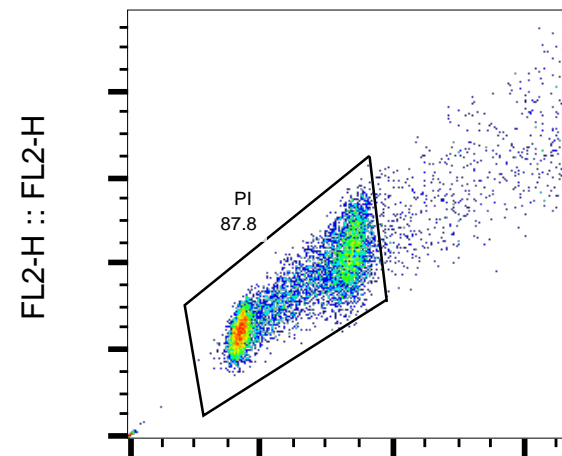

FL2-A :: FL2-A  
A05 14 KD65.fcs  
Single Cells 2

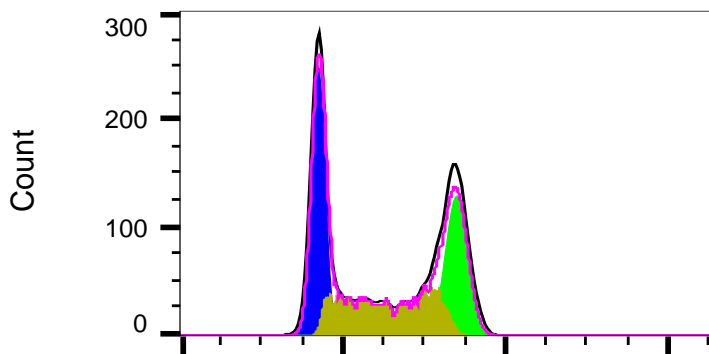

FL2-A :: FL2-A  
A05 14 KD65.fcs  
Cell Cycle

: 0.91  
%G1: 35.3  
%S: 33.8  
%G2: 29.2  
G1 Mean: 170331  
G2 Mean: 340101  
G1 CV: 6.99  
G2 CV: 5.61  
% less G1: 0.32  
% greater G2: 1.86

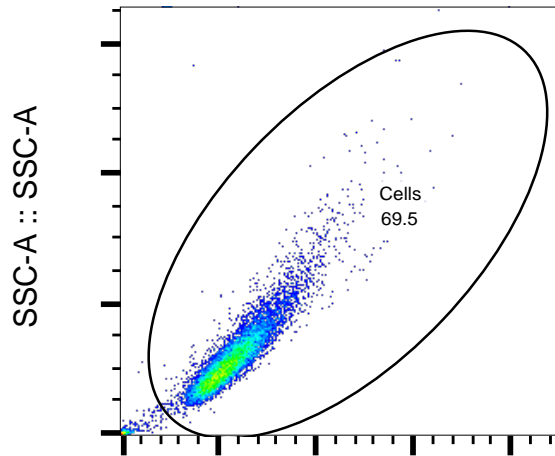

FSC-A :: FSC-A  
A06 14 KD66.fcs  
Ungated

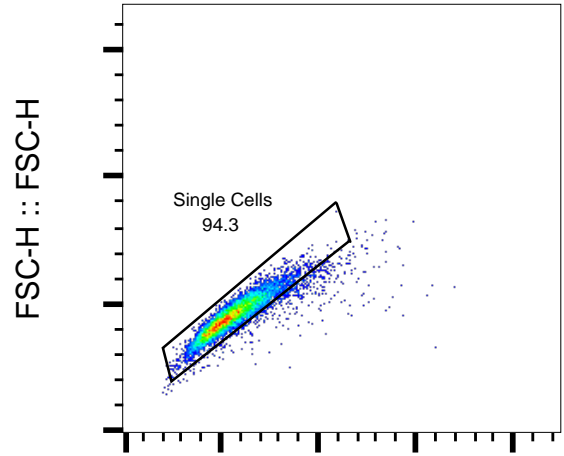

FSC-A :: FSC-A  
A06 14 KD66.fcs  
Cells

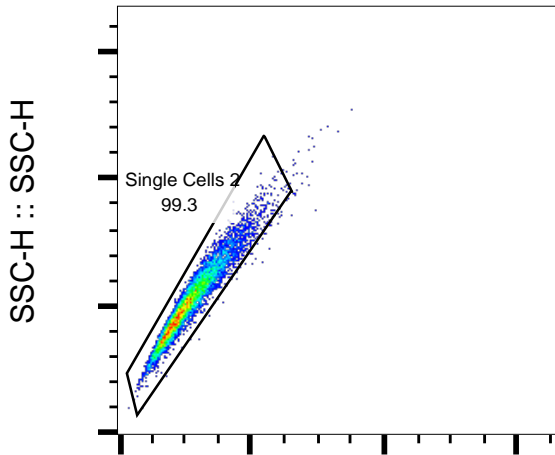

SSC-A :: SSC-A  
A06 14 KD66.fcs  
Single Cells

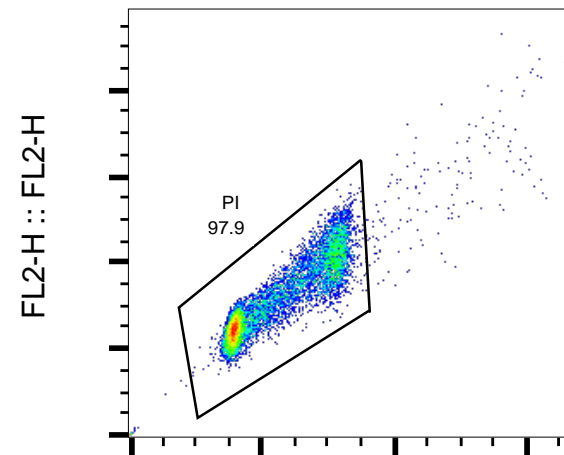

FL2-A :: FL2-A  
A06 14 KD66.fcs  
Single Cells 2

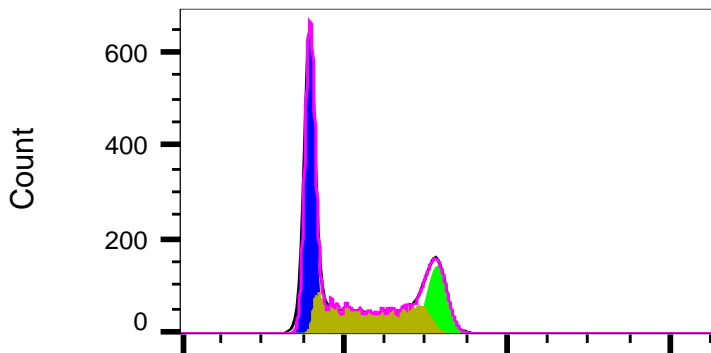

: 1.12  
%G1: 44.4  
%S: 36.2  
%G2: 19.0  
G1 Mean: 158774  
G2 Mean: 314884  
G1 CV: 5.37  
G2 CV: 5.25  
% less G1: 0.65  
% greater G2: 0.14
